# Supplementary material for: Does the sex difference in competitiveness decrease in selective sub-populations? A test with intercollegiate distance runners
Source: PeerJ. 2015 Apr 21;3:e884. doi: 10.7717/peerj.884 (PMC4411483; doi:10.7717/peerj.884)
Supplement: Supplemental Information 1 [file peerj-03-884-s001.xls]

## Sheet: Sheet1
What is your sex?	Sort code	Day completed	Competitive Season (miles/week)	1.22 Fem Competitive Season (miles/week)	Competitive Season (running sessions/week)	When running regularly in COLLEGE, how many sessions of AEROBIC CROSS-TRAINING did you usually do per week? If you didnâ€™t keep track or canâ€™t recall, please leave this blank.	How many times in your COLLEGE career did you miss AT LEAST 2 WEEKS of training because of illness or injury?	College AllSessions	Have you ever finished as one of the top 10 INDIVIDUAL cross-country performers in your CONFERENCE meet?	Have you ever finished as one of the top 50 INDIVIDUAL cross-country performers in your divisionâ€™s NATIONAL meet?	I plan to continue racing competitively after my collegiate career is over.	I might try making it as a professional runner.	Qualifying for the Olympic trials or a national team is a long-term goal of mine.	Iâ€™d love to be a professional athlete.	I would like to take my training to the next level.	If I had the opportunity, I would train much more than I currently do.	I look forward to training much less after my collegiate running career is over.	Elite + Training Desire Combined	I have often had to limit my training because of injuries and illness.	I am committed to doing the best that I can in school.	I take my education at least as seriously as my running.	How many hours per week do you usually study?	I already have (or had) at least one child.	I am likely to have children in the next 3 years.	What is your current age in years?	What year of undergraduate studies are you in?	What NCAA athletic division did you most recently participate in?	How many seasons of collegiate CROSS-COUNTRY have you participated in?	How many seasons of collegiate OUTDOOR track & field have you participated in?	Total Seasons Cross Out and Indoor	What is the highest level of athletic-related financial aid that you have received?	What best describes the extent to which you were recruited to run in college?	health orientation	weight concern	affiliation	recognition	comptetition	personal goal achievement	psychological coping	self-esteem	life meaning	competetiveness	win orientation	goal orientation	Speed Quartile	Speed Percentile	What is your sex?
Response	2
Male	9	1	50	50	8		0	8	0	0	3	2	1	4	4	4	2	2.85714	1	4		13	0	1	21	4	3	4	4	12	0	1	4.83333	2.75	6.16667	4.5	4	5.66667	5	6.375	6	3.30769	2.66667	4.16667	1	6.00601	1
Female	10	1	45	54.9	7	4	2	11	0	0	5	5	5	5	5	5	4	4.85714	2	5	5	18	0	2	18	2	1	1	0	2	2	3	5	4	4.5	5	7	7	6	5.875	2.71429	4	3.33333	4			0
Male	11	1	35	35	6	1	2	7	0	0	3	1	2	5	5	3	4	3.28571	5	4	3	2.5	0	1	18	1	1	0	0	1	0	1	3.16667	1.25	2	4.16667	6.5	7	1.11111	4	3	4.92308	4.66667	3.83333			1
Female	12	3	35	42.7	6	0	2	6	0	0	5	4	4	4	4	3	4	4	2	5	5	23	0	1	20	3	1	3	3	9	2	3										4.38462	4.16667	4.66667			0
Female	14	1	55	67.1	7	2	5	9	0	0	4	2	3	4	4	4	4	3.57143	5	5	5	18	0	2	21	3	1	1	1	4	2	2										5	4.83333	4.83333	4	86.6667	0
Female	16	1	40	48.8	6	1.5	0	7.5	0	1	3	1	1	1	1	1	2	1.42857	4	5	4	23	0	1	20	3	3	2	2	6	0	0	6.83333	6.75	5.66667	5.33333	2.75	4.5	4.55556	3.25	6.57143	3.30769	2.16667	3.5	1	15.6667	0
Female	17	1	60	73.2		0	2		0	0	4	2	2	4	4	4	4	3.42857	4	5	5	18	0	2	20	3	3	3	3	9	1	2	5.83333	7	5	6	6	7	6.77778	6.25	4.57143	5	4.83333	5			0
Female	18	1	70	85.4	9	0	0	9	1	1	4	3	4	5	5	4	4	4.14286	1	4	4	8	0	2	21	3	2	2	2	6	2	2	5.5	2	1.66667	4.33333	5.25	5.33333	2.11111	4.75	1.57143	4.38462	3.16667	4.16667	4	92.3333	0
Male	20	1	125	125	10	0	2	10	1	1	2	2	2	3	3	1	2	2.14286	2	3	2	2.5	0	1	21	4	1	3	2	8	2	3	4.5	3.5	3.83333	2.66667	6.5	6.16667	2.22222	2	2.14286	4.92308	4.5	4.33333	4	96.6967	1
Female	21	1	45	54.9	9	3	10	12	0	0	3	1	1	1	3	3	3	2.14286	5	5	5	8	0	1	21	3	1	2	2	6	1	2	5	5.5	4.33333	3.16667	2.5	5.66667	7	5.625	4.71429	3.38462	1.66667	4.66667			0
Male	22	1	55	55	7	1	5	8	0	0	3	2	2	3	3	2	2	2.42857	4	4	4	18	0	1	20	3	1	3	3	9	0	1	4.83333	3.25	5	4	5.25	6.16667	4.33333	4.875	4.28571						1
Female	23	1	50	61	8	2		10			4	2	2	3	2	5	5	3.28571	1	5	5	18	0	2	18	1	1	1	0	2	3	3	4.5	6.25	4.16667	7	7	7	7	7	7	4.69231	4.33333	5			0
Female	24	1	60	73.2	9	0	2	9	0	1	4	1	1	4	3	4	2	2.71429	1	5	5	8	0	1	21	4	1	3	2	8	2	1	3.16667	2.75	2.66667	1.33333	4	6.66667	1.22222	3	2.57143	4.30769	2.33333	4.83333	3	61.6667	0
Female	26	1	70	85.4	9	2	5	11	0	0	2	1	1	3	2	1	1	1.57143	4	5	5	26	0	2	22	4	1	4	3	11	0	1	4.66667	2.75	5.33333	4.66667	3.75	5.16667	2.77778	5.125	3.42857	4.07692	3.66667	4			0
Female	27	1			6	2	10	8	0	0	5	4	4	4	4	5	4	4.28571	5	5	4	23	0	2	19	1	1	0	0	1	3	1	4.16667	5	4	6.83333	6.25	6.16667	4.44444	6.75	5.85714	4.46154	4.33333	4.33333	1	17.3333	0
Female	28	1	45	54.9		10	8		0	0	3	1	1	1	1	2	3	1.71429	5	3	1	23	0	2	20	2	1	2		4	2	2													3	72.6667	0
Female	29	1	50	61	6	1	10	7	0	0	2	2	1	4	3	2	4	2.57143	5	5	5	23	0	2	21	3	1	1	1	3	0	2	4.83333	4.25	5.83333	2.66667	4.5	6.16667	4.11111	5.125	6.14286	3.46154	2	4.33333	4	85	0
Male	32	1	50	50		0	0		0	0	4	1	1	5	4	3	4	3.14286	1	5	5	18	0	1	20	2	3	2	2	6	0	0	3.33333	1	3.66667	2.83333	5.25	5	3.55556	4.5	3.42857	5	4.33333	5			1
Female	34	1	60	73.2	9	4	2	13	0	0	4	1	1	1	3	4	3	2.42857	2	4	4	13	0	1	19	2	3	1	1	4	0	2	5	5.75	3.66667	4.5	4.5	5.5	4.88889	4.75	4.42857				2	25.6667	0
Female	36	1	140	170.8	9	2	5	11	0	0	3	2	3	4	4	2	2	2.85714	4		5	13	0	1	19	1	1	0	0	1	2	1										5	4.16667	5	2	39	0
Male	37	1	70	70	7	0	0	7	0	0	4	3	3	5	5	4	4	4	1	4	4	23	0	2	20	2	1	2	1	3	0	1	3.83333	1.5	4.33333	4.83333	6.25	5.66667	2.44444	4.625	3.57143	4.61538	2.66667	4.33333			1
Male	38	1	80	80		1	2		0	1	4	1	3	4	4	4	4	3.42857	2	4	4	13	0	1	20	3	3	3	2	8	0	2	4	2.25	6.66667	5	4	5.83333	6	6.25	6.42857	3.69231	2	4.33333	3	62.4625	1
Female	40	1	45	54.9		0.5	0		0	0	2	1	1	1	5	2	3	2.14286	1	5	5	26	0	2	19	1	3	1	1	3	0	1	5.5	5.25	6	4.33333	6.5	7	6.33333	6.625	5.85714	4	2.66667	5	1	4.66667	0
Female	41	1	40	48.8	5	4	2	9	0	0	5	1	1	4	4	4	4	3.28571	5	5	5	23	0	1	19	1	1	0	0	0	0	1										5	3.5	4.66667			0
Male	42	1	70	70	7	1	2	8		0	5	3	1	2	5	5	5	3.71429	1	5	5	26	0	1	20	2	3	2	0	3	0	2															1
Male	43	1	70	70		0	5		0	0	3	3	2	4	4	2	2	2.85714	4	4	3	2.5	0	2	20	2	1	1	0	2	2	2	3.33333	3	4.33333	4.16667	5	5.5	2.88889	3.625	2.85714	3.69231	3	3.5			1
Female	44	1	36	43.92	6	1	2	7	0	0	4	3	5	3	3	2	3	3.28571	1	4	4	18	0	1	20	2	1	1	1	4	1	3	3.33333	1	4.5	3.5	4	5.66667	4.11111	4.75	4.14286	3.61538	3.33333	3.5			0
Female	45	2	70	85.4	10	0	5	10	0	0	5	3	4	5	4	4	5	4.28571	4	5	5	13	0	1	21	4	1	2	2	6	2	1	3.33333	1.75	2.83333	2.83333	5.5	6.66667	3.22222	3.375	2.57143	4.92308	3.5	5	4	91.3333	0
Male	46	2	65	65	7	2	2	9	0	0	5	1	1	4	4	2	4	3	1	5	5	23	0	1	22	4	3	4	4	12	0	2	5.16667	3.5	5.16667	5.66667	6.5	6.16667	6.66667	5.75	6.28571	4.46154	4.5	4.5			1
Female	47	1	30	36.6	5	2	5	7	0	0	4	1	2	4	3	2	4	2.85714	5	5	5	18	0	1	21	3	1	2	2	5	2	3	2.66667	2.75	2.83333	3.83333	4.5	5.66667	3.11111	3.875	2.57143	4.92308	3.66667	4.66667			0
Male	48	1	83	83	9	0	2	9	0	0	4	4	5	4	4	3	3	3.85714	2	5	4	2.5	0	1	19	2	1	2	1	5	0	1	4.83333	3.5	5.16667	6	6.75	7	5.22222	5.125	5.71429	4.92308	4.16667	5	4	79.8799	1
Male	50	1	75	75	9	0	2	9	0	0	4	1	1	4	3	4	2	2.71429	5	4	4	23	0	2	19	2	3	2	0	4	0	2										4.92308	4.83333	4.83333			1
Female	51	1	45	54.9		4	2		0	0	4	1	1	4	4	3	2	2.71429	4	4	4	2.5	0	2	19	2	3	2	1	5	0	1	3.66667	3.25	1.5	2	2.75	4.66667	3.11111	2.5	1.57143	3.46154	2.83333	3.5			0
Male	52	1	40	40	10	0	0	10	1	0	5	5	5	5	5	4	5	4.85714	4	5	4	8	0	1	22	2	1	2	1	5	3	3	1.16667	1	1	3.16667	7	7	1	4.5	1.28571	4.69231	3.83333	5	4	81.6817	1
Female	53	1	60	73.2		2	2		0	0	3	2	2	3	3	2	2	2.42857	4	5	5	26	0	1	20	2	1	2	1	5	0	3															0
Male	54	1	60	60	9	0	0	9	0	0	4	2	1	2	3	2	4	2.57143	3	4	5	13	0	1	18	1	3	1	0	2	0	2	3	1.75	3.5	3.16667	5	6.5	3.44444	3.75	3.28571	4.07692	3.16667	4.83333			1
Female	56	1	50	61	6	1	2	7	0	0	2	1	1	1	3	3	3	2	2	4	4	18	0	1	19	2	1	2	1	4	0	1	3.16667	1.75	4.16667	2.16667	2.75	5	3.55556	3.25	2.57143	3.84615	2.66667	4			0
Female	57	1	65	79.3	6	1	0	7	1	0	2	2	1	3	2	2	4	2.28571	1	5	5	13	0	1	19	2	1	2	2	6	0	2	3.5	1	3.5	2.83333	4	6.83333	2.77778	4.25	2.71429	4.30769	2.5	4.5			0
Female	58	1	60	73.2	7	3	2	10	0	0	3	2	2	3	5	3	4	3.14286	2	5	5	18	0	1	21	3	3	3	2	7	0	2										4.61538	4.33333	4.83333	1	24.3333	0
Male	59	1	90	90		0	2		0	0	4	2	3	4	4	2	3	3.14286	2	4	5	13	0	1	21	4	3	3	3	10	0	2										4.84615	4.66667	4.83333			1
Female	60	1	70	85.4	10	0	2	10	1	1	4	2	5	3	4	2	3	3.28571	2	4	4	13	0	2	22	4	1	3	3	9	3	2	5.33333	3	5.83333	4.83333	5.75	6.16667	3.44444	5.125	4.14286	4.61538	3.66667	4.5	4	99.3333	0
Male	61	1	50	50		0	5		0	0	4	3	2	5	5	4	1	3.42857	5	5	5	13	0	1	21	3	3	2	2	7	0	1	4.5	2.25	4.66667	4.66667	4.75	6.33333	4.33333	5.375	5.71429	4.38462	3.16667	5			1
Male	62	1	85	85	8	0.5	2	8.5	0	0	3	1	1	4	4	5	2	2.85714	1	4	3	8	0	2	22	4	1	4	3	11	0	3										4.15385	4.16667	4.33333	4	80.1802	1
Male	63	1	70	70	7	0	0	7	0	0	5	3	3	5	5	3	5	4.14286	1	4	4	18	0	1	19	1	1	1	1	3	0	2	3.83333	2	2.33333	2.66667	5.5	6.16667	1.33333	4.625	2.85714	3.92308	4.16667	4	3	68.4685	1
Female	64	1	55	67.1	6	0	2	6	1	0	4	1	1	1	1	1	2	1.57143	2	4	5	26	0	2	21	3	1	3	2	8	0	1	3.5	1.75	4.66667	2.16667	4	5.66667	3.44444	4.125	2.85714	3.84615	2.66667	4.16667	4	83.6667	0
Male	65	1	85	85	2	0	0	2	0	0	3	2	2	4	3	4	3	3	2	4	3	26	0	1	21	3	3	3	2	8	0	2	3.5	3.25	4.33333	4	4.75	5.83333	4.88889	4.625	4.71429	4.23077	4.33333	3.66667	2	33.3333	1
Male	66	1	50	50	9	1	2	10	0	0	3	1	1	4	4	2	3	2.57143	2	5	5	13	0	1	19	1	1	1	0	2	0	2	5.5	3.75	6.16667	6	4.5	5.66667	4.33333	5.125	3.42857	4	3.66667	4.33333			1
Male	67	1	80	80	7	1	0	8	0	0	3	1	2	4	5	2	5	3.14286	2	5	5	18	0	1	19	2	1	2	1	5	0	2	5.33333	5	5.33333	4.16667	6.75	7	5.11111	4.75	3.85714	4.84615	3.33333	4.83333	4	87.3874	1
Female	68	1	35	42.7	6	2	5	8	0	0	3	1	1	1	1	1	1	1.28571	4	4	5	18	0	1	19	2	3	2	1	4	0	3	3.66667	4	4.66667	5.5	7	4.66667	2.44444	4.5	3						0
Male	69	1	15	15	6	5	10	11	0	0	2	1	1	4	2	2	2	2	5	4	5	2.5	0	1	21	3	3	2	2	7	0	1													1	1.2012	1
Male	70	1	80	80	7	1	2	8	0	0	5	2	1	5	5	5	5	4	1	5	5	13	0	3	21	3	1	3	3	7	1	2	5.5	4.25	4.16667	4.33333	5.5	6.16667	2.88889	4.25	3.42857	3.84615	3.66667	4	2	42.9429	1
Male	71	1	85	85	10	0	2	10	0	0	2	1	1	3	2	2	2	1.85714	4	4	4	8	0	1	21	4	1	4	4	12	0	1	2.83333	3.5	5.33333	3.83333	4.25	5	4.11111	4.875	4.42857	3.76923	1.83333	3.83333	3	72.3724	1
Female	72	2	55	67.1	7	1	0	8	0	0	4	1	1	5	5	5	5	3.71429	3	5	5	23	0	1	22	4	3	4	4	12	0	1	3.66667	3.75	5.5	4.83333	6	6.16667	4.44444	5	4.57143	4	4	4			0
Female	73	1	50	61	7	2	0	9	0	0	5	4	4	4	4	4	3	4	3	4		13	0	1	18	1	3	1	1	3	0	2	4.83333	5.25	6	6.33333	6.5	6.66667	4.88889	5.125	5.42857	4	4.66667	3.83333	2	27.3333	0
Male	74	1	65	65	8	1	0	9	0	0	1	1	1	1	4	4	4	2.28571	1	5	5	26	0	2	18	1	3	1	0	2	0	0	4.83333	2.75	2.66667	1.33333	4.5	6.66667	4.88889	4	3.28571	3.69231	2.33333	4.16667			1
Male	75	1	100	100	12	0	0	12	0	0	5	2	2	4	5	4	5	3.85714	1	4	2	2.5	0	1	20	2	1	2	2	6	0	0	4.5	2	3.16667	3	6.75	6.83333	2.77778	4.625	3	5	4.16667	5			1
Male	76	1	75	75	10	4	2	14	0	0	4	2	2	5	4	4	4	3.57143	5	5	4	8	0	2	22	4	1	3	3	9	2	2	3.83333	1.75	3.16667	3.5	4.5	5.16667	3.55556	3.375	3.42857	4	3.66667	3.66667	3	56.4565	1
Male	79	1	75	75	7	1	2	8	0	0	4	4	5	4	5	5	3	4.28571	1	5	4	18	0	2	19	2	3	2	2	6	0	2	6.66667	3	4.66667	5.33333	7	7	6	6	5.71429	5	4.5	5	2	31.8318	1
Female	80	1	45	54.9	7	4	2	11	0	0	5	2	2	4	4	4	3	3.42857	5	5	5	23	0	1	22	4	3	4	2	10	0	1	5.66667	4.25	6.5	3.83333	4.5	6.5	4.22222	5.5	5.42857	4.07692	3.33333	4.66667	2	31.3333	0
Female	81	1	40	48.8	6	3	0	9	0	0	5	3	3	4	4	5	5	4.14286	4	4	3	13	0	1	19	1	1	0	1	2	0	1															0
Female	82	1	50	61	7	0	0	7	0	0	3	1	1	2	2	3	5	2.42857	2	5	5	23	0	2	20	3	3	3	2	8	0	0	4.66667	3.25	5	3	3.5	6.83333	5.88889	5.125	5.14286	3.53846	2.16667	5	1	21.3333	0
Male	83	1	40	40	6	0	2	6	0	0	4	1	1	1	1	1	1	1.42857	1	5	5	13	0	1	19	1	3	1	0	2	0	2	1.66667	1	5.66667	1	1	2.33333	4.22222	1.625	5	1.46154	1	1.16667			1
Female	84	1	60	73.2	7	0	0	7	0	0	1	1	1	1	1	1	2	1.14286	3	4	4	8	0	1	20	2	1	2	1	5	2	1	2.66667	1	4	2.66667	2.75	3.16667	1.44444	2.5	2.28571	3.46154	3.5	3.33333	2	28.3333	0
Female	85	1	65	79.3	6	2	2	8	1	0	4	1	2	3	4	2	2	2.57143	2	4	4	8	0	1	21	3	1	3	3	9	2	2	2.5	3.25	4.16667	5.33333	4.25	6.33333	3.22222	5.625	3.71429	3.84615	3.33333	3.5	4	91	0
Male	86	1	85	85	9	0	5	9	0	0	5	5	5	5	5	3	4	4.57143	5	4	4	18	0	1	22	6	1	4	2	9	3	3	2.5	1.5	1.83333	3.83333	6.25	7	1.66667	3.5	1.85714	5	4.5	5	4	95.1952	1
Female	87	1	55	67.1	7	2	5	9	1	0	5	3	3	4	4	4	4	3.85714	5	5	5	26	0	1	21	4	3	4	3	9	0	1	4.66667	4	5.5	3.33333	3.25	6.33333	4.66667	4.5	4.85714	3.76923	2.66667	4.5	3	64	0
Male	88	1	95	95	11	0	0	11	0	0	5	5	5	5	5	4	5	4.85714	2	5	2	2.5	0	1	19	2	2	1	0	2	0	1	4	2.5	2.16667	5	7	6.5	2.88889	4.75	4	4.84615	4.33333	4.33333	3	62.7628	1
Male	91	1	60	60	6	2	2	8		0	2	2	3	2	3	2	2	2.28571	5	4	4	18	0	1	19	1	3	1	1	3	0	3	2.5	2	3.16667	4.5	5	5.66667	1.77778	3.125	1.28571	3.92308	3.66667	3.16667			1
Female	92	1	60	73.2	7	1	2	8	0	0	4	3	4	5	5	4	3	4	1	5	5	8	0	3	21	3	2	3	3	6	2	2	6.16667	5.5	6	6.83333	6.5	7	5.11111	6.875	6.28571	4.69231	4	5	2	42.6667	0
Male	94	1	80	80	9	0	2	9	1	1	5	4	5	4	5	5	4	4.57143	5	1	1	2.5	0	5	21	6	1	4	3	8	3	3	2.83333	2	2.5	3	6.25	6.5	1.88889	2.5	3.71429	4.23077	3.83333	4.83333	4	93.994	1
Female	96	1	40	48.8	7	3	2	10	0	0	5	3	3	5	4	3	3	3.71429	4	5	5	26	0	1	19	1	3	1	0	2	0	3	6.33333	4	5.5	6.66667	6	6.66667	5.77778	5.125	5.71429	4.61538	3.5	4.33333			0
Male	97	1	100	100	11	0	0	11	0	0	4	2	3	5	5	4	4	3.85714	1	5	5	26	0	1	21	3	1	3	2	8	2	2	5.16667	2.25	3.83333	2	5.75	7	5.44444	4.75	3.71429	4.38462	3.66667	5	4	94.8949	1
Male	98	1	80	80	12	1	0	13	1	0	5	3	2	3	5	3	2	3.28571	1	5	5	13	0	2	22	4	3	4	3	11	0	1	5.16667	5	5.66667	5	4.75	5.5	5	5.25	5.14286	4	3.33333	4			1
Male	99	1	95	95	9	0	2	9	0	0	5	1	1	2	5	3	5	3.14286	1	5	5	18	0	1	18	1	1	1	0	1	0	1	3.5	1.5	3.5	3	3.5	4	4.22222	3.5	3.71429	4	3.5	4.5	2	33.6336	1
Male	100	1	60	60	7	2	10	9	0	0	3	3	3	4	4	2	4	3.28571	5	2	1	2.5	0	1	22	4	2	0	2	3	2	1	1.66667	1	1.16667	1.5	5.75	5.83333	3.55556	4	4.14286	4.84615	4.33333	4.83333			1
Male	101	1	65	65	10	0	2	10	0	0	4	1	1	3	5	3	4	3	2	5	5	23	0	1	20	2	3	2	2	5	0	1	4.66667	6.25	3	5.5	5.25	5.66667	4.22222	5.25	4.57143	3.53846	4	4.16667	1	19.8198	1
Male	102	1	70	70	10	2	5	12	1	0	3	3	3	4	4	5	2	3.42857	5	4	4	8	0	1	21	3	3	3	2	8	1	3	6.16667	3.5	5.5	4.16667	6.75	7	2.33333	5.25	1.85714				4	82.2823	1
Male	103	1	55	55		3.5	0		0	0	4	4	4	4	4	2	4	3.71429	2	4	4	18	0	2	18	1	1	1	0	2	0	3	4.5	1.5	2.83333	2.66667	4.75	6.5	4	4.5	2.57143	4.38462	3.16667	4.83333	3	64.8649	1
Male	104	1	70	70	7	2	8	9		0	4	2	2	5	5	5	4	3.85714	5	4	4	13	0	1	18	1	3	1	0	2	0	1										5	5	5			1
Male	105	2	60	60	7	3	0	10	0	0	5	1	1	5	5	4	5	3.71429	1	5	5	18	0	1	19	1	3	1	0	1	0	1	2.33333	3.25	4.16667	2.5	5.25	6	2.22222	2.625	4				2	30.3303	1
Male	106	1	80	80		1.5	2		0	0	4	1	1	4	3	2	3	2.57143	2	5	4	18	0	2	21	4	3	4	4	12	0	2	3.83333	3.75	6.16667	4.33333	6.5	6.66667	3.11111	5.5	4.57143	4.46154	3.66667	4	3	70.5706	1
Female	107	1	40	48.8	7	1	2	8	0	0	5	5	5	5		3	4		2	4	2	2.5	0	1	18	1	1	0	0	0	2	3	4.33333	5.25	5.66667	6.33333	6.5	6.5	3.11111	5.875	5.14286	4.61538	4.83333	4.83333			0
Female	109	1	65	79.3	9	3	5	12	1	0	5	2	1	3	5	5	3	3.42857	5	5	5	18	0	1	21	3	3	3	2	7	0	3	4.66667	5.5	5.83333	5.83333	4.25	6.5	5.55556	6.5	6.14286	3.69231	4.33333	4.83333	4	85.6667	0
Male	110	1	70	70	8	0	0	8	0	0	5	1	1	3	4	4	5	3.28571	2	5	5	23	0	1	21	3	3	3	2	8	0	0	4.5	2.5	4.66667	3	5.75	7	5.44444	4.875	6.71429	4.30769	2.66667	5			1
Male	112	1	75	75	9	1	2	10	0	0	4	2	2	4	4	4	4	3.42857	2	4	5	26	0	2	22	4	1	4	3	11	0	1	4.16667	3	3.33333	4	2.5	4.83333	4	3.625	6	3.46154	3.5	3.33333	3	50.1502	1
Male	116	1	80	80	9	1	2	10	0	0	5	3	3	4	4	4	3	3.71429	4	4	4	18	0	1	20	3	1	3	2	8	0	2	6.66667	5	5.83333	4.66667	5.75	6.33333	5.88889	6.375	6	4.38462	4	4.16667	3	71.4715	1
Male	117	1	60	60	7	0	2	7	0	0	3	1	1	5	4	5	3	3.14286	4	5	3	8	0	1	19	2	3	2	2	6	0	1	2.83333	1.25	3.33333	1.5	5	5.33333	2.77778	2.75	1.71429	4.76923	4	3.66667			1
Male	118	1	90	90	10	0	5	10	0	0	4	2	2	2	3	3	3	2.71429	1	5	5	8	0	1	21	3	1	2	1	5	2	3	6.83333	5.5	5.16667	5	5.5	6.66667	4.22222	5.75	4.57143	4.07692	4.33333	3.83333	2	48.3483	1
Female	119	1	40	48.8	6	2	5	8	0		2	1	1	1	1	1	2	1.28571	4	4	5	13	0	1	21	4	3	4	1	6	0	2	2	1.25	3.66667	3.5	4.75	4.33333	2.22222	5.5	1.85714						0
Male	120	1	75	75	12	1	10	13	1	0	5	3	5	5	5	5	5	4.71429	5	5	5	8	0	1	22	4	2	3	3	9	2	3	4.16667	3.75	4.5	4.33333	5.75	6.83333	5.88889	6.125	6.57143	5	3.5	5	3	63.964	1
Female	124	1	52	63.44	9	0	2	9	1	0	5	4	4	5	5	3	4	4.28571	3	5	5	8	0	1	20	3	2	3	2	8	2	3	3	1.5	1.66667	2.33333	3.25	4.5	5	3.375	4.85714	4.92308	3.33333	5	4	87	0
Female	126	1	50	61	6	0	2	6	1	0	3	1	2	3	3	1	2	2.14286	2	5	5	18	0	1	20	3	1	3	3	9	0	2	3.83333	2.75	4.33333	2.83333	4	6.33333	3.33333	4.625	3.57143	4.69231	3.33333	4.83333			0
Female	127	1	45	54.9	1	1	0	2	0	1	5	4	4	4	4	4	4	4.14286	2	4	4	13	0	2	18	1	3	1	0	2	0	3	3.33333	2.75	1.33333	3.5	4.75	6.33333	3.22222	4.875	4	4.07692	4	4			0
Male	128	1	72	72	10	1	2	11	0	0	5	3	2	4	4	2	3	3.28571	3	4	3	8	0	1	20	2	2	1	0	2	1	2	2.83333	1.5	2.66667	3.16667	6.5	7	5.22222	4	2.57143	4.38462	3.83333	4			1
Female	129	1	50	61	6.5	0	0	6.5	1	0	4	1	1	2	3	3	3	2.42857	2	4	4	18	0	2	21	3	3	3	2	8	0	2	4.66667	3.5	5.16667	4.16667	4.5	6.66667	5.55556	5.5	5.71429	3.38462	2.16667	3.66667	3	64.6667	0
Male	130	1	70	70	7	1	0	8	0	0	3	2	2	5	4	4	3	3.28571	2	4	3	13	0	1	19	1	1	1	0	2	2	3										3.69231	3	4	2	45.045	1
Male	132	1	40	40	8	2	2	10	0	0	2	1	1	3	2	4	2	2.14286	2	2	2	2.5	0	2	22	4	3	4	4	12	0	2	3.83333	2.25	5.5	5.16667	6.25	6.33333	2.66667	5	3.57143	5	4.5	5			1
Male	134	1			7	1	2	8	0	0	3	2	2	2	4	4	4	3	4	4	4	8	0	2	21	3	3	3	3	9	0	2	5	2	5.33333	3.66667	4.5	6.33333	4.88889	5.375	4.85714	3.69231	3.5	4			1
Female	136	1	43	52.46	6	1	0	7	1	0	4	1	1	3	3	2	4	2.57143	3	5	5	23	0	2	19	1	3	1	0	2	0	3	6.33333	4.5	6.5	5.66667	5.5	6	5.66667	6.25	6.14286	3.84615	2.5	4.33333	2	35	0
Male	137	1	60	60	8	3	2	11	0	0	5	1	4	5	5	1	4	3.57143	2	5	5	18	0	1	18	1	3	1	0	2	0	1	2	2.25	1.83333	2.16667	6	6.83333	5.55556	4.125	5.71429	4.92308	4.5	4.5	1	5.40541	1
Female	138	1	60	73.2	10	6	5	16	0	0	3	2	1	1	2	2	2	1.85714	4	5	5	18	0	1	21	4	3	4	4	12	0	2										3.30769	2.16667	4	1	7	0
Female	140	1	50	61	6	1	0	7	0	0	4	3	2	2	3	2	4	2.85714	2	5	5	2.5	0	1	18	1	1	1	0	2	2	2	4.16667	2.75	4.5	4	3	5.33333	2.88889	4.875	4	4	3.33333	4.16667			0
Male	141	1	70	70	9	0	2	9	0	0	3	2	3	3	4	3	4	3.14286	4	2	4	2.5	0	2	22	3	1	2	1	6	0	3	2.33333	2	4.5	3.83333	4.75	5.16667	2.55556	4	3.71429	4.46154	3.83333	4.83333			1
Female	142	1	56	68.32	7	0	0	7	0	0	4	2	2	3	4	2	2	2.71429	1	4	4	8	0	1	19	2	3	2	1	4	0	2	2.5	2.75	4.66667	3	3.25	5.33333	2.77778	4.25	4.14286				2	40.3333	0
Male	144	1	85	85	11	7	2	18	0	0	4	2	2	3	4	4	4	3.28571	5		3	23	0	2	18	1	3	1	1	3	0	1	6	4.5	5.83333	4.83333	4.75	5.5	6.55556	5.625	6.42857	3.76923	3	3.33333	1	7.80781	1
Female	145	1	75	91.5	9	0	10	9	0	0	4	1	1	4	1	1	2	2	3	5	5	8	0	1	22	4	2	4	3	10	2	2	4.33333	4.25	6.33333	3.66667	6.5	7	7	6.5	6.42857	4	3.83333	5			0
Male	146	1	82	82	8	0	2	8	0	0	5	5	5	5	5	5	5	5	5	4	3	13	0	1	20	2	1	2	1	5	0	2	2.83333	2	5.5	6	6.5	6	2.77778	7	5.57143	5	4.5	5	4	87.6877	1
Female	148	1	58	70.76	6	1	5	7	0	0	3	2	3	4	3	2	4	3	4	5	5	23	0	1	21	3	1	1	1	3	1	2	5.16667	4	5.66667	4.33333	5.5	6.5	5.55556	5.375	5.85714	4.53846	3.83333	4.33333	4	89.3333	0
Male	149	1	53	53	7	1	5	8	0	0	4	4	5	4	5	5	5	4.57143	4	4	5	8	0	2	22	3	1	2	1	5	3	3										3.84615	4	4.66667			1
Male	150	1	75	75		1	5		0	0	4	4	4	5	5	4	4	4.28571	5	4	3	8	0	1	22	5	1	2	3	9	2	3										5	5	5			1
Male	151	1			6		0	6	0	0	4	1	1	1	4	3	2	2.28571	1	4	4	13	0	4	20	2	3	2	0	2	2	2	5.83333	6	4	6.16667	6	6.16667	4.55556	5.5	4.42857	3.76923	3.83333	4			1
Male	152	1	8	8	6	3	0	9	0	0	4	1	1	1	2	5	5	2.71429	4	4	4	13	0	2	19	2	3	1	0	1	2	1	6	6.75	5.33333	6.5	7	7	6.11111	5.5	5	4.69231	3	4.66667			1
Male	153	1	60	60	8	0	0	8	0	0	5	4	3	4	4	3	4	3.85714	2	4	4	13	0	1	18	1	3	1	0	2	0	2	4.5	3.25	4.16667	4.33333	6	6.5	3.22222	4.875	4.71429	3.61538	3.83333	4.16667			1
Female	155	1	60	73.2	8	0	2	8	1	0	4	1	1	4	3	3	4	2.85714	5	5	5	23	0	1	21	4	3	4	2	8	0	2	4.5	4.25	4.83333	5.83333	5.75	6.66667	4	6.375	5.14286	4.23077	3.66667	4.83333	4	75	0
Male	156	1	45	45	6	4	8	10	0	0	5	3	3	5	5	5	5	4.42857	5	2	2	2.5	0	1	21	4	3	4	0	7	0	1	4.66667	2.5	4.66667	3	3.5	5.5	4.22222	5	5.28571	3.30769	1.66667	3.83333	1	20.4204	1
Male	159	1	70	70	10	2	2	12	0	0	4	1	1	4	3	1	5	2.71429	2	4	2	2.5	0	1	22	4	2	4	3	10	2	3	7	1	2	1	1	3	3	1.75	1.85714	3.53846	1.33333	3.83333	3	50.7508	1
Male	160	1	85	85	9	1	2	10	1	0	4	2	4	2	4	4	3	3.28571	2	4	4	23	0	1	19	2	3	2	0	4	1	3	3.16667	2.25	5.5	4.5	6	6.16667	3.11111	4.375	2.85714	4.69231	3.66667	4.66667	2	43.2432	1
Female	161	1	22	26.84	6	2	2	8	0	0	5	3	1	4	4	5	5	3.85714	4	4	4	8	0	1	20	3	3	2	0	2	0	1										4.61538	3.5	4.16667			0
Female	162	1	70	85.4	9	7	2	16	0	0	3	1	1	4	4	3	4	2.85714	1	5	5	18		1	21	3	1	2	2	6	2	2	5.5	4.75	4.5	4.66667	3.75	5.83333	3.22222	5.625	4.71429	3.76923	3.33333	4			0
Male	164	1			7	0	2	7	0	0	3	3	4	5	5	4	3	3.85714	2	4	3	8	0	2	20	3	1	2	1	5	2	1	2.83333	3.25	4.83333	3	6	5.83333	1.66667	4	2.57143				3	59.1592	1
Male	166	1	100	100	12	0	0	12	0	0	5	3	5	5	5	2	4	4.14286	1	5	4	23	0	1	19	2	3	2	1	5	0	1	6.33333	3.25	5.5	4.66667	6.5	7	6	5.875	6.57143	5	4.16667	4.66667	2	46.5465	1
Female	167	1	70	85.4	10	0	2	10	1	0	5	4	4	3	5	2	4	3.85714	1	5	5	18	0	1	21	4	1	4	2	9	3	3										5	4.66667	5	4	97.3333	0
Female	168	1	65	79.3	10	1	2	11	1	1	5	3	2	4	4	2	3	3.28571	2	4	4	13	0	1	22	4	3	4	2	9	0	2	5.66667	7	6.5	6.5	6.25	6.83333	6.77778	6.625	6.57143	4.69231	4.83333	5	4	78	0
Male	170	1	70	70	8	4	2	12	0	0	3	1	1	1	1	5	1	1.85714	2	5	5	23	0	1	19	2	3	1	0	2	0	1	3.33333	1.25	4.33333	1.5	3.75	5.66667	1.88889	2.5	1.42857	3.53846	3.5	4.5			1
Female	171	1	65	79.3	8	1	0	9	0	0	4	2	1	3	4	5	4	3.28571	3	5	5	23	0	1	21	3	1	3	3	8	0	0										4	3.5	4.16667	2	43.6667	0
Male	172	1			6	7	2	13	0	0	2	3	3	4	4	3	3	3.14286	5	5	3	13	0	1	18	1	3	1	0	2	0	1	4.33333	3.75	2.66667	4.5	7	6.16667	2.77778	4.125	1.85714	4.69231	4.16667	4.66667			1
Female	174	1	70	85.4	9	5	5	14	1	0	1	1	1	1	1	1	1	1	2	5	5	13	0	1	21	4	1	4	3	10	2	2	6	4	4.33333	1.5	2	5.83333	4.11111	4.25	1.85714	3.53846	2.83333	4.5			0
Male	175	1	85	85	7	0	0	7	1	0	5	2	2	2	2	2	3	2.57143	1	5	5	26	0	1	20	3	3	3	2	8	0	0	5.33333	3.25	6.66667	4.66667	5.5	7	5.11111	5.75	5	3.61538	2.33333	4	4	78.6787	1
Female	178	1	70	85.4		0	2		0	0	5	5	5	5	5	3	5	4.71429	2	5	3	13	0	1	22	4	1	4	3	11	2	2	4.5	1.25	5.33333	4	6	7	5.55556	6.25	6.85714	4.92308	4.33333	5	4	99	0
Male	179	1	75	75	9	2	2	11	1	0	3	3	3	4	5	4	4	3.71429	2	5	4	23	0	1	20	2	1	2	0	2	0	1	5.66667	4.5	6	6.16667	5.75	6	6	6	6	5	5	5	3	53.7538	1
Female	181	1	27	32.94	6	2	2	8	0	0	5	1	1	5		5	5		5	5	1	8	0	1	19	1	3	1	0	1	0	0										3.30769	2.66667	3.33333			0
Female	182	1			8	1	2	9	0	0	3	3	3	4	2	2	3	2.85714	3	5	5	18	0	1	20	2	1	2	1	5	1	2	4.66667	3.5	5.16667	4.16667	4.5	5.33333	3.55556	5.125	3.85714	4.23077	3.16667	4			0
Male	183	1	80	80	9	2	0	11	1	0	3	1	2	2	2	4	4	2.57143	2	4	3	8	0	2	19	2	3	2	1	5	1	2	2.5	2	5.33333	4.66667	4.25	5.83333	4.33333	3.625	4.71429	3.46154	2.5	4.83333			1
Male	184	1	65	65	8	1	2	9	0	0	4	1	1	5	5	5	5	3.71429	5	5	5	18	0	1	22	4	3	4	4	12	0	0	6.33333	3.25	4.83333	3.83333	6	7	5.77778	6	4.57143	4.38462	4	4.83333	1	16.5165	1
Male	185	1	70	70	7	0	0	7	0	0	3	1	1	1	1	5	3	2.14286	2	5	5	26	0	1	19	1	3	1	0	2	0	1	4	2.25	5	3.5	5.5	5.5	3.33333	5.875	3.57143	4.23077	3.83333	4.33333	3	51.0511	1
Female	186	1	40	48.8	2	0	0	2	0	0	4	3	3	4	5	4	4	3.85714	2	5	5	13	0	1	19	2	1	2	1	5	2	2	4.5	3.25	3.66667	3.83333	7	7	5	4.25	5.42857	4.69231	4.33333	4.66667			0
Female	188	1	40	48.8	6	2	8	8	0	0	4	1	1	3	3	5	4	3	5	3	4	2.5	0	1	20	3	3	2	2	4	0	1	2.83333	2.75	3.16667	2.16667	3.5	5	3	2.375	2.42857				3	55.6667	0
Female	189	1	50	61	6	1	0	7	0	0	2	1	1	2	2	3	4	2.14286	1	5	5	26	0	2	20	3	3		2	5	0	0	3.33333	3	5.16667	1.66667	3	5.83333	3	5.125	4	4.30769	2.83333	4.66667			0
Male	191	1	100	100	9	0	2	9	0	0	5	4	5	5	4	2	3	4	2	5	4	13	0	2	20	2	1	2	1	5	0	2	4.83333	1.5	2.5	4.33333	5	6.5	2.44444	4.5	5	4	3.83333	4	2	45.3453	1
Female	192	1	20	24.4	5	5	2	10	0	0	5	2	2	2	2	5	3	3	5	4	5	18	0	1	18	1	3	1	0	1	0	0	5	5.25	4	2.83333	6	5.83333	5	5.375	3.42857	4.53846	3.33333	3.83333			0
Female	193	1	60	73.2	10	0	5	10	0	0	2	1	1	1	1	3	2	1.57143	5	3	3	8	0	1	22	4	1	3	3	9	3	3	5.5	6.5	5.5	5.66667	6	6.16667	4.77778	6.375	5.28571	3.69231	4.16667	3.83333	4	95.6667	0
Female	194	1	55	67.1	6	0	2	6	0	0	4	2	2	2	4	4	2	2.85714	4	5	4	18	0	1	18	1	1	1	0	1	2	2	4.66667	5.25	5.5	3.5	5	6.16667	4.11111	4.75	3.28571	3.92308	3.16667	4.16667	4	79.3333	0
Female	196	1	50	61	6	1	2	7	1	0	5	2	3	3	4	4	4	3.57143	2	4	5	26	0	1	20	2	3	2	1	4	0	2	6.33333	3	6.83333	5	4.25	7	6.11111	6.5	6.42857	3.61538	2.83333	4.83333			0
Male	197	1	50	50	6	3	0	9	0	0	5	1	1	2	4	4	3	2.85714	4	5	5	18	0	1	19	1	3	1	0	1	1	1	6.66667	2.25	4.83333	5.5	5	5.83333	6.22222	4.625	5.57143	4.23077	3.16667	4.5			1
Female	198	1	50	61	9	0	2	9	0	0	4	4	4	4	4	3	5	4	1	4	2	8	0	1	20	2	1	1	1	4	0	2	1.83333	1	1.5	3.66667	5.25	6.16667	1.33333	3.125	1.14286	4.76923	4.66667	4.5	4	86.3333	0
Female	201	1	65	79.3	9	1	0	10	1	0	4	4	5	5	5	4	3	4.28571	1	4	4	8	0	1	21	4	1	4	3	11	3	3										4.07692	3.33333	4.33333			0
Male	202	1	60	60	7		2	7	0	0	5	4	4	3	4	3	4	3.85714	2	5	5	18	0	1	19	1	1	1	0	1	2	2	5.66667	2.5	5.33333	4.83333	5.5	6.66667	4.66667	6	4.85714	4.38462	4	4			1
Male	204	1	57.5	57.5	8	2.5	2	10.5	0	0	4	3	5	4	5	4	3	4	5	5	5	23	0	1	19	1	1	1	0	1	2	2	4.16667	2.25	5.33333	6.16667	6	6.33333	4.44444	6.25	5.14286	4.69231	4.66667	5			1
Female	206	1	50	61	6		0	6	0	0	3	3	5	5	5	4	3	4	4	4	2	8	0	1	19	2	3	2	1	5	0	2	4.83333	4.25	6	5.16667	6	6.83333	5.11111	6.25	5.42857	4.53846	3.33333	5			0
Male	207	1	75	75	7	1	0	8	0	0	4	2	4	4	3	2	3	3.14286	4	5	5	13	0	2	19	2	1	2	2	6	0	2	5.66667	3.75	6.33333	7	7	7	5.88889	7	5.85714	5	4.16667	4.66667			1
Female	208	1	45	54.9		0	0		0	0	5	1	1	3	3	2	3	2.57143	1	5	5	13	0	1	19	2	3	2	1	5	0	1													1	12.6667	0
Female	210	1			6	2	5	8	0	0	4	1	1	1	4	3	2	2.28571	4	5	5	13	0	4	19	4	3	2	2	6	0	0	6.33333	6.25	4.83333	3.83333	4.5	6.16667	4.44444	4.75	3.85714	4	3.5	4.66667	1	5.66667	0
Male	211	1	55	55	7	2	5	9	0	0	5	1	1	5	5	5	5	3.85714	5	5	1	18	0	1	18	1	3	1	0	2	0	0	4.83333	4.5	7	4.33333	4.25	6.33333	3.66667	6.375	4.14286						1
Male	212	1	45	45	7	0.5	5	7.5	0	0	3	1	1	3	3	4	3	2.57143	5	4	5	8	0	1	19	2	3	1	1	3	0	2	2.66667	1	4.16667	3.16667	4.5	4.66667	3	3.375	4						1
Male	214	1	70	70	10	10	2	20	1	0	4	1	1	2	3	2	2	2.14286	2	4	4	18	0	1	20	2	3	2	1	5	0	1	3.33333	1.75	4.33333	3.5	6.75	6.16667	4.22222	4.25	2.57143	4.92308	4.83333	5	2	46.8468	1
Male	215	1	75	75	10	1	2	11	0	0	5	4	4	5	4	2	3	3.85714	4	5	5	23	0	1	21	4	3	3	4	11	0	1										4.38462	3.83333	4.33333			1
Male	216	1	80	80	12	2	2	14	0	0	4	2	2	3	3	4	4	3.14286	4	4	4	18	0	2	22	4	3	4	4	12	0	0	3.16667	1.75	2.83333	4	3.5	6	6.44444	5.125	6.71429	3.61538	3.16667	4.16667			1
Female	217	1	70	85.4	9	0	2	9	0	0	5	3	4	4	4	2	2	3.42857	1	5	5	18	0	1	21	3	1	2	1	5	2	2	6	4.5	4.83333	2.66667	5.75	6.66667	6.22222	6.375	5.85714	4.30769	4	4.5	4	96.6667	0
Male	218	1	95	95	12	0	10	12	1	0	5	4	4	4	5	2	4	4	2	4	3	8	0	2	21	4	3	3	2	8	0	2	3.5	3.25	3.33333	4.83333	5.5	6.66667	4.77778	5.625	5.42857	4.38462	3.66667	4	3	66.0661	1
Male	219	1	55	55	7	0	2	7	0	0	5	4	3	4	4	3	4	3.85714	1	5	5	18	0	1	19	2	3	2	1	5	0	1	5.5	4.25	5.16667	4.66667	6	6.83333	3.55556	5	4.57143	4.23077	3.5	4.16667			1
Male	220	1	85	85	12	0	2	12	0	0	3	2	3	5	5	1	4	3.28571	5	4	2	2.5	0	1	22	4	3	2	0	2	0	0	1	1	3.83333	5.16667	4.5	6.16667	1	5.25	3.28571	4.69231	5	4.66667			1
Male	221	1	70	70	7	0	2	7	0	0	4	2	4	5	5	5	4	4.14286	5	5	5	23	0	2	20	2	3	2	1	4	0	2	6.5	3.5	7	5.5	6.5	7	6	7	5.57143	5	4.33333	5	2	30.03	1
Male	222	1	70	70	12	1	5	13	0	0	5	3	5	3	4	3	5	4	5	5	5	23	0	2	22	4	2	2	3	8	0	0	6.33333	1.25	5.33333	2.83333	4	6.33333	6.11111	6.25	5.42857	3.76923	3.16667	4.83333			1
Female	223	1			7	1	0	8	0	0	4	2	2	2	5	4	4	3.28571	3	5	5	18	0	1	19	1	1	1	0	2	0	1	5	4.25	4.5	3.5	4.5	6.83333	6.11111	6.375	4.85714	3.61538	2	5			0
Female	225	1	55	67.1	7	3	2	10		0	2	1	1	1	1	2	2	1.42857	2	4	5	13	0	2	20	3	1	3	3	9	0	0	4.83333	4	4.33333	3.16667	3.25	4.33333	3.55556	3.875	3.42857	3.92308	3.66667	4			0
Female	226	1	57.5	70.15	6	2.5	5	8.5	0	0	4	1	4	1	2	5	5	3.14286	5	5	3	26	0	1	21	3	3	2	1	4	2	3	1	1	6	7	7	7	1	4.75	1	4.61538	3.5	4.83333	2	36.3333	0
Male	227	1	50	50	6	0	0	6	0	0	3	1	2	3	4	3	1	2.42857	4	1	1	18	0	1	19	1	1	1	0	2	0	1	5.5	4	5.16667	5.33333	6.25	6.83333	5.11111	5	5.28571	4.07692	4.66667	3.5			1
Male	229	1	70	70	3	0	2	3	1	0	5	3	5	5	5	1	4	4	2	3	2	8	0	3	23	4	1	3	4	11	3	2	3.83333	3.25	3.33333	3.5	4.75	6	3.11111	3.75	3.28571						1
Male	230	1	125	125	13	0	2	13	0	0	2	3	4	5	5	3	2	3.42857	1	4	4	18		1	22	4	1	0	3	5	0	1	2	1	1.16667	1	2.25	5.66667	1	1.5	1	3.84615	2.33333	4	4	88.5886	1
Male	232	1	90	90	14	5	2	19	0	0	5	5	5	5	5	4	4	4.71429	2	4	3	13	0	1	20	2	1	1	1	2	0	0	4.16667	4	3.33333	4.83333	5.75	6.16667	2.77778	4.75	2.57143	3.61538	3.66667	4.16667	4	84.6847	1
Male	233	1	55	55	7	7	5	14	0		3	2	2	5	5	4	3	3.42857	5	3	2	13		1	20	3	3	3	2	6	0	1	3.66667	4.5	4.33333	5.5	5.25	5.5	4.55556	5	4	4.30769	4.16667	4.16667			1
Female	235	1	50	61	7	2	2	9	0	0	4	1	1	1	2	3	2	2	5	5	5	18	0	2	19	2	1	2	1	5	0	1	3.83333	2.75	4.83333	4.33333	4.75	5.66667	3	5	3.57143	4.23077	3.83333	4.16667	2	39.3333	0
Male	236	1	71	71	7	2	0	9	0	0	4	4	5	5	5	4	2	4.14286	1	5	4	18	0	1	18	1	1	1	0	2	2	3	6.5	5	6.83333	5.5	6.5	6.33333	6	6.5	6.42857	5	4.66667	5	3	72.6727	1
Female	237	1	55	67.1	7	0	2	7	0	0	3	2	3	4	4	3	2	3	2	5	5	26	0	2	19	1	1	1	0	1	0	1	3.83333	2.5	4.66667	2.83333	3.5	5.33333	4.11111	3.625	1.85714	3.76923	3.33333	3.66667			0
Female	238	1	45	54.9	6	0	2	6	0	0	5	2	3	4	4	2	4	3.42857	2	5	5	8	0	1	19	1	3	1	1	3	0	1	3.5	3	5.66667	5.33333	5.25	6.66667	2.55556	4.625	3	4.46154	3.5	4			0
Male	239	1	60	60	5	1	8	6	0	0	5	5	5	5	5	4	5	4.85714	4	5	4	18	0	1	19	2	1	0	1	3	3	3	5.66667	4.25	4	4.5	5	5.5	4.66667	4.875	4.14286						1
Male	240	1	70	70	7	0	0	7	0	0	4	3	2	4	4	4	3	3.42857	4	5	4	13	0	3	20	1	1	1	0	2	1	1													2	34.8348	1
Female	241	1	50	61	7	3	2	10	0	0	5	3	5	5	5	3	4	4.28571	1	5	5	18	0	2	20	2	3	2	0	4	0	2	6.83333	6.75	6	6.83333	6	7	6	6.875	4.71429	5	5	5	2	29	0
Male	242	1	50	50	6	0	2	6	0	0	5	2	2	5	5	2	4	3.57143	4	5	5	26	0	1	18	1	3	1	0	2	0	1										4.46154	3	4.83333			1
Male	243	1	50	50	7	1	2	8	0	0	4	1	1	3	4	4	4	3	4	5	5	13	0	2		1	3	1	1	2	0	2	4.5	2.5	4.66667	4.33333	4.75	5.33333	3.66667	4.875	5	4	3	4			1
Male	244	1	70	70	13	2	5	15	0	0	3	2	3	4	4	2	2	2.85714	5	5	4	13	0	2	20	2	1	1	2	4	2	2	5	3	3	3.83333	6.5	6.5	4.11111	4.625	4.42857	4.15385	4	3.66667			1
Male	245	1	70	70		1	0		0	0	4	3	4	4	4	4	4	3.85714	2	4	4	23	0	1	22	5	1	4	4	12	0	1	4	1.5	1.5	3	4.5	6.33333	2.77778	4.5	4				4	87.988	1
Male	246	1	75	75	9	0	2	9	0	0	3	2	2	3	4	4	3	3	3	5	5	18	0	2	22	4	3	4	4	12	0	1	4	1.5	4.5	1.33333	2.25	5.16667	4	3.875	4.57143	3.23077	1.5	4.5	2	36.9369	1
Female	247	1	40	48.8	6	1	0	7	0	0	5	3	3	4	5	4	5	4.14286	1	5	4	18	0	1	21	3	2	3	2	8	2	2	6.33333	4.25	6	5.83333	5.75	6.16667	5.77778	6.125	6	4.61538	4.66667	4.66667			0
Male	248	1	58	58	7	1	0	8	0	0	5	1	1	3	5	4	5	3.42857	1	5	5	13	0	1	19	1	3	1	1	3	0	1	4.5	2.75	1.83333	1.83333	5.5	6.83333	3.33333	3.875	3.71429	4.92308	3.66667	4.83333	1	4.2042	1
Male	249	2	75	75	7	0	2	7	0	0	4	1	1	3	4	4	3	2.85714	2	4	5	13	0	1	21	3	3	3	2	8	0	1	6	4	5.16667	3.66667	5.5	6	3.77778	5.875	5.71429	4.07692	2.83333	4.66667			1
Female	250	1	62.5	76.25	10	0.5	2	10.5	1	0	5	2	1	4	4	3	4	3.28571	1	4	5	26	0	1	22	5	2	4	3	11	2	2	3.5	2.25	2.66667	1.16667	1.75	5.5	3.66667	3.875	4.57143	3.84615	2	3.66667	2	47.6667	0
Male	252	2	50	50	6	0	0	6	0		2	1	2	2	5	2	5	2.71429	1	4	5	23	0	1	19	1	3	1	0	2	0	3	3	1.25	1.83333	2.5	6.25	7	2.77778	4.75	2	4.61538	3	4.66667			1
Male	253	1	80	80	9	0	2	9	1	1	1	1	1	3	3	3	1	1.85714	4	5	5	13	0	3	24	5	1	4	3	10	3	3										3.84615	3.83333	4.83333	4	98.7988	1
Male	254	1	63	63	9	1	2	10	1	0	2	2	4	5	3	5	3	3.42857	4	5	5	13	0	2	21	3	1	3	2	7	2	3										4.69231	4.33333	4.83333	4	75.6757	1
Male	255	1	50	50	7	2	0	9	0	0	4	1	1	1	3	3	4	2.42857	2	4	5	13	0	1	19	1	3	1	0	1	0	0	6.16667	4.5	4.5	3.66667	3.75	6.16667	5.66667	5.5	5.42857	2.92308	2.66667	3.83333			1
Male	256	1	65	65	7		2	7	0	0	5	2	2	4	4	5	4	3.71429	5	5	5	18	0	2	22	4	3	3	3	9	0	1	5.83333	3.25	4.83333	5.16667	5.25	6.5	5.88889	6.375	6.28571	4.46154	4	4.16667			1
Female	257	1	40	48.8	5	1	2	6	0	0	4	1	1	1	4	3	3	2.42857	2	5	5	23	0	1	19	1	3	1	0	2	0	2	2.66667	1.5	1	1	4.75	4.66667	3.66667	3.5	2.71429	4.53846	2.5	4.66667			0
Female	258	1	40	48.8	10	1	5	11	1	0	4	2	3	4	4	3	4	3.42857	1	5	4	13	0	1	19	1	3	0	0	1	0	2	4.33333	3.75	5.16667	4.16667	4	6.66667	2.77778	4.875	3.42857	3.69231	2.83333	4.16667	2	48	0
Female	261	1	65	79.3	11	2	0	13	0	0	4	1	1	5	5	3	4	3.28571	1	5	5	13	0	1	21	3	1	3	2	8	2	3	5.5	6	6.66667	4.5	4.75	6.83333	5.66667	6.625	6.28571	4.07692	3.5	4.66667	4	76.3333	0
Female	262	1	78	95.16	7	7	5	14	0	0	5	2	2	5	5	5	5	4.14286	5	5	5	8	0	1	21	4	1	3	3	9	2	0	5.83333	5.25	3.83333	2.66667	7	7	2.66667	5.375	2.28571	4.30769	3.5	4.66667	3	70.6667	0
Male	263	1	55	55	6		0	6	0	0	4	2	3	5	5	5	4	4	1	2	2	2.5	0	1	20	2	3	2	2	6	0	2	1.83333	1	3.66667	1.33333	4	6.83333	5	1.5	1.71429	4.30769	2.5	5			1
Female	264	1	47	57.34	8	3	5	11	1	1	5	5	5	5	5	4	5	4.85714	5	4	3	26	0	1	22	6	1	5	4	14	2	1	3.5	1.25	5	5	7	7	5.55556	6.75	4.71429	4.76923	4	4.66667			0
Female	265	1	43	52.46	8	1	0	9	0	0	4	1	2	2	2	2	2	2.14286	2	4	2	13	0	2	20	3	3	3	3	9	0	1	4.83333	1.75	4.83333	3.33333	3	5.5	5.33333	4.625	2.85714	3.76923	3	4.16667	1	23	0
Female	266	1	40	48.8	6	4	2	10	0	0	4	3	3	5	5	4	3	3.85714	5	4	4	2.5	0	1	19	1	1	1	1	3	2	2	6.16667	6.75	3.83333	6	4.5	6.66667	5.22222	6.125	4.14286	4.07692	4.16667	4.33333	1	15	0
Female	268	1			6	3	2	9	0	0	3	2	1	4	3	3	3	2.71429	3	4	5	13	0	1	20	2	3	1	0	1	0	1	5.5	6	6.16667	4.5	5.25	6	5.11111	6.5	5.57143	3.38462	2.66667	3.83333			0
Female	269	1	55	67.1	9		0	9	1	0	5	5	5	5	5	3	4	4.57143	1	3	2	8		1	20	3	1	3	2	8	3	2	6.16667	5.75	7	7	6.5	7	6.11111	7	6.42857	5	5	5	4	88.6667	0
Female	270	2	45	54.9	6	3	5	9	0	0	5	3	3	5	5	5	1	3.85714	5	4	3	18	0	1	22	4	1	2	0	4	3	3	4.16667	3.25	5.66667	2.33333	4.25	4.66667	4.22222	5	2.71429	3	3	3	4	88	0
Female	272	1	50	61	8	2	2	10	0	0	3	2	3	2	4	2	2	2.57143	2	5	5	18	0	1	19	2	1	1	0	2	0	0	3.83333	3	3.5	2.33333	2.5	5.33333	2.55556	4.375	4.28571	3.46154	2.5	3.66667	3	62	0
Male	274	1	65	65	9	2	2	11	0	0	5	2	2	3	4	5	4	3.57143	4	5	5	13	0	1	21	3	3	3	2	7	0	2	4.66667	4.5	4.83333	3.83333	4.75	5.16667	3.44444	3.75	3.71429	4.23077	3.83333	4.33333	3	54.6547	1
Male	275	2	90	90		2	8		0	0	4	4	4	5	4	5	4	4.28571	5	4	3	2.5	0	1	23	5	2	4	4	12	2	3	3.5	4.25	5.83333	5.83333	6	6.66667	3.44444	5.625	5.42857	4.92308	4	4.66667	3	55.8559	1
Male	277	1	92	92	12	0	2	12	0	0	3	1	3	5	5	4	3	3.42857	1	3	2	2.5	0	3	23	5	1	4	4	11	1	1	4	2.5	6.33333	4.16667	5.5	6.33333	5.66667	6	5.71429	4.38462	2.5	4	4	92.7928	1
Male	278	1	75	75	12	3	8	15	0	0	4	1	1	2	2	3	1	2	5	5	5	26	0	1	22	4	3	4	4	12	0	0	6.5	3.75	4	2.33333	4	6.16667	6.11111	4	4	3.76923	3.16667	4.83333	2	25.5255	1
Female	279	1			7	1	0	8	1	0	2	1	2	1	4	5	2	2.42857	1	5	5	23	0	5	20	3	3	3	2	8	0	0													3	57.6667	0
Male	280	1	70	70	6	0	2	6	0	0	4	3	4	4	4	2	2	3.28571	4	5	5	18	0	2	20	2	1	2	1	5	2	2	4.66667	2	5.16667	6.16667	3.75	3.66667	2.66667	5.75	5.85714	4.92308	5	4.83333			1
Male	281	1	87.5	87.5	10.5	2.5	2	13	0	0	4	3	3	4	4	3	3	3.42857	2	4	4	13	0	3	21	3	1	3	2	6	2	3	3.33333	2	2	2	2.5	3.83333	2.33333	2.5	2	3.92308	3.66667	3.83333	3	52.5526	1
Female	282	1	47	57.34		3	2		0	0	5	2	1	3	5	4	4	3.42857	4	4	4	23	0	1	19	2	1	1	0	2	0	0	3.5	3	3.5	4	6.25	6.33333	2.11111	4.125	4.14286	4.92308	4.66667	4.5	1	3	0
Male	284	1	105	105	9.75	0	0	9.75	0	0	5	5	5	5	5	2	5	4.57143	1	3	3	8	0	1	20	3	1	3	2	8	0	1	4.16667	2.25	3.66667	2.5	5.25	6.33333	3.22222	3.75	4.42857	4.69231	3.5	4.66667	4	93.6937	1
Female	285	1	55	67.1	5	2	2	7	0	0	4	1	1	2	3	4	3	2.57143	4	4	4	13	0	1	18	1	1	1	0	2	0	0										3.38462	3	4	3	58	0
Male	287	1	60	60	7	1	0	8	0	0	4	1	1	5	5	4	3	3.28571	3	5	5	13	0	1	19	1	3	1	1	3	0	1	5	3.25	4.5	4	6.75	7	4.77778	5.25	5.42857	4.84615	4.66667	4.83333	1	22.8228	1
Male	288	1	75	75	9	0	2	9	0	0	5	5	5	5	5	3	5	4.71429	3	3	2	2.5	0	2	20	2	1	1	1	3	0	2	3.5	1.75	2.5	3	6.75	7	3.11111	4.75	3.71429	5	5	4.83333			1
Male	289	1	65	65	7	0	0	7	1	0	1	1	1	1	3	4	4	2.14286	1	5	5	26	0	1	18	1	3	1	1	3	0	2	6.16667	4.75	3.5	5.66667	6.5	7	6.33333	6.375	5.57143	4.84615	5	5	1	11.4114	1
Male	290	1	65	65	7	0	5	7	0	0	4	3	5	4	5	1	2	3.42857	2	4	3	8	0	1	23	5	1	3	3	10	2	1	4	1.5	1.33333	3.83333	4.75	6.33333	1	3.25	2	4.38462	3.5	4.33333			1
Female	291	1	45	54.9	6	0	0	6	0	0	2	2	4	5	4	4	3	3.42857	2	5	5	13	0	2	20	2	1	2	1	5	0	2	3.16667	3	3.16667	2.16667	3.25	5.83333	2.22222	4	3.57143	4.69231	3.66667	4.66667			0
Female	292	1	30	36.6	7	0	5	7	0	0	4	2	1	2	2	2	2	2.14286	5	4	3	8	0	1	21	3	1	1	2	6	2	1	2	2.5	3.66667	4	3.25	5.33333	2.77778	5.375	3.71429	3.53846	3.5	4			0
Male	293	1	70	70	8	4	2	12	0	0	2	2	2	4	4	3	4	3	4	4	4	13	0	3	21	2	1	2	2	5	0	2	6.33333	3.25	6	2.66667	6	6.33333	3.88889	3.875	3.85714	3.84615	3.16667	4.16667			1
Male	296	1	80	80	11	2	2	13	0	0	2	1	3	1	4	4	4	2.71429	3	4	5	23	0	1	18	2	3	2	1	5	0	1	5.16667	2.75	5.66667	3.83333	4.25	6	4	4.75	3.71429	4.23077	3.33333	5			1
Male	297	1	70	70	8	0	2	8	1	1	3	1	1	4	3	1	1	2	1	5	5	18	0	1	21	4	3	4	3	9	0	3										5	5	4.16667	4	83.4835	1
Female	298	2	50	61	8		2	8	0	1	4	5	5	5	5	2	2	4	3	5	5	23	0	1	19	2	1	2	1	5	3	3										5	4.5	4.83333	4	89.6667	0
Female	299	1	45	54.9	6	1	0	7	0	0	4	1	1	2	2	2	3	2.14286	1	5	5	8	0	2	19	2	3	2	2	5	0	0	5.66667	5	6	3.16667	3.75	5.66667	6.11111	5.75	5.85714	3.61538	2.16667	4.16667	1	18.6667	0
Male	300	1	55	55	8	1	2	9	0	0	4	2	3	2	3	4	2	2.85714	4	4	4	13	0	2	18	1	1	0	0	1	2	3	3	2.25	4.16667	5.66667	4.75	5.33333	4.77778	3.625	4.42857	4.30769	3.83333	3.66667			1
Male	302	1	50	50	6	0	0	6	1	0	5	2	2	4	4	4	4	3.57143	3	5	5	8	0	1	19	1	3	1	0	1	0	0	4.66667	2.75	2.66667	3.66667	6.75	6.83333	4.77778	4.75	2.85714	4.92308	2.83333	4.83333	1	4.5045	1
Male	304	1	50	50	7	3	0	10	0	0	3	1	1	4	5	5	4	3.28571	1	5	5	13	0	2	20	3	3	3	2	6	0	2	3.83333	5.25	5.5	5.33333	4.75	6.83333	2.88889	6.25	4.28571	4.92308	4	5			1
Female	305	1	54	65.88	7	3	0	10	0	0	5	4	4	5	5	4	4	4.42857	1	4	4	8	0	1	20	2	1	2	0	4	1	2	5.66667	3.5	3.5	5	5	7	3.77778	4	5.42857	4.92308	3.66667	5	3	74.6667	0
Female	306	1	40	48.8	6	1	2	7	1	0	5	2	3	4	4	2	3	3.28571	3	5	5	13	0	3	21	3	3	2	2	7	0	2	6.66667	5.75	5.33333	5.5	5.75	7	4.55556	6.5	5.42857	4.69231	4.5	5			0
Female	307	1	52	63.44	9	3	2	12	0	0	4	1	1	3	2	3	2	2.28571	5	5	5	18	0	1	22	6	1	3	2	6	0	3	6.33333	6.25	5.5	6.16667	6.5	6.83333	6.11111	6.5	6.85714	4.61538	4.33333	5	3	74	0
Female	308	1	45	54.9	6	1	2	7	0	0	2	1	1	1	3	4	4	2.28571	3	5	5	18	0	1	22	4	1	3	3	11	0	3	3	4	3.16667	5.5	6	6.33333	3.55556	6.125	4.42857	4.30769	4.16667	4.16667			0
Female	310	1	65	79.3	9	2	2	11	1	0	4	1	1	1	3	2	2	2	4	5	5	13	0	1	19	2	3	2	2	6	0	2													2	26	0
Male	311	1	75	75	9	1	5	10	0	0	4	1	1	3	4	3	4	2.85714	3	5	5	8	0	1	22	4	1	3	3	10	2	1										4.07692	3.5	4.83333			1
Male	312	1	65	65	7	0	0	7	0	0	4	1	1	2	2	2	2	2	2	5	5	8	0	1	22	4	3	4	4	12	0	2	5	3.25	4.83333	2.66667	4.25	6.83333	3.44444	4.5	3.42857	4.46154	3.83333	4.66667			1
Male	315	1	50	50	7	3	5	10	1	0	4	2	2	4	3	5	2	3.14286	5	4	2	2.5	0	1	21	3	3	2	2	6	0	3	3	3.25	4.5	3.83333	7	6.83333	2.22222	3.5	2.14286	5	5	4			1
Female	317	1	65	79.3	6	7	2	13	0	0	4	1	1	4	4	4	5	3.28571	3	5	5	13	0	1	20	2	3	1	1	3	0	0	5.5	5.5	5.16667	2.33333	3	5.66667	4.44444	5.125	3.42857	2.84615	2.16667	4.66667	1	11.3333	0
Female	318	1	35	42.7	6	1	0	7	1	0	4	1	1	1	1	1	2	1.57143	1	5	1	18	0	3	22	3	3	3	3	9	0	3	4.83333	5.5	4.33333	4.16667	4.75	6.33333	4.22222	5.5	3.71429	4.46154	2	4.83333	1	8.33333	0
Female	319	1	60	73.2	5	10	2	15	0	0	5	2	1	1	3	3	5	2.85714	4	5	5	26	0	1	22	4	3	4	4	12	0	2	3.83333	1	2.5	1.16667	4.5	7	3.66667	4.625	2.57143	4.30769	2.33333	4	3	67.6667	0
Female	320	1	60	73.2	12	2	5	14	0	0	3	1	1	2	4	2	3	2.28571	5	4	4	13	0	1	21	4	1	2	1	5	0	2	4.83333	3.75	2.83333	4.66667	5	6	4.22222	4.375	4.42857	3.69231	3	4	1	16	0
Female	321	1	50	61	7	1	0	8	0	0	4	2	5	5	5	2	3	3.71429	2	5	5	26	0		19	2	3	2	1	5	0	2	3.16667	2.25	6	4.16667	5	6.16667	1.88889	5.625	3.14286	4.76923	3.83333	4.66667			0
Male	322	1	45	45	6	0	0	6	0	0	2	1	1	4	3	2	4	2.42857	1	4	4	13	0	1	20	2	3	2	2	6	0	1	2.5	1.25	3.33333	1.33333	3	4	1.11111	1.75	1.57143	4.23077	2.66667	4.5			1
Male	324	1	70	70	9	9	0	18	1	0	5	4	4	4	5	4	4	4.28571	1	4	4	8	0	2	20	3	3	3	3	9	0	2										4.46154	3.33333	4.33333	2	43.8438	1
Female	325	1	45	54.9	7	1	5	8	0	0	4	2	1	3	3	5	2	2.85714	5	5	5	13	0	1	22	4	1	3	4	9	2	2	6	4.25	5.16667	3.83333	3.5	4.83333	5.77778	5.875	5.71429	3.61538	3.16667	4.16667	3	60	0
Female	326	1	40	48.8		1	2		1	0	1	5	5	5	2	2	4	3.42857	3	5	5	13	0	1	21	4	2	4	3	7	3	2	6.5	6.75	4	4.83333	4	4.83333	6.66667	6.25	6.42857				2	38.3333	0
Male	327	1	50	50	6	3	2	9	0	0	5	2	2	3	4	3	4	3.28571	2	5	5	26	0	2	19	2	3	2	1	5	0	1	5.66667	1.75	3.66667	2.5	6	7	4	3.5	1.57143	4.53846	2.83333	4.83333	3	63.0631	1
Female	330	1	65	79.3	8	1	5	9	1	0	5	5	5	5	5	5	5	5	3	4	4	8	0	1	21	4	1	3	3	10	2	2	5	3.25	4.83333	4.5	5	6.33333	4.33333	5.375	4	3.92308	3.83333	3.83333	4	90	0
Female	332	1	60	73.2	9	1	2	10	0	0	5	3	4	4	5	5	5	4.42857	5	5	5	18	0	1	20	3	1	2	1	5	0	0	5.16667	5.5	5.16667	6	6.25	7	5.44444	6.75	5.85714	4.84615	4.5	4.83333	3	54.3333	0
Male	333	1	68	68	9	0	0	9	1	0	1	1	1	1	1	2	2	1.28571	1	3	3	2.5	0	2	20	3	1	3	2	8	2	1	3.16667	1.75	4.16667	4.83333	6	4.66667	2.66667	4	2.42857	4.07692	3.83333	3.5	2	37.5375	1
Male	334	1	80	80		2	2		1	1	5	2	3	5	5	5	4	4.14286	2	3	1	2.5	0	1	18	1	1	1	0	2	0	2										4.46154	4.16667	4.33333			1
Male	335	1	55	55	7	1	0	8	0	0	4	3	3	4	4	4	4	3.71429	2	5	5	13	0	1	19	1	3	1	1	3	0	1	4.5	4.75	4.66667	2.16667	6	6.5	4.44444	4.125	3.14286	3.69231	2.83333	3.83333			1
Female	336	1	35	42.7	6		2	6	0	0	3	1	2	2	4	3	4	2.71429	4	2	3	18	0	1	20	2	1	2	1	5	0	0	5.5	3.25	3.16667	4.16667	3.25	6.33333	5.22222	6.625	6	3.46154	2.66667	4.33333	1	19.6667	0
Male	337	1	65	65	7	0	0	7	1	0	5	2	2	5	5	4	5	4	1	5	5	18	0	1	21	3	3	3	3	8	0	1	4	2.25	3.66667	2.33333	6.25	6.66667	2	4.25	2.28571	4.92308	4	4.83333	2	41.1411	1
Female	339	1	65	79.3	10	2	0	12	0	0	4	1	1	4	3	2	2	2.42857	1	5	5	8	0	2	21	4	2	3	4	7	0	2	6.16667	4	5.66667	4.33333	3	5.5	3.22222	4.375	3.85714	3.76923	2.83333	4.33333	3	70	0
Female	340	1	55	67.1	6	1	2	7	0	0	3	1	4	4	3	5	3	3.28571	1	3	3	2.5	0	1	22	4	1	4	2	8	0	1	3.5	4.75	2.66667	3	2.25	4.83333	3.11111	4.75	3.57143	3.46154	2.83333	3.66667			0
Male	341	1	50	50	6	0	2	6	0	0	4	1	1	2	2	4	4	2.57143	3	5	5	13	0	1	18	1	3	0	0	1	0	1	4.83333	2	3.33333	2	4.25	5	3.66667	2.625	2.85714	3.46154	3	3.16667			1
Female	343	1	60	73.2	10	4	5	14	0	0	2	1	1	1	1	3	2	1.57143	4	5	5	23	0	2	20	2	3	2	2	6	0	1	3.33333	4.5	3.5	3.66667	2	4.5	4.22222	5	4.42857				2	35.3333	0
Female	344	1	50	61	7	1	2	8	0	0	2	1	1	2	1	1	1	1.28571	2	4	5	23	0	1	19	2	3	2	1	5	0	0	5.33333	4.5	6	2.33333	2.5	6	3.66667	5	4	3.69231	3.33333	4.16667	2	32.6667	0
Male	345	1	140	140	14	0	0	14	0	0	5	4	5	5	5	4	4	4.57143	1	5	5	26	0	2	22	4	3	2	3	8	0	1	6	5.5	6.83333	4.83333	6.75	7	5.88889	6.75	5.28571	4.92308	4.83333	5	4	85.2853	1
Male	346	1	60	60	7	0	2	7	0	0	3	1	1	3	3	3	1	2.14286	1	5	5	13	0	1	18	1	3	1	0	2	0	2	6.83333	1.5	4	4.33333	6	6.66667	2.22222	3.375	2.28571	4.38462	4	1.66667			1
Male	350	1	80	80	12	2	2	14	0	0	4	4	5	5	5	3	4	4.28571	2	2	2	2.5	0	1	20	2	1	1	1	3	2	2	2.83333	1.25	2.16667	1.66667	6.25	6.83333	1.22222	2.75	2.28571	4.15385	3.5	4.16667			1
Male	351	1	75	75	9	0	0	9	1	0	4	1	1	1	3	1	1	1.71429	1	4	4	18	0	1	21	3	3	3	2	8	0	0	2.83333	1.25	2.5	2.83333	5.75	6.33333	4.22222	6.125	3.14286	3.84615	3	3.33333	3	51.6517	1
Male	352	1	50	50	7	1	0	8	0	0	4	3	3	5	5	3	4	3.85714	1	5	5	18	0	1	19	1	3	1	1	3	0	1													1	1.8018	1
Female	355	1	35	42.7	5	2	0	7	0	0	3	2	2	2	3	3	3	2.57143	3	4	4	8	0		19	1	3	1	0	2	0	2	4.83333	5	5.66667	4.5	3	5.33333	4.11111	5.125	4	3	2.66667	3.83333	1	12.3333	0
Male	356	1	45	45	6	1	2	7	0	0	2	2	4	4	3	2	3	2.85714	4	5	5	18	0	2	19	1	1	0	1	2	0	1	1.83333	1	1	1	3.75	5	4	2	1.85714	4.46154	4.5	3.83333			1
Male	357	1	42.5	42.5	7	2.5	0	9.5	0	0	4	2	2	5	4	5	3	3.57143	1	5	5	13	0	1	18	1	3	1	0	2	0	2										5	4	5			1
Male	358	1	70	70	6	0	2	6	0	0	3	4	5	5	5	1	3	3.71429	1	4	3	13	0	1	18	1	1	0	0	0		3	4.33333	4	4	3.66667	6	6.33333	2.33333	4.5	2.71429	4.84615	4	4.5			1
Female	359	1	40	48.8	7	0	0	7	0	0	4	2	2	2	4	4	2	2.85714	4	4	4	8	0	2	20	2	1	1	1	3	0	1	6	4.75	7	6.83333	6	7	7	7	6	4.61538	2.83333	4.5			0
Male	360	1	70	70	8		8	8	0	0	5	3	3	5	5	5	3	4.14286	5	5	5	2.5	0	1	18	1	1	1	1	3	0	2	4.5	1.25	3.66667	7	7	7	3.88889	7	4.71429	5	4	5			1
Male	362	1	85	85	10	0	2	10	0	0	2	1	1	3	5	4	4	2.85714	3	5	5	18	0	1	21	3	3	3	2	8	0	1													1	21.3213	1
Male	363	1	80	80	9	7	2	16	1	0	5	5	5	5		4	5		2	3	1	8	0	2	20	2	1	1	0	1	2	3	1	1	1.83333	5.5	6.75	6.5	5.22222	6	4.85714	4.92308	4.33333	5	3	66.3664	1
Male	364	1	90	90	2		0	2	0	0	3	3	2	5	4	5	2	3.42857	1	5	4	2.5	0	1	21	3	1	2	1	5	2	2													4	88.8889	1
Male	365	1	70	70	10	2	2	12	0	0	1	1	1	1	5	3	1	1.85714	5	5	1	2.5	0	1	20	2	3	2	2	6	0	0										4.92308	4.66667	5			1
Male	366	1	65	65	7	0	2	7	0	0	4	1	1	3	4	4	3	2.85714	2	5	5	18	0	1	21	4	1	3	4	11	0	1	6.33333	2.5	4.16667	4.33333	5.25	5.83333	5.11111	5.125	2.85714	4.38462	3.33333	4	2	44.1441	1
Female	367	1	40	48.8		5	2		0	0	5	1	1	3	2	3	5	2.85714	2	5	5	26			19	2	3	2	1	5	0	1	5.5	2.75	6.16667	2.16667	5	6.16667	6.11111	5	4.42857	4.46154	3.66667	5			0
Male	368	1	69.5	69.5	11	0	0	11	0	0	2	1	1	1	1	1	2	1.28571	3	5	5	26	0	1	21	3	3	3	3	9	0	1	3.33333	3.25	4.5	3	4.75	5.83333	4	5.375	4	3.84615	3.5	3.16667			1
Female	369	1	40	48.8	7		0	7	0	0	1	1	1	1	2	3	4	1.85714	2	5	5	23	0	1	19	1	3	1	0	1	0	0	3.83333	2	2.66667	1	1.75	4.16667	5.44444	4.5	5.85714	2.23077	2.16667	4.33333	1	0.666667	0
Male	370	1	70	70	6	3	2	9	1	0	5	5	5	5	5	4	4	4.71429	4	5	5	26	0	1	21	2	1	2	1	3	0	3	4.83333	2.5	5.83333	2.83333	6	6.83333	5.44444	6.125	6.57143	4.84615	3.66667	5			1
Male	371	1	80	80	7	1	2	8	0	0	3	1	1	2	4	2	2	2.14286	4	5	5	18	0	2	20	2	1	2	2	4	0	2	3.83333	1.25	3.16667	2	4	6	1.88889	3.75	1.57143	4.23077	3.33333	4	1	14.4144	1
Male	372	1	105	105	6	3	0	9	0	0	4	3	4	4	5	3	4	3.85714	2	4	4	13	0	2	20	2	2	2	2	6	2	1	4.66667	1.75	3.5	2.33333	5.5	6.5	4.44444	5.5	4.42857	3.92308	3.83333	3.5	2	39.039	1
Female	374	1	55	67.1	10	2	0	12	0	0	2	1	1	1	2	1	3	1.57143	1	5	5	18	0	1	20	2	1	2	2	6	2	2	5.83333	3.25	5.5	4.33333	5.5	7	4.33333	4.375	1	4.23077	2.5	5	3	58.6667	0
Female	376	1	44	53.68	6	4	2	10	0	0	4	1	1	1	2	1	2	1.71429	1	4	5	18	0	1	20	2	3	2	1	5	0	1	4	2.75	4.83333	4.33333	5.5	6.66667	4.11111	4.5	4.71429	4.15385	3	4.16667	2	25.3333	0
Male	377	1	85	85	12	0	2	12	0	0	4	2	3	5	5	4	4	3.85714	4	3	2	8	0	1	21	3	1	2	2	6	0	1	3.33333	1	6.66667	3.66667	6.75	7	1.33333	3.875	3.71429	4.23077	3.83333	4.16667	2	39.3393	1
Male	378	1	45	45	6	3	2	9	0	0	4	1	1	3	3	3	4	2.71429	2	4	4	2.5	0	1	20	3	3	3	0	3	0	1	5.83333	3.25	4.5	3.5	5.25	5.33333	4.44444	4.5	3.28571	3.92308	3.66667	4.33333	1	2.1021	1
Male	379	1	65	65	8	0	2	8	0	0	4	1	2	4	3	2	2	2.57143	1	5	5	23	0	1	20	3	3	3	1	6	0	1	4.33333	4	5	6.16667	6.5	7	4.22222	6	4.57143	4.76923	3.5	4.66667			1
Male	380	1	95	95	13	2	2	15	0	0	4	4	4	4	5	4	5	4.28571	2	4	3	2.5	0	2	21	4	1	4	3	11	2	2	4.33333	2.5	3.5	4.16667	5.5	6.83333	2.44444	5.5	3.71429	4.53846	4	5			1
Female	381	1	60	73.2	10	4	2	14	0	0	3		2	2	3	3	3	2.28571	1	4	2	26	0	1	21	4	3	4	3	10	0	1										3.53846	2.83333	4	3	60.3333	0
Male	382	1	60	60			0		1	0	5	3	4	4	4	4	2	3.71429	1	5	4	8	0	2	19	1	3	1	1	3	0	2	5	1.5	4.33333	4.16667	7	7	4	5.25	4.28571	4.92308	4.66667	5			1
Male	384	1	70	70	7	3	0	10	0	0	5	2	2	4	5	5	4	3.85714	2	5	5	26	0	2	18	1	3	1	0	2	0	0	6.33333	2.5	4.33333	3.33333	3.25	5.66667	6.33333	5	6.57143	3.38462	3.33333	3.66667	1	22.2222	1
Female	386	1	40	48.8	6	1	10	7	0	0	5	4	4	5	5	2	4	4.14286	5	5	5	26	0	1	18	1	1	0	0	0	0	2	5.33333	3.25	7	6.33333	5.75	7	5.66667	7	7	4.84615	4.5	4.16667			0
Male	387	1	70	70	8	0	2	8	1	0	4	2	1	5	4	5	3	3.42857	1	2	3	2.5	0	1	20	3	3	3	0	3	0	1	3.83333	2.75	5.83333	5.66667	7	6.16667	6	6.5	3.85714	4.69231	5	4.5	1	16.8168	1
Male	388	1	80	80	10	1	2	11	0	0	5	3	2	5	5	4	5	4.14286	1	4	2	13	0	1	21	4	3	4	4	12	0	0	2	1.75	2.33333	4.16667	7	7	2.66667	4.625	3.71429	4.76923	4.5	4.5			1
Male	389	1	50	50	6	6	0	12	0	0	3	2	1	1	3	3	4	2.42857	1	4	4	23	0	3	20	2	3	2	0	2	0	0										3.61538	2.5	4.66667			1
Male	390	1	35	35	3.5	0	8	3.5	0	0	5	2	1	2	2	2	1	2.14286	2	3	2	2.5	0	1	22	4	1	4	3	10	2	3	4.83333	3.5	4.66667	5.16667	5.5	5.66667	5	4.75	5.14286				2	28.8288	1
Female	391	1	40	48.8		1	2		0	0	2	2	2	4	2	2	2	2.28571	2	5	5	13	0	2	19	2	1	2	1	5	2	2															0
Male	393	1	65	65	6	0	5	6	1	0	3	1	2	3	4	5	2	2.85714	5	4	4	13	0	3	20	3	3	3	3	9	0	3	4	4.5	3	5	6.75	6.66667	3.44444	5.375	3.28571	3.92308	4.16667	4			1
Male	394	1	65	65	7	2	0	9	0	0	5	5	5	5	5	3	2	4.28571	4	4	2	2.5	0	1	19	2	3	2	1	5	0	0										4.53846	4.33333	4			1
Male	395	1	60	60	9	2	2	11	0	0	4	1	1	2	4	2	2	2.28571	3	5	5	26	0	2	18	1	3	1	0	2	0	1	6	3.5	6	6	6	6	6	6	6	4	4	4			1
Male	396	1	45	45	6	2	2	8	0	0	4	3	3	3	4	3	2	3.14286	5	5	4	18	0	1	21	4	3	4	1	7	0	0										4	3.33333	4			1
Male	398	1	72.5	72.5		2	2		0	0	5	4	3	5	5	5	3	4.28571	3	5	4	13	0	2	18	1	2	1	0	2	2	3										5	4.5	5			1
Female	399	1	50	61	6	3	2	9	0	0	4	2	2	3	3	3	4	3	4	4	4	18	0	1	19	2	3	2	2	6	0	2	5	3.75	5	3.16667	3.25	5.16667	4.77778	4.875	4.71429	3.69231	2.33333	4	2	29.6667	0
Female	402	1	50	61	9	3	0	12	0	0	5	3	3	4	4	5	4	4	1	4	4	8	0	1	19	1	1	1	1	3	0	0	6.33333	3.25	5.33333	5.16667	5.25	7	5.11111	5	6.85714	3.76923	1.66667	4.83333			0
Male	403	1	63	63	7	2	0	9	0	0	4	3	2	4	4	3	3	3.28571	2	2	2	2.5	0	1	22	3	2	3	2	5	0	0	4.16667	2.5	2.33333	4.16667	3.75	3.83333	6.22222	5.125	5.57143	4.07692	3.66667	3.16667	3	61.8619	1
Male	404	1	55	55	7	1	5	8	0	0	4	2	2	5	5	5	4	3.85714	5	4	3	8	0	1	20	3	3	3	0	6	0	0	1.66667	1.5	5.33333	4	5.75	6	2	4.625	3.28571	4.84615	4.66667	3.5			1
Female	405	1	40	48.8	6	0	0	6	0	0	4	2	1	2	3	3	4	2.71429	1	4	5	13	0	1	20	3	3	3	2	8	0	1	6.66667	4.25	4	2.5	1.5	4.66667	5.66667	4.5	4.57143	2.30769	1.83333	4	2	36.6667	0
Female	406	1	40	48.8	8	5	8	13	0	0	3	1	1	2	3	4	3	2.42857	5	5	5	13	0	1	21	4	2	1	0	3	3	1	5.16667	3	5.66667	4.5	3.75	5.5	4.55556	5.625	4.85714	4.07692	3	4.5			0
Male	407	1	80	80	7	1	0	8	1	0	5	4	4	5	5	4	4	4.42857	1	4	4	18	0	1	21	3	3	3	3	9	0	3	5.83333	3.25	5.5	5.66667	6.5	6.16667	3.66667	5.375	4.71429	4.69231	4.66667	3.83333			1
Male	409	1	80	80	11	0	0	11	1	0	5	2	2	4	5	4	4	3.71429	2	5	5	26	0	2	20	2	3	2	1	5	0	2	6.16667	1.75	6.66667	5.66667	6.25	7	6.33333	6.75	6.85714	5	4.33333	5	3	55.5556	1
Female	410	1	38	46.36	6	0	2	6	0	0	4	4	5	5	5	4	4	4.42857	4	4	5	18	0	1	23	5	1	4	3	11	3	1	3.16667	1.75	5.16667	3.33333	5	5.83333	3.66667	5.875	2	4.23077	3.33333	4.33333			0
Male	412	1	55	55	5	2	8	7	0	0	3	2	5	4	4	5	4	3.85714	5	5	5	18	0	1	20	2	1	1	1	3	0	0															1
Male	414	1	70	70	10	1	2	11	1	0	5	5	5	5	4	2	5	4.42857	1	2	1	2.5	0	1	21	6	1	1	0	2	3	3	2.33333	1.25	1.66667	4.16667	6.25	6.5	2.44444	5.125	3.57143	5	4	4.16667			1
Male	415	1	80	80	12	0	2	12	1	1	4	4	3	3	4	3	4	3.57143	4	4	3	13	0	2	20	3	3	3	2	8	0	1	1.66667	1.25	2.83333	3.16667	4	5	2.44444	4.375	3.14286	4.07692	2.33333	3.5	4	91.5916	1
Male	416	1	55	55	7	3	0	10	0	0	5	4	5	5	5	4	5	4.71429	2	5	4	8	0	3	20	1	1	0	0	1	0	1	5.16667	1.5	4	1.5	5.25	5.83333	4.88889	3	2	4.61538	4.5	4.33333			1
Male	417	1	65	65	6	1.5	2	7.5	0	0	2	2	3	3	3	3	3	2.71429	1	5	5	13	0	2	18	1	1	1	0	2	2	2	4.16667	1.75	2.66667	3.83333	6.75	6.33333	3.77778	4.625	4.14286	5	5	4.83333			1
Female	418	1	40	48.8	7	1	2	8	0	0	2	1	1	1		1	3		5	5	5	26	0	1	19	2	3	1	1	3	0	1	3.66667	3.25	5	3.33333	2	5.16667	4.55556	4.75	4.71429	2.30769	2	4			0
Male	421	1	70	70	7	0	2	7	0	0	4	2	3	4	5	5	5	4	2	5	5	13	0	2	20	2	3	2	2	6	0	0	4.33333	2.5	3.66667	4.33333	6.75	7	3.88889	5.375	4	4.46154	2.66667	4.5			1
Female	424	1	60	73.2	6	0	0	6	1	0	4	2	2	3	4	3	4	3.14286	2	5	5	18	0	1	18	1	3	1	0	1	0	1	5.83333	3.75	4.66667	4.66667	6.25	5.33333	5	4.875	4.42857	4	3.66667	4			0
Female	426	1	50	61	7	1	0	8	0	0	5	2	1	2	4	2	3	2.71429	2	5	5	18	0	2	19	1	3	1	0	2	0	1	5.33333	3.5	5.5	4.16667	3.75	5.83333	5.11111	5	4.57143	3.76923	2.33333	4.33333	1	23.6667	0
Male	427	1	80	80	9	0	2	9	0	0	4	1	1	2	2	2	2	2	3	5	5	13	0	1	20	2	1	2	1	5	0	1	3.5	3.5	3.5	3.83333	3.5	3.33333	3.44444	2.875	2	3.69231	3.66667	4.16667	3	61.2613	1
Female	428	1	55	67.1	7	1	5	8	0	0	3	1	1	1	2	3	3	2	5	5	5	23	0	2	21	4	3	4	4	12	0	0	3.83333	1.75	6.66667	5.16667	4.25	5.5	4.88889	6.25	4.42857	3.69231	1.83333	4.16667	3	55.3333	0
Male	429	1	70	70		0	2		0	0	5	5	5	5	5	4	4	4.71429	1	5	4	13	0	2	22	4	3	4	4	12	0	2	3.16667	3.25	4.66667	3.5	4.25	6.16667	2.22222	4.125	3.71429	3.84615	3	4			1
Male	430	1	75	75	10	0	0	10	0	0	4	1	1	1	4	4	4	2.71429	2	4	4	8	0	2	19	1	3	1	0	2	0	1	4.33333	2.25	5.33333	5.16667	6.5	6.66667	4.88889	5.75	5.28571	3.76923	5	4.33333			1
Female	434	1	70	85.4	10	0	0	10	0	0	4	2	4	3	4	3	3	3.28571	2	4	2	26	0	1	20	3	3	3	2	8	0	0	3.5	2.75	4.5	4.33333	6.75	7	5.55556	5.25	5.42857	4.23077	4.5	4.16667	3	60.6667	0
Male	435	1	77	77	9	0	0	9	0	0	5	4	4	4	4	2	4	3.85714	1	5	5	18	0	1	19	1	3	1	0	2	0	2	4.16667	3.75	4.16667	4.5	4.75	6.83333	5.55556	5.875	6.28571	3.92308	4	4.5	2	42.042	1
Male	436	1	65	65	9	0	0	9	0	0	5	1	1	3	3	4	4	3	2	5	5	18	0	1	18	1	3	1	0	2	0	1										4.61538	3.66667	4.16667			1
Male	437	1	50	50	7	5.5	5	12.5	0	0	2	2	2	4	4	4	5	3.28571	4	5	4	18	0	2	21	3	1	2	3	8	0	2	4.33333	5	4.33333	4.83333	3.75	5.33333	3.11111	5.625	3.71429	3.53846	3.83333	4.66667			1
Male	439	1	55	55	8	0.25	2	8.25	1	0	3	1	1	2	2	1	2	1.71429	3	4	4	18	0	1	20	2	3	2	1	5	0	2	3.5	3	4.5	2.66667	4.5	4.66667	3.88889	3.125	2.14286	3.61538	3.16667	2.83333	1	15.3153	1
Male	440	1	75	75	7	0	0	7	1	0	5	2	4	5	5	4	5	4.28571	1	5	5	18	0	1	20	2	3	2	2	6	0	1	2.33333	1.25	1	1.5	3.75	5.33333	1.77778	1.875	1.28571	4.69231	4.33333	4.33333			1
Male	442	2	75	75		3	2		0	0	4	4	4	4	4	3	3	3.71429	3	3	1	8	0	2	19	1	1	1	0	1	2	3	2.5	1.75	2.5	5.83333	6	6	1.77778	3.375	2.57143	4.53846	3.33333	4.5			1
Female	445	1	60	73.2	7	0	5	7	0	0	4	1	1	3	3	4	4	2.85714	5	5	5	18	0	1	19	2	3	2	0	3	1	1	5	5.5	4.33333	5	5.25	5.83333	3.44444	4.625	3	3.23077	3.16667	3.33333	2	35.6667	0
Male	446	1	90	90			0		1	0	5	5	4	5	5	5	3	4.57143	2	4	4	8	0	2	22	4	1		2	5	2	3													4	96.3964	1
Male	447	1	60	60	12	0	5	12	0	0	2	4	4	5	4	2	1	3.14286	3	4	2	2.5	0	1	19	2	1	0	1	2	2	2	4.33333	1	1.5	3.83333	4.25	5.66667	2.55556	5	3.57143	4.23077	4	4.83333			1
Male	448	1	70	70	9	1	0	10	0	0	4	4	4	5	5	3	4	4.14286	1	5	4	13	0	1	19	2	1	2	2	6	2	3	5.5	3.5	4.33333	4	6.75	7	3	4.75	4.42857	4.53846	3.16667	4	4	75.976	1
Male	450	1	67	67	9	10	2	19	0	0	3	2	2	5	4	4	2	3.14286	4	3	3	2.5	0	2	20	2	3	2	1	4	0	1	2.16667	1.5	3.66667	2	3.5	4.66667	2.22222	2.625	3	3.30769	3.66667	3.5	1	9.60961	1
Female	451	1	45	54.9	7	1	5	8	0	0	4	1	1	1	4	2	2	2.14286	5	5	5	23	0	2	20	3	3	1	2	5	0	2	5.33333	4.5	5.16667	3.66667	4	5.66667	5	5.875	5.28571	3.23077	3	4.16667	1	20	0
Male	452	1	80	80		0	2		0	0	4	2	3	5	5	4	4	3.85714	4	5	5	18	0	1	21		1	3	1	5	0	0	3.83333	2	3.83333	2.5	6.25	6.83333	4.33333	5.25	4.28571	3.76923	3.33333	4.66667	3	59.7598	1
Female	453	1	50	61	6	1	2	7	0	0	4	4	5	4	4	1	5	3.85714	1	5	5	23	0	2	20	2	3	2	1	4	0	3	4.16667	2.75	3.83333	3	6.5	7	4.77778	5.125	4	4.53846	4.5	4.83333	2	45.3333	0
Male	454	1	75	75	9	1	0	10	0	0	5	4	4	5	5	4	5	4.57143	2	3	2	2.5	0	2	21	3	3	1	1	3	0	1	6.5	4.75	5.83333	3.66667	5.75	7	5.55556	5.75	5.14286	4.76923	2.83333	4.16667	2	25.8258	1
Female	456	1	37.5	45.75	6	0	0	6	0	0	3	2	2	4	4	3	2	2.85714	2	4	4	8	0	1	22	4	1	4	4	12	2	2	1.83333	1	1.83333	1	4.25	6	1.22222	2.125	1.71429	3.53846	3.16667	4	3	62.3333	0
Female	457	1	50	61		1	2		0	0	2	2	2	4	4	2	5	3	4	5	5	26	0	2	19	2	1	2	2	6	0	1	2.16667	1	5	1	5	7	5.22222	3.375	7	4.76923	2.83333	5			0
Male	458	1	50	50	6	1	0	7	0	0	3	1	1	5	3	4	2	2.71429	2	4	4	18	0	1	19	1	3	1	1	3	0	0	3	1.5	6.16667	4	6	6.16667	3.77778	4.375	4.28571	5	5	5			1
Male	460	1	100	100	12	0	5	12	0	0	3	2	4	3	4	2	2	2.85714	3	5	5	26	0	2	20	3	3	2	2	6	1	2													3	60.0601	1
Female	461	1	25	30.5	3.5	6	2	9.5	0	0	4	1	1	2	3	5	4	2.85714	5	5	5	18	0	1	18	1	3	1	0	2	0	1	5.16667	2.5	4.33333	3.66667	3.25	5.33333	4.66667	3.875	4.42857	4.46154	3.33333	4.83333			0
Male	462	1	100	100	10	0	2	10	0	0	4	2	2	5	3	5	3	3.42857	4	5	5	8	0	1	22	4	1	4	3	11	0	1	6.33333	2.25	5	1.83333	6.5	7	4.77778	6	6	4.38462	4.33333	4.33333	3	68.7688	1
Male	463	1	80	80	13	0	2	13	0	0	4	1	1	5	3	5	4	3.28571	3	3	2	8	0	1	21	6	1	4	4	9	2	1													3	56.7568	1
Male	464	1	65	65	9	1	2	10	0	0	3	3	4	3	4	3	4	3.42857	4	5	4	18	0	2	19	2	1	1	0	1	2	2	5	3.5	4.16667	5.33333	6	6.83333	2.66667	4.375	3.71429	4.84615	4.16667	4.83333			1
Female	465	1			9	2	5	11	0	0	2	1	1	3	2	4	2	2.14286	4	5	5	13	0	1	21	4	3	4	4	11	0	3	4.83333	6.75	5.83333	4.83333	6.25	6.16667	4.88889	5.375	4.85714	4.23077	3.5	4.16667			0
Male	466	1	68	68	10	1	5	11	0	0	4	1	1	3	4	5	3	3	5	5	5	18	0	1	22	4	3	3	3	9	0	2	5.83333	1.25	5	2.66667	5.5	6.33333	4.55556	5.25	3.28571	4.92308	3.66667	5			1
Female	467	1	48	58.56	7	5	5	12	0	0	4	3	3	4	4	2	4	3.42857	5	5	5	8	0	1	19	2	1	2	1	4	0	1	4.33333	4.25	4.16667	3.33333	6.75	6.5	3.55556	4.875	3.71429	3.92308	3.5	4.16667	3	51.3333	0
Female	468	1	55	67.1	7	0	0	7	0	0	3	1	1	1	2	1	2	1.57143	1	5	5	26	0	1	21	4	3	4	3	10	0	2	4.33333	3.25	6.16667	4.83333	3.75	6.66667	4.33333	5.75	6.14286	4.46154	4	4.83333			0
Male	469	1	55	55	6	0	0	6	0	0	3	2	2	4	4	3	2	2.85714	2	5	5	18	0	1	19	1	3	1	0	2	0	2	3.83333	4	4.83333	5.33333	5.25	5.33333	3.44444	5.375	4	4.92308	4.33333	4.83333			1
Female	470	1	40	48.8	7	2	2	9	0	0	4	1	1	2	2	2	3	2.14286	4	5	5	2.5	0	1	21	3	3	3	2	8	0	2	5	3.25	5.33333	3.33333	3	4	4.44444	4.5	4.28571	3.61538	2.5	4			0
Male	471	1	75	75	7	0	0	7	1	0	3	1	1	4	4	4	3	2.85714	4	5	5	23	0	2	19	2	3	2	2	6	0	1	3.66667	1.25	3.16667	2.83333	4	4.83333	2	2.375	3.14286	4.23077	3.16667	4.66667	3	52.8529	1
Male	472	1	50	50	6	3	2	9	1	0	5	5	5	5	5	4	5	4.85714	4	5	5	18		1	18	1	3	1	0	2	0	3										4.61538	3.5	5	1	10.8108	1
Female	473	1	30	36.6	6	3	0	9	0	0	4	1	1	3	2	4	2	2.42857	1	5	5	23	0	2	22	4	3	4	4	12	0	0	4.16667	1	3.83333	2.5	3	4.83333	3.77778	2.875	3.14286	3.15385	3	3.83333	2	31.6667	0
Male	475	1	70	70	7	1	2	8	0	0	3	2	2	3	3	4	3	2.85714	3	4	4	2.5	0	2	19	2	1	2	2	6	0	0	5.16667	4.25	5.33333	5.33333	4.75	5.66667	5.22222	5.5	5.14286	3.84615	2.83333	3.83333	1	23.1231	1
Female	476	1	50	61	6	1	2	7	1	0	2	1	1	2	4	1	2	1.85714	2	5	5	8	0	1	20	2	1	2	1	5	2	1	5.5	2.75	3.16667	5.33333	5.75	6.16667	3.22222	5.75	3.42857				3	50	0
Male	478	1	110	110	10	3	2	13	1	1	5	4	4	4	4	4	5	4.28571	2	4	4	8	0	2	23	5	1	4	3	11	3	0	4.16667	5.5	1.33333	1.16667	2.25	5.16667	2.22222	1.625	1.57143	4.07692	3.5	4.16667	4	99.3994	1
Female	479	1	35	42.7	7	0	2	7	0	0	4	1	1	4	4	5	4	3.28571	4	5	5	8	0	2	20	3	3	2	2	6	0	2	5.16667	3.75	4	3	3.25	4.66667	4.11111	4.125	3.42857	4.30769	2.83333	5			0
Female	480	1	55	67.1	6	1	2	7	0	0	4	1	1	4	2	2	3	2.42857	3	5	5	8	0	2	21	4	3	4	2	10	0	1	3.66667	4.25	3.5	3	5.75	6.33333	3.77778	4.875	3.42857	4	3.66667	4.16667			0
Male	481	1	55	55	7	0	2	7	0	0	5	2	3	4	5	4	4	3.85714	2	5	5	23	0	1	19	1	3	1	1	2	0	0	5.5	3.75	5.83333	3.83333	6.25	6.83333	4.55556	4.875	3.14286	4.76923	3.16667	5			1
Male	482	1	80	80	11	0	2	11	0	0	3	4	3	4	4	2	2	3.14286	2	3	3	2.5	0	2	20	2	1	2	2	5	1	3	3.5	2.5	3	4.16667	5.5	5.66667	2.88889	5.5	4.71429	4.07692	3.83333	4	4	82.5826	1
Female	483	1	50	61	12	14	2	26	0	0	3	1	1	1	2	2	2	1.71429	2	5	5	13	0	1	19	1	2	1	1	3	2	2	3.16667	1.25	4.83333	3.33333	4.75	5.66667	1.77778	3.625	2	3.92308	2.66667	3.33333	1	1	0
Male	484	1	65	65	10	0	2	10	0	0	4	1	2	4	4	4	4	3.28571	4	5	5	18	0	1	20	3	3	3	2	8	0	1	4.5	1.75	2.33333	3.16667	4.5	5.83333	6	3.125	3.71429	3.46154	3	4	1	20.1201	1
Female	485	1	50	61	6	1	2	7	0	0	3	1	1	1	4	3	2	2.14286	5	5	5	18	0	2	19	1	1	1	0	1	0	2	4.66667	2.75	4.33333	3.33333	4.5	6.66667	4.66667	3.125	4.14286	3.76923	3.16667	4.5			0
Female	486	1	45	54.9	7	1	0	8	0	0	3	2	2	3	3	3	4	2.85714	1	5	5	8	0	2	19	1	3	1	1	3	0	2	7	6.25	6.33333	5.33333	4.25	7	3.88889	3.375	1.71429	4.23077	3	5			0
Female	487	1	48	58.56	6	4	2	10	0	0	3	1	1	1	2	2	1	1.57143	4	5	5	18	0	1	21	4	3	4	3	10	0	1	2.5	3	2.66667	2	2	3	2.22222	2.75	2.57143	3.30769	1.66667	4	2	43	0
Female	488	1	50	61		2.5	2		0	0	4	1	2	2	2	2	1	2	3	5	5	2.5	0	3	19	1	2	1	1	3	2	2	5.16667	5.5	3.66667	5.66667	3.5	5.66667	3.77778	4.625	3.85714	3	1.83333	4.16667			0
Male	489	1	80	80	10	17	2	27	0	0	4	1	1	2	3	5	5	3	5	2	1	8	0	1	19	2	1	2	0	3	2	1	6.83333	4.5	2.5	1.66667	6.75	7	2.77778	6.75	4.28571	4.69231	5	5			1
Female	490	1	45	54.9	7	0	0	7	0	0	5	1	1	4	2	5	5	3.28571	4	5	5	26	0	1	21	3	3	3	2	8	0	0	2.83333	2.5	5.33333	1	2.75	5.66667	5.33333	2.875	2.57143	3.46154	2.33333	4.5			0
Male	491	1	85	85		0	0		0	0	3	2	2	4	5	2	4	3.14286	1	4	4	2.5	0	1	19	1	3	1	0	2	0	2	3.83333	1	2.5	2.16667	5	6.5	1.11111	3.375	1.71429	4	3	4			1
Female	493	1	67	81.74	3	0	2	3	1	1	5	5	5	5	5	4	4	4.71429	1	4	5	23	0	1	22	6	1	2	2	6	3	3	3.16667	1.75	3.16667	3.33333	5.75	6.83333	1.88889	4.375	2.14286	4.69231	3.66667	4.66667			0
Male	495	1	65	65	10	0	0	10	0	0	3	1	1	1	3	4	4	2.42857	3	5	5	18	0	1	20	2	3	2	1	5	0	0	1	1	3.83333	2.33333	4	6.5	2.66667	3.75	1	3.53846	2.5	4.66667			1
Female	496	1	67	81.74	7	1	2	8	0	0	5	3	2	2	4	4	4	3.42857	5	5	5	8	0	2	19	2	1	2	2	6	2	2	5.5	3.75	3.66667	5.66667	6.25	7	2.55556	5.5	3.42857	4.07692	2.5	3.83333	4	77.6667	0
Female	497	1	35	42.7	7	0	8	7	1	0	4	4	4	4	4	4	5	4.14286	3	5	3	13	0	1	19	2	1	0	1	2	1	2	3	2	2.83333	2	3.75	5	1.33333	3.875	2.85714	4	4	4			0
Male	498	1	75	75	8	0	2	8	0	0	5	5	5	5	5	2	3	4.28571	2	5	5	18	0	2	19	1	1	1	0	2	0	3	2.83333	1.25	3.83333	5.16667	5.75	6.66667	6.11111	4.75	3.85714	5	5	5	4	85.5856	1
Female	499	1	65	79.3	7	0	0	7	0	0	5	5	5	5	5	4	5	4.85714	2	4	4	2.5	0	1	19	1	1	1	0	2	2	3	7	3.5	6.66667	5.66667	6.75	7	5.11111	6.75	7	5	4.66667	5	4	91.6667	0
Female	500	1			7	1	0	8	0	0	5	2	1	1	1	5	3	2.57143	2	4	5	18	0	1	19	1	3	1	0	1	0	1	4.5	2.25	4.66667	3.16667	2.75	5.66667	5.22222	5.625	4.57143	4	3.83333	4.16667			0
Female	501	1			8	1	2	9	0	0	4	1	1	1	2	3	3	2.14286	2	4	4	8	0	1	19	3	3	2	3	8	0	0	4.83333	2.75	4.83333	2.16667	3.25	5	2	3.125	3	3.23077	2.33333	3.66667			0
Male	502	1	70	70	6	2	2	8	0	0	4	3	3	4	5	3	4	3.71429	4	5	5	13	0	1	18	1	1	1	0	2	0	2	7	3.25	7	6.66667	6.75	7	6.33333	7	6.14286	5	4.66667	5			1
Female	503	2	65	79.3		2	5		0	0	3	1	1	1	1	1	3	1.57143	4	4	3	13	0	1	22	4	1	2	2	4	0	0	3.66667	2.5	4.16667	1.66667	2.5	4.33333	3.22222	2.75	3.28571	3.92308	3.33333	4.16667	3	50.3333	0
Male	505	1	75	75	7	0	0	7	0	0	4	2	1	4	3	2	3	2.71429	1	4	4	18	0	1	21	4	3	4	4	12	0	0										4	3.66667	4.33333			1
Male	506	1	50	50	6	2	5	8	0	0	4	1	1	4	2	5	4	3	5	5	5	23	0	1	20	2	3	2	0	3	0	1	5.66667	3.5	6	1	6.75	7	6.33333	5.625	6.14286	5	4.16667	5			1
Male	508	1	50	50	12	3.5	5	15.5	0	0	5	3	5	5	5	5	4	4.57143	4	4	1	18	0	1	22	4	1	4	3	10	0	2										4.76923	4.5	4.83333			1
Male	509	1	75	75	7	7	2	14	0	0	5	2	1	4	5	4	4	3.57143	4	5	4	18	0	2	22	4	3	4	4	11	0	2	3.33333	3	3.83333	3.66667	5.5	6.16667	3.55556	3.875	3.71429	4.15385	3.33333	4.66667	3	50.4505	1
Female	510	1	50	61	7	2	5	9	0	0	3	1	1	3	3	2	2	2.14286	5	4	4	8	0	2	21	4	3	3	1	5	2	1	4.33333	5.25	4.5	4.33333	4.75	4.66667	3.77778	4.75	4	3.92308	3.83333	4	2	37	0
Male	512	1	85	85	10	1.5	0	11.5	0	0	3	3	4	5	4	4	2	3.57143	2	5	4	26	0	3	21	4	1	3	3	9	0	1										4.92308	4.83333	5			1
Female	513	1	60	73.2	7	7	10	14	0	0	3	1	1	1	1	1	3	1.57143	5	5	4	23	0	1	20	2	1	1	0	2	3	3	4.33333	6.5	7	2.66667	7	7	3.55556	5.875	3.28571	4.23077	4.33333	4.66667	4	80	0
Male	514	1	85	85	10	0	2	10	0	0	4	1	2	5	5	5	4	3.71429	1	5	5	18	0	1	20	2	1	1	2	3	0	1	4.33333	3	4.16667	4	7	7	3.11111	4.625	2.57143	4.46154	3.66667	5	2	39.6396	1
Male	515	1	85	85	10	0	0	10	0	0	2	1	1	1	2	2	1	1.42857	1	5	5	8	0	1	20	3	1	3	2	8	0	1	6	2.25	6.5	6	6.75	7	6	6.625	5.28571	5	4.5	5	2	37.2372	1
Female	517	1	75	91.5	11	0	2	11	0	0	2	2	2	3	3	2	2	2.28571	3	5	4	13	0	3	20	3	2	2	2	6	2	3										3.76923	3.83333	4			0
Male	519	1	70	70		2	2		0	0	4	3	2	5	4	3	1	3.14286	3	4	3	2.5	0	2	20	2	1	2	0	3	2	1										3.92308	4	3.66667			1
Male	520	1	75	75	8	5	0	13	0	0	3	2	3	4	4	3	3	3.14286	2	5	5	13	0	1	19	1	1	1	1	3	2	1	6	5.5	6.16667	4.5	6.25	6.5	5.33333	4.875	4.57143	4.23077	3.5	4.33333	1	9.00901	1
Female	521	1	60	73.2		1	2		0	0	4	1	1	4	3	3	4	2.85714	4	5	5	18	0	2	19	2	3	2	2	6	0	2	4.83333	2.75	3.83333	3.83333	5.5	6.33333	4.22222	5	5.28571	3.92308	2.66667	4	2	30.6667	0
Male	522	1	45	45	6	1	0	7	0	0	4	2	2	3	3	2	4	2.85714	1	5	5	23	0	2	19	1	3	1	1	3	0	1	4.83333	1.5	5	3.33333	4.75	6.5	1.88889	2.375	2.14286	4	2.33333	4.83333	1	11.7117	1
Male	526	1	50	50	10	0	0	10	0	0	1	1	4	2	4	3	1	2.28571	2	4	5	18	0	1	18	1	1	0	1	2	0	1	4.5	3.75	2.83333	2.5	5.25	5.33333	3.44444	3.75	3.57143						1
Female	527	1	55	67.1	10	1	2	11	0	0	4	1	1	2	4	4	4	2.85714	2	4	5	13	0	1	20	3	3	2	2	6	0	1															0
Female	528	1	50	61	6	3	0	9	0	0	4	3	3	4	4	4	2	3.42857	2	4	4	8	0	1	18	1	1	1	1	3	0	1	5	4.5	4.5	5	5.5	6.5	4.33333	5.125	4.28571	4	4	4			0
Female	529	1	50	61	6.5	2	2	8.5	0	0	4	1	1	1	4	5	2	2.57143	3	4	4	18	0	1	21	4	1	3	2	8	1	0	5	5.75	5.66667	4	2.25	3.83333	6.33333	5.875	6.85714	3.69231	1.33333	4.33333	3	64.3333	0
Female	530	1	55	67.1	7	1	0	8	0	0	4	1	1	5	5	5	5	3.71429	3	3	4	26	0	1	21	3	3	3	2	8	0	1	6	4.75	3.83333	4	7	7	4.77778	4.5	4	4.69231	3.5	5	3	61.3333	0
Male	531	1	55	55	6	0	0	6	0	0	3	1	1	2	4	3	3	2.42857	3	5	5	18	0	1	19	1	3	1	1	3	0	1	3.33333	1.75	3.16667	2.66667	5	5.33333	3.22222	4	2.85714	3.53846	3.16667	4.66667			1
Male	532	1	50	50	7	2	2	9	0	0	3	3	4	5	5	4	3	3.85714	1	4	3	8	0	1	19	1	3	1	0	2	0	1	6.16667	3.5	6	6.5	6.75	7	4.11111	6.5	5.14286	4.69231	4	5			1
Female	533	1	50	61	8	0	0	8	0	0	5	1	1	2	3	2	2	2.28571	1	5	5	8		2	22	4	2	2	2	6	0	0	4.83333	4.5	4.83333	3	3.75	5.5	2.66667	4.125	2.85714	4.23077	2.83333	4.33333	2	41.6667	0
Male	534	1	75	75	12	0	2	12	0	0	3	1	2	2	3	2	3	2.28571	5	4	5	26	0	1	19	1	1	1	0	2	1	3	3.5	1.75	3.33333	2.66667	4	5.66667	3.55556	2.875	2.42857	3.61538	3.33333	4.33333			1
Female	535	1	35	42.7	6	1	2	7	0	0	5	1	2	4	5	4	4	3.57143	2	4	4	8	0	2	20	2	2	2	1	5	0	0	5	2.5	4.83333	3.66667	2.75	6.83333	4.44444	5.375	5.28571	3.84615	2.16667	5	2	28	0
Female	536	1	50	61	6	3	0	9	1	0	4	1	1	1	2	1	2	1.71429	1	5	5	8	0	1	19	2	3	2	2	6	0	3	7	2.5	7	7	3.25	4.33333	7	6.875	7	3.53846	3.33333	5			0
Female	537	1	45	54.9	6	0	2	6	0	0	5	2	2	2	4	3	3	3	4	5	5	23	0	1	18	1	3	1	0	2	0	1	5.66667	3.5	5.5	5.16667	5.75	7	5.66667	6.5	5.42857	4.46154	3.16667	4.83333			0
Male	538	1	65	65	7	3	0	10	0	0	3	2	4	3	4	5	3	3.42857	3	5	5	26	0	2	19	2	3	2	1	5	0	1										4.46154	3.66667	4.5			1
Female	539	1	55	67.1	11	3	5	14	0	0	3	2	3	3	2	4	3	2.85714	5	4	4	18	0	1	18	1	1	1	1	3	0	2	3.5	3.25	2.16667	3.33333	5	4.83333	4.22222	3.125	2.85714	4	3.33333	3.5			0
Female	540	1	45	54.9	1	1	2	2	0	0	2	1	1	1	2	2	2	1.57143	5	5	4	8	0	2	22	4	3	4	3	11	0	1	5.83333	5.5	6	5.5	6	6	5	6	5.14286	4.07692	3.33333	4.66667	2	32	0
Male	541	1	100	100	9	0	5	9	0	0	5	3	4	4	3	3	2	3.42857	4	2	2	2.5	0	4	20	3	1	3	2	8	3	2										4.92308	5	5	4	77.1772	1
Female	543	1	55	67.1	10	5	0	15	0	0	3	1	3	5	5	4	2	3.28571	2	5	5	26	0	1	18	1	1	1	0	1	0	0	2.16667	2.25	1.83333	1.5	2.25	6.33333	2.77778	3.75	1.57143	4.30769	3.5	5	1	15.3333	0
Female	544	1	45	54.9	8	0	2	8	0	0	2	1	1	2	3	3	2	2	3	4	5	13	0	1	19	2	3	2	1	5	0	2	5.5	5.25	6	4.66667	4.75	5.5	5.33333	5.875	5.14286	3.92308	4	4			0
Male	548	1	90	90	11	1	2	12	0	0	4	1	1	4	4	2	3	2.71429	4	5	5	13	0	1	20	3	3	3	2	8	0	0										2.84615	2	3.66667	1	21.9219	1
Male	549	1	64	64	8	0	2	8	0	0	4	1	1	2	4	3	4	2.71429	2	5	5	13	0	1	19	1	3	1	0	2	0	1	3.5	1.5	3.16667	2.5	3.5	5.5	1.33333	4.5	2.14286	3.76923	2.66667	4			1
Male	551	1	70	70	9	0	2	9	0	0	4	3	4	5	4	1	2	3.28571	1	5	5	13	0	2	19	2	1	2	1	5	1	1	3.5	1.75	3.5	3.16667	5	5.5	3	3.125	1.14286	4.30769	3.66667	4			1
Female	553	1	70	85.4	10	0	2	10	0	0	4	2	4	2	2	4	4	3.14286	3	4	2	8	0	1	22	4	1	4	2	9	2	2	3.66667	3.75	4.16667	5.5	6.25	7	2.88889	5.125	4.42857	4.69231	3.83333	3.5	4	92.6667	0
Male	554	1	70	70	7	0	0	7	0	0	5	3	3	4	4	4	4	3.85714	2	5	5	8	0	1	18	1	1	1	0	2	0	1										3.53846	2.33333	3.66667	1	15.6156	1
Male	555	1	65	65	8	3	2	11	0	0	4	3	2	3	3	3	2	2.85714	5	3	3	8	0	1	19	1	3	1	0	2	0	2	3.16667	2.25	3.16667	3	6.25	5.83333	5.44444	4.875	3.57143	3.84615	3.33333	4	1	19.2192	1
Male	556	1	70	70	7	0	0	7	0	0	3	1	1	2	2	4	2	2.14286	1	5	5	23	0	1	19	2	3	2	1	5	0	1	4.33333	1.75	5.66667	1.5	4	6	5	4.625	2.14286	3.61538	3.16667	3.33333			1
Male	557	1	90	90	9	3	2	12	0	0	3	2	1	5	4	4	5	3.42857	2	4	4	8	0	1	22	4	1	4	4	11	0	3	2.5	4.75	5.66667	5.16667	6	6.66667	3.33333	4.5	2.14286	4.30769	3.5	4.5	4	83.7838	1
Male	558	1	70	70	7	0	2	7	0	0	4	1	1	3	4	3	3	2.71429	2	5	5	13	0	2	20	2	3	2	1	5	0	1	3.5	3.5	4	3.16667	3.75	5.5	3.55556	4.375	4.14286	4.07692	2.5	4.16667			1
Female	560	1	60	73.2	6	0	10	6	0	0	5	2	2	5	2	4	2	3.14286	5	5	5	13	0	2	20	3	1	1	0	2	2	2	7	6.5	4.33333	4.5	5.75	6.83333	3.66667	6.5	5.14286	4.92308	4.66667	5			0
Male	562	1	60	60	8	2	2	10	0	0	4	5	5	5	5	5	4	4.71429	1	4	4	8	0	1	20	2	1	2	2	6	2	3	1.16667	1.5	1	3.16667	5.25	5.83333	1.11111	2	1	5	4.83333	4.83333	4	89.1892	1
Male	563	1	45	45	8	4	2	12	0	0	4	2	2	3	3	5	3	3.14286	3	5	5	26	0	1	19	2	2	1	0	1	0	1	4.33333	4.75	2.16667	5.33333	3.5	6.5	5.11111	6	3.71429	3.53846	3	4.5	2	44.4444	1
Female	564	1	45	54.9	7	2	0	9	0	0	3	3	3	3	4	4	3	3.28571	4	5	5	13	0	1	19	1	1	1	0	1	2	3	7	5.5	7	7	7	7	6.33333	6.875	7	4.92308	4.83333	5	3	70.3333	0
Male	565	1	75	75	11	1	8	12	0	1	3	2	2	4	3	4	2	2.85714	5	5	5	18	0	1	21	4	3	4	3	11	0	2	2.33333	2	3.66667	4.5	6.5	6.83333	4.22222	5.625	4	4.61538	4.83333	5	4	90.6907	1
Female	566	1	60	73.2	7	7	5	14	0	0	3	2	2	2	2	2	2	2.14286	4	5	5	23	0	2	22	6	2	3	4	11	2	0	5.5	4.75	2.16667	3.66667	3.25	4.16667	4.77778	4.875	3.28571	3.76923	3.5	4			0
Male	567	1	100	100	11	0	8	11	1	0	5	2	4	4	4	4	4	3.85714	5	5	5	13	0	2	22	3	1	3	1	6	3	1										4.69231	4.5	4.33333	4	89.4895	1
Female	568	1	50	61	9	0	0	9	1	0	4	3	2	5	5	3	5	3.85714	1	5	5	26	0	1	18	1	3	1	1	3	0	3										4.92308	4.33333	4.66667	2	44.3333	0
Male	569	1	50	50	7	2	0	9	0	0	5	1	1	3	4	4	5	3.28571	1	4	4	18	0	1	21	4	1	1	3	7	0	1	5.83333	4.25	5.5	2	4	6.5	4.88889	5.5	5.14286	3.84615	2.33333	4.83333			1
Female	570	1	49	59.78	10	2	0	12	0	0	4	2	2	2	3	2	4	2.71429	2	5	4	13	0	2	20	3	2	2	3	8	0	0	4.33333	2.25	5.33333	4.33333	3	3.66667	3.11111	3.5	3.42857	3.92308	3.66667	4	2	40.6667	0
Male	571	1	70	70	7	2	2	9	1	0	4	3	4	5	5	4	4	4.14286	3	4	3	8	0	1	19	1	1	1	0	2	2	1	6	3.5	4.83333	4.83333	7	6.83333	3.55556	5.5	3.85714				2	28.2282	1
Male	573	1	60	60	7	0	2	7	0	0	4	4	4	4	4	3	4	3.85714	3	4	4	8	0	2	18	1	3	1	0	1	0	0	4.16667	1.5	3.33333	2.66667	4.25	6.16667	2.66667	3.375	3	4.23077	3.33333	3.66667	1	6.90691	1
Female	574	1	60	73.2	7	2	0	9	0		5	2	2	2	5	4	5	3.57143	1	5	5	8	0	2	21	4	1	1	3	4	0	0	3.33333	5.5	6	4.16667	3.25	7	3.88889	5.5	5.85714	3.76923	3.33333	5			0
Male	575	1	60	60	9	3	2	12	0	0	4	1	1	4	2	2	3	2.42857	2	4	4	8	0	2	22	4	3	3	3	10	0	1	5.16667	4.5	5.16667	4.83333	5.75	6.83333	4.77778	5.75	4.57143	4.46154	3.66667	4.83333			1
Female	576	1	40	48.8	9	2	2	11	0	0	1	1	1	1	3	2	4	1.85714	4	5	5	26	0	2	22	4	1	4	3	10	0	1	6.33333	4.75	5.83333	3	2.25	6.5	5.55556	5.375	4.14286	3.61538	1.83333	4	2	32.3333	0
Male	577	1	75	75	10	0	0	10	0	0	5	3	4	5	5	3	5	4.28571	2	5	4	2.5	0	1	20	2	1	2	1	5	2	2	3.83333	2.5	1.66667	3	5	7	2.22222	4.875	3.42857	4.76923	3.33333	4.16667	4	87.0871	1
Male	578	1	77	77	10	2	0	12	0	0	4	1	1	1	1	2	3	1.85714	2	5	5	23	0	1	19	2	3	2	1	5	0	0	6.33333	4.5	6.16667	6.16667	6	6	5.77778	6.625	6.57143	3.84615	3.33333	3.66667			1
Female	579	1	50	61	7	9	0	16	0	0	1	1	1	3	2	3	3	2	1	5	5	23	0	1	19	1	1	1	0	1	0	2	5.16667	2.25	2.66667	3.66667	3.75	5.66667	3.55556	4.5	6.14286	3.92308	3	5	1	11.6667	0
Female	580	1	60	73.2	7	2	2	9	0	0	4	2	3	3	4	3	5	3.42857	5	5	5	18	0	1	20	2	1	1	1	3	0	2	4.5	4.5	3	4.5	5.5	6.33333	4.55556	6.375	4.71429	4.61538	3.66667	4.83333	2	45.6667	0
Female	581	1	100	122	7	3	2	10	0	0	5	2	3	4	4	5	5	4	4	5	3	8	0	1	22	4	3	3	4	9	0	1	2.33333	1.5	2.5	1.83333	3	4.16667	1.55556	3.375	1.42857	3.92308	3.33333	4	1	4	0
Male	582	1	80	80	8	3	2	11	1	1	5	1	4	4	5	5	4	4	3	5	5	26	0	1	20	3	3	2	2	7	0	2	4	2.75	5	3.5	4.25	6.33333	6.11111	5.625	5.28571	4.23077	3	4.5	3	64.2643	1
Female	583	1	55	67.1	8	4	2	12	0	0	4	4	5	5	5	5	4	4.57143	3	4	4	8	0	1	20	2	1	1	1	3	0	2	4.83333	6	5.33333	6.16667	6.5	6.5	6.11111	5.875	5.71429	4.15385	4.83333	4.5	3	52.3333	0
Female	586	1	55	67.1	7		2	7	0	0	3	2	2	2	3	2	4	2.57143	2	5	4	13	0	1	21	4	3	4	3	11	0	2	3.66667	1.25	5.33333	3.83333	3	5	1.55556	4.875	3.71429	3.84615	2.5	4.5			0
Male	587	1	80	80	10	1	2	11	0	0	5	4	4	3	5	4	5	4.28571	2	4	3	2.5	0	2	21	4	2	4	3	11	0	1	6	4	4.66667	3	6.75	7	5.55556	6	5.85714	4.61538	3.5	4.83333	2	47.4474	1
Female	588	1	57	69.54	9	0	2	9	0	0	4	1	1	5	4	1	5	3	4	5	5	26	0	1	18	1	1	1	0	2	0	1	5.83333	2.75	4.83333	5.16667	6.25	6.66667	5.33333	4.875	4.71429	4.84615	4.16667	3.83333			0
Female	591	1	60	73.2	7	2	5	9	0	0	5	2	3	5	5	5	4	4.14286	5	5	5	13	0	1	22	4	3	4	2	7	0	3	5.83333	5.75	5.16667	3.66667	5.5	6.66667	4.77778	4.875	4.57143	3.61538	3.33333	4.83333			0
Female	592	1	60	73.2	7		10	7	0	0	2	1	1	1	1	4	4	2	5	5	5	23	0	1	22	4	1	2	2	5	0	1	7	4	4.5	3.83333	5.25	6.83333	6.11111	4.625	4	4.61538	4	5	4	75.6667	0
Male	593	1	72	72	10	0	0	10	1	0	5	5	5	5	5	2	5	4.57143	1	5	5	26	0	2	22	3	1	3	3	9	3	3	3	1.5	2.5	1.66667	6.5	7	3.66667	5.75	6.71429	5	4.83333	4.66667	4	90.991	1
Female	594	1	40	48.8	6	3	2	9	0	0	4	4	4	5	5	3	4	4.14286	4	4	4	13	0	1	19	1	1	0	0	1	2	2	5	4	5	5.66667	6	6.66667	3	6	2.42857	4	3.16667	4.5			0
Male	596	1	55	55	7	1	10	8	0	0	5	3	4	5	5	5	5	4.57143	5	4	3	2.5	0	1	21	4	2	2	3	6	0	0	6.16667	5.25	4.5	4.33333	6.75	7	5.66667	6.125	3.42857	4.69231	4.16667	5	2	27.6276	1
Female	599	1	60	73.2	7	1	0	8	1	0	5	2	1	3	3	2	4	2.85714	1	5	5	13	0	1	19	2	2	2	2	6	2	1	6.33333	4	6.66667	2.5	3.75	5.83333	5.77778	5.75	5.57143	3.23077	1.83333	4.66667	3	65	0
Male	601	1	75	75	14	1	5	15	0	0	1	1	1	2	3	5	2	2.14286	4	5	5	8	0	2	21	3	2	3	2	6	2	1	4.16667	3.5	1	2.83333	5.25	6.16667	3.55556	3.875	3.28571	4.23077	3.5	3.83333	2	33.9339	1
Female	602	1	70	85.4	9	0	2	9	0	0	5	3	2	5	5	3	5	4	5	5	5	8	0	3	21	3	1	1	1	3	0	1	4.83333	5.75	5.16667	3.5	5.75	6.66667	3.22222	5.625	3.71429				3	63	0
Female	603	1	35	42.7	6	4	2	10	0	0	4	2	2	2	4	4	4	3.14286	4	5	5	23	0	2	21	3	3	2	0	2	0	0										3.61538	2.5	4			0
Male	604	1	75	75	3	1	2	4	0	0	4	4	4	4	4	2	4	3.71429	3	2	3	8	0	2	19	2	1	2	1	4	2	3	5.33333	5	5.16667	6.33333	6.75	7	2.88889	5.375	3.57143	5	4.16667	4.66667			1
Female	606	1	65	79.3	9	0	8	9	1	0	4	3	3	5	4	3	4	3.71429	4	5	5	23	0	2	23	6	1	4	4	12	3	1	5.33333	3.75	2.66667	2.66667	5.75	6.66667	5.66667	4.5	4.71429	4.53846	3.5	4.5	4	98.3333	0
Male	607	1	65	65	7	0	5	7	0	0	5	3	2	4	4	5	4	3.85714	5	5	4	18	0	2	20	2	3	1	1	4	0	1	3.33333	4.75	3.16667	3.83333	6.75	6.83333	3.77778	6.125	4.28571	3.76923	3.33333	4.5			1
Female	608	1	50	61	10	0	0	10	0	0	2	2	2	2	4	1	3	2.28571	2	4	4	13	0	1	19	1	1	1	0	2	2	2	2.83333	2	4.66667	2.5	4.5	6.83333	1.33333	4.625	2.85714				3	54	0
Male	609	1	57.5	57.5	6	1	0	7	0	0	4	3	3	4	4	3	3	3.42857	2	4	3	2.5	0	3	19	1	3	1	1	3	0	1	4	1.75	4.5	3.33333	7	7	4	4.75	4.57143	4.84615	3	5			1
Male	610	1	60	60	7	0	0	7	0	0	3	1	1	3	2	2	1	1.85714	1	5	5	13	0	1	22	5	3	4	4	12	0	1	7	5.25	6.5	5.66667	4.5	6	5.77778	6.625	5	4.15385	3	4.83333	1	10.2102	1
Male	611	1	50	50	8	3	10	11	0	0	3	1	2	4	3	5	5	3.28571	5	5	5	18	0	1	20	3	3	3	1	6	0	1	6	6.25	2.83333	1.66667	5	6.66667	7	3.875	5	4.69231	4.5	4.5	2	32.1321	1
Female	612	1	60	73.2	9	0	2	9	0	0	5	1	1	1	4	3	3	2.57143	2	5	5	26	0	1	21	3	3	3	3	9	0	2													3	72	0
Male	613	1	75	75	10	0	5	10	1	0	5	3	2	4	4	5	4	3.85714	5	4	3	8	0	1	22	4	2	3	2	5	0	1										4.38462	4.33333	4.66667	3	65.4655	1
Male	615	1	60	60	8	4	0	12	0	0	1	1	1	2	1	1	1	1.14286	1	4	2	2.5	0	1	19	1	1	1	0	1	2	2	2.16667	1	1.83333	5.16667	7	4.33333	1.11111	1.875	1	4.07692	3.5	2.66667	2	30.6306	1
Male	616	1	71	71	8	1	5	9	0	0	5	2	3	4	4	4	5	3.85714	5	4	4	13	0	1	19	2	3	1	0	2	0	1	3.33333	2.25	4.5	4	4.75	5.33333	5	5	4.42857	3.53846	3	4.16667	1	12.012	1
Female	617	1	40	48.8	2	1	2	3	0	0	5	3	2	4	4	4	5	3.85714	3	5	5	8	0	1	21	3	1	3	3	9	2	3	5.16667	2.75	4.5	4.5	7	6.5	2.77778	4.375	3.28571	4.76923	3.83333	4.83333			0
Male	619	1	75	75	9	2	2	11	1	0	5	5	5	5	5	5	5	5	4	4	2	13	0	2	19	1	1	1	0	1	2	1	3.33333	2.75	3.83333	6	6.5	7	5.66667	5.75	5.14286	4.84615	4.5	4.83333			1
Female	620	1	40	48.8	6	0	2	6	1	0	5	3	2	5	4	3	3	3.57143	2	4	4	13	0	2	20	3	3	2	0	3	0	0	3.66667	4	4.83333	4.66667	5.5	6	5.33333	5.375	4.85714	4.92308	4.16667	5			0
Male	621	1	60	60	9	3	2	12	0	0	5	4	4	5	5	5	5	4.71429	4	5	5	18	0	1	19	1	1	1	0	2	3	1	6.5	4	5.66667	6.16667	7	7	6.77778	6.375	7	5	3.16667	5	3	66.6667	1
Female	622	1	45	54.9	7	1.5	2	8.5	0	0	2	1	1	1	2	3	3	1.85714	4	5	5	8	0	1	20	2	3	2	0	2	0	0	4.83333	5.5	5.5	2.33333	3	5.5	3.77778	4.25	3	3.15385	1.83333	4.83333			0
Female	623	1	50	61		3	0		0	0	4	3	4	3	5	2	2	3.28571	2	5	5	13	0	1	19	2	1	1	0	2	0	1	4.5	1.5	7	6.66667	6.5	7	4.66667	7	6.85714	3.76923	2	4.5			0
Male	624	1	65	65	8	0	5	8	0	0	4	2	1	4	4	3	3	3	5	3	3	8	0	2	22	4	1	4	3	8	2	1	5.33333	4.25	2.5	4.66667	5	6	3.55556	5.125	3	4.69231	3.66667	4.83333			1
Male	626	1	95	95	12	0	2	12	1	0	4	2	3	5	4	4	3	3.57143	3	4	4	13	0	3	22	6	3	3	4	11	0	1										4.84615	3.33333	4.33333	3	60.3604	1
Male	627	1	40	40	6		0	6	0	0	5	4	5	5	5	5	5	4.85714	1	5	5	13	0	1	20	2	3	1	0	1	0	0	6.83333	2.25	5.83333	5.33333	3.5	6.83333	3.22222	3.625	2	4.30769	1.33333	4.66667	1	2.7027	1
Female	628	1	55	67.1	10	0	10	10	0	0	5	3	1	5	2	4	5	3.57143	4	4	3	2.5	0	2	22	4	2	3	2	8	0	1	4.16667	3.25	1.5	1.66667	1.75	3.83333	2.22222	3.375	2.14286	2.30769	1.5	3.66667			0
Female	629	1	60	73.2	6	0	2	6	1	0	3	2	1	2	2	2	4	2.28571	2	5	5	18	0	2	21	3	3	3	3	9	0	1	4.16667	4.5	4.16667	3.66667	3.25	5	2.88889	4.125	2.85714				3	65.6667	0
Male	630	1	70	70	10	1	2	11	0	0	4	1	1	2	4	2	4	2.57143	4	5	4	8	0	1	21	3	3	3	3	9	0	2	3.5	1.5	3.33333	5.66667	6.25	7	2.11111	4.25	4.14286	4.53846	3.83333	4.66667	3	54.955	1
Female	631	1	48	58.56	7	2	2	9	0	0	1	1	1	1	1	1	1	1	5	5	5	18	0	1	20	2	3	2	1	4	0	2	4.66667	4.5	5.66667	6.33333	6.5	7	4.33333	6.625	6.14286	4.92308	5	4.66667	2	48.6667	0
Male	632	1	70	70	12	0	5	12	0	0	3	1	4	5	5	5	2	3.57143	5	5	4	13	0	1	19	1	3	1	0	2	0	1	6.33333	2	4.33333	4.83333	6.75	7	4.44444	4.625	4	4.30769	3.5	4.66667	2	30.9309	1
Male	633	1	62.5	62.5	6	1.5	2	7.5	0	0	3	1	1	4	3	2	2	2.28571	4	4	2	23	0	1	20	2	1	2	1	4	0	2	5.33333	3.5	5.66667	5.5	6.25	6.66667	3.77778	5.375	5.14286	4.15385	3.66667	4.33333			1
Male	634	1	70	70	12	2	2	14	0	0	4	5	4	5	5	5	5	4.71429	2	4	4	8	0	2	22	4	2	3	3	9	2	2	5	2.25	2.83333	3	6.25	6.5	3.33333	4.875	3.71429						1
Male	635	1	80	80	9	0	0	9	0	0	4	4	4	5	3	3	4	3.85714	2	4	4	13	0	2	18	1	1	1	0	2	0	1	4	3.25	3.5	4.33333	4	4.83333	4	4.875	3.57143	3.84615	3.83333	4	3	69.6697	1
Male	636	1	80	80	8	0	8	8	0	0	3	3	2	1	1	1	4	2.14286	2	1	1	13	0	1	20	2	1	1	0	2	0	1	4.66667	2.75	7	7	7	7	4.77778	7	7	4.92308	4	4.66667	4	76.2763	1
Male	640	1	70	70	9	1	2	10	0	0	3	1	1	4	4	3	3	2.71429	2	5	5	26	0	1	20	3	3	3	2	8	0	0	3.16667	2.5	5.66667	4.16667	3.5	5.66667	4.33333	5.375	4.85714	3.53846	3	4.33333	1	15.015	1
Female	641	1	65	79.3	10	3	2	13	1	0	4	2	1	2	4	2	3	2.57143	4	5	5	8	0	1	21	4	3	4	4	12	0	2	5.5	3.75	5.83333	5	4.75	6.5	6.55556	6.375	6.57143	4.30769	3	4.83333	4	78.3333	0
Female	642	1	55	67.1	7	4	8	11	0	0	5	5	5	5	5	4	5	4.85714	5	4	2	2.5	0	1	20	3	1	1	2	5	3	3										5	4.83333	4.66667			0
Male	643	1	70	70	11	0	2	11	1	0	4	4	4	4	4	3	4	3.85714	4	3	2	13	0	1	20	2	2	1	2	4	3	3	5.16667	3	6.5	5.16667	6	6.16667	5	6.75	6.28571	4.92308	4.5	4.33333	3	71.7718	1
Male	644	1	90	90	10	2	2	12	0	0	5	5	5	5	5	5	5	5	3	5	4	18	0	2	19	2	1	2	1	4	2	3													4	97.2973	1
Male	645	1	80	80	8	0	2	8	0	0	5	1	1	5	5	3	4	3.42857	4	5	5	8	0	2	22	5	2	3	2	8	1	0	6.33333	2.25	5	3.5	5	7	2.33333	4.5	2.14286				4	75.0751	1
Male	646	1	60	60	7	2	0	9	1	0	3	1	1	4	3	2	2	2.28571	1	4	4	18		1	19	2	3	2	1	5	0	2	2.83333	3	4.16667	1.83333	4.75	4.83333	2.22222	2.5	1	3.84615	3	3.83333	2	49.5495	1
Male	647	1					2		0	0	4	1	1	3	5	4	1	2.71429	5	4	5	8	0	1	18	1	3	2	2	5	0	0	5.83333	1.25	2.5	6.16667	6.5	6.33333	2.88889	6.125	2.14286	4.76923	4.33333	4.66667			1
Male	648	1	65	65	7	0	0	7	0	0	5	3	3	5	4	5	4	4.14286	1	5	5	8	0	2	19	1	2	1	0	1	1	1	3.16667	2.75	4.5	2.83333	6	6.83333	5.44444	3.875	4.71429	4.23077	3.83333	4.16667			1
Male	649	1	65	65	8	0	2	8	0	0	2	1	1	2	3	1	2	1.71429	1	5	5	23	0	1	21	4	1	4	3	9	0	1										3.84615	4	4.33333	2	32.4324	1
Female	650	1	75	91.5	10	4	0	14	1	1	4	2	1	4	3	2	1	2.42857	2	2	5	23	0	1	21	3	3	1	1	2	0	0	6.66667	5.75	4.83333	4.66667	5	6.33333	5.33333	5.375	5.71429	3.92308	3.83333	4.5			0
Female	652	1	45	54.9	6	2	0	8	0	0	5	1	1	3	4	4	4	3.14286	2	4	4	23	0	1	22	4	1	4	1	5	0	0	5.16667	6.5	1.83333	1.83333	5.25	6.66667	5.55556	5.75	2.85714	3.61538	3.33333	4	2	30	0
Female	653	1				7	0		0		4	1	1	2	4	2	5	2.71429	4	5	5	13	0	1		1	3	1	1	3	0	0										2.07692	2.16667	3.83333	1	0	0
Male	654	1			6	4	2	10	0	0	5	4	5	5	5	5	5	4.85714	5	5	5	13	0	2	19	1	3	1	1	3	0	2	3.5	3.75	4.83333	4.33333	6.5	7	1.33333	4	1.28571	5	3.83333	5			1
Female	655	1	60	73.2	3	6	2	9	0	1	4	2	1	4	4	5	5	3.57143	3	4	4	18	0	2	19	1	2	1	1	3	2	2	4.5	4.75	3.16667	3	2.5	4.66667	2.88889	3.625	4	2.61538	2.33333	4.16667	3	50.6667	0
Female	656	1	50	61		0	0		0	0	1	1	1	3	4	4	3	2.42857	2	4	5	23	0	2	19	1	3	1	1	3	0	1	5.5	5	6	3.5	4.5	6	6.11111	4.75	5.28571	3.92308	2.83333	4.33333	1	18	0
Male	657	1	85	85	7	3	2	10	0	0	2	2	2	4	3	4	2	2.71429	3	4	5	18	0	1	22	4	3	4	2	8	0	2	2.5	2	3	3.83333	6.75	7	4	4	3.57143	5	5	5	2	37.8378	1
Male	660	1	77.5	77.5	12	0	2	12	1	0	4	4	4	5	5	4	4	4.28571	2	5	2	2.5	0	2	22	4	1	3	2	8	2	1	2.83333	2.75	4.5	5.66667	7	6.83333	3.66667	4.25	3.42857	4.84615	4.5	4.83333			1
Male	661	1	70	70	7	2	2	9	0	0	5	2	3	3	4	4	4	3.57143	2	5	5	2.5	0	2	22	5	2	4	4	12	2	2	6.16667	4	5	5.5	6.75	6.66667	5.11111	5.5	4.57143	4.38462	3.33333	4.33333	2	26.1261	1
Male	662	1	90	90	10	3	2	13	1	0	3	2	4	4	3	4	3	3.28571	3	5	5	26	0	2	20	3	1	3	2	7	2	0	4	3.25	4	4.33333	2.75	5.16667	5.55556	4.25	4.85714	3.23077	2	4.16667	3	57.0571	1
Male	663	1	90	90	3	2	2	5	0	0	5	5	5	5	5	5	5	5	2	5	4	26	0	1	19	2	1	2	1	4	2	1	4.66667	2.75	5	6	7	7	5.77778	5.75	3.57143	5	4.16667	5	3	60.6607	1
Female	664	2	60	73.2	7	0	2	7	1	1	5	5	5	5	5	5	5	5	1	5	5	2.5	0	1	22	4	2	4	3	11	3	0	3.83333	1	1.83333	1.66667	3.5	6.16667	3.22222	3.25	1.57143	4.61538	4.16667	5	4	93.6667	0
Male	665	1	90	90	10	1	5	11	0	0	4	1	1	1	3	2	2	2	2	3	2	2.5	0	1	22	4	3	2	0	2	0	1	5.83333	6.75	5.83333	5.66667	6.75	7	6.77778	6.25	6.57143				1	17.7177	1
Female	666	1	63	76.86		10	0		0	0	5	3	2	4	4	4	4	3.71429	2	5	5	8	0	1	20	2	2	2	2	4	2	1	6	7	6.83333	5	6.25	6.5	4.55556	6.25	4.85714	3.23077	3.16667	3.83333	3	56.6667	0
Male	667	1	125	125	11	1	8	12	0	0	5	5	4	5	5	2	4	4.28571	4	2	2	13	0	2	21	4	1	4	4	11	2	3	5	4.25	5.66667	6.16667	6.25	6.5	5.11111	5.625	6.28571	4.61538	4.33333	5	4	94.2943	1
Male	668	1	90	90	2	4	2	6	0	0	4	3	2	3	4	3	3	3.14286	1	4	5	18	0	2	19	2	1	2	2	4	0	1	3.5	2	5	4.16667	6	6.5	3.77778	5.375	4	4.07692	3.5	5	1	23.4234	1
Male	670	1	60	60	8	0	2	8	0	0	3	4	4	5	5	2	4	3.85714	4	3	4	8	0	1	18	1	1	1	0	2	2	3	3.16667	2.25	4.33333	5.5	6.25	6.66667	3.33333	5.125	4.28571	4.69231	3.83333	4.66667			1
Male	671	1	65	65	7	2	8	9	0	0	5	2	2	2	4	4	4	3.28571	5	5	5	26	0	2	21	4	3	3	3	8	0	0	3.33333	4	5.66667	4.66667	6.5	6.83333	3.88889	6.375	4.85714	4.69231	3.66667	5	2	35.1351	1
Male	672	1	55	55	6	3.5	2	9.5	1	0	5	2	3	4	5	5	4	4	2	4	4	23	0	1	21	3	3	3	2	8	0	3	4.66667	4	4.16667	5.83333	7	7	3.22222	6.125	3.28571	4.84615	4	5	1	21.021	1
Male	673	1	60	60	6	2	2	8	0	0	5	3	3	4	4	2	4	3.57143	3	5	5	13	0	2	18	1	1	1	0	1	0	1	3.16667	2.5	2.5	2.5	4	5.83333	3.11111	5.375	3.14286	3.69231	3.33333	3.83333			1
Male	674	1	13.5	13.5	5.5	3.5	2	9	0	0	4	2	3	5	4	3	3	3.42857	4	4	5	18	0	2	18	1	3	1	0	1	0	0										4.69231	4.16667	5			1
Female	675	1	50	61	7		0	7	0	0	4	1	3	5	5	5	5	4	1	5	5	26	0	1	22	4	1	4	4	12	2	1	4.16667	1.75	6.16667	4.16667	2	5.16667	3.88889	6	4.85714	4.30769	2	4.5	4	82	0
Male	677	1	45	45	9	1.5	5	10.5	0	0	5	2	2	5	4	4	4	3.71429	4	5	5	26	0	2	22	4	3	3	3	9	0	0	4.83333	3	3.33333	3	5.25	5.83333	4	4.5	3.42857	3.69231	3.66667	4.16667	1	8.10811	1
Female	678	1	50	61	9	1	2	10	0	0	3	1	1	1	2	2	2	1.71429	2	4	4	26	0	1	21	4	3	4	3	11	0	2	3.83333	3.5	3.83333	3.5	6	6.5	4.22222	6.375	6.28571	4.15385	3.16667	4.16667	2	31	0
Female	680	1	50	61	7	2	2	9	0	0	2	1	1	1	3	2	2	1.71429	2	5	5	18	0	1	23	5	1	4	4	13	2	1	6	4.75	6.33333	5.83333	5	6	4.55556	6.375	5.71429	4.07692	2.83333	4.16667			0
Female	681	1	45	54.9	6	0	2	6	0	0	1	1	1	1	1	1			2	5	5	23	0	2	19	2	1	2	1	5	2	3	5.5	4.75	4.5	4.83333	5.25	6	5.33333	4.625	4.71429	4.38462	4.33333	5	3	63.6667	0
Female	682	1	45	54.9	6	0	0	6	0	0	4	3	3	4	4	4	4	3.71429	2	5	5	18	0	2	19	1	3	1	0	2	0	2	4.33333	2.25	4.16667	2.5	4	6	4	3.5	5.14286	4.30769	2.16667	4.16667			0
Male	684	1	65	65	2	2	5	4	0	0	2	2	2	3	2	4	5	2.85714	5	5	5	26	0	2	21	3	3	2	2	6	0	0	3.83333	5.25	2.66667	5.16667	5.75	6.83333	3.66667	6.125	5.71429	5	4.66667	5			1
Female	685	1	85	103.7	10	0	5	10	1	0	3	3	2	4	5	5	2	3.42857	5	4	4	13	0	1	21	4	1	3	2	8	3	3										3	3.16667	2.66667	4	93	0
Female	686	1			10	1	2	11	1	0	5	2	2	5	5	5	4	4	2	5	5	23	0	2	20	3	3	3	3	7	0	0	6	5.5	5.5	3.5	5.25	6.83333	6.77778	6.375	6.57143	4.38462	3.33333	4.5	3	69.3333	0
Male	687	1	50	50	9	2	2	11	0	0	4	1	1	4	5	5	5	3.57143	2	4	5	23	0	5	19	2	1	2	0	2	0	0	3.5	1	4	2	7	6.83333	3.11111	1.875	2	5	3.5	3			1
Male	688	1	65	65	1	1	2	2	0	1	5	4	5	5	5	5	4	4.71429	2	4	4	13	0	1	21	3	2	3	3	8	2	0										4.76923	3.83333	4.83333	2	35.4354	1
Female	689	1	75	91.5	9	0	0	9	0	0	5	4	4	4	4	3	4	4	1	5	5	23	0	1	21	3	3	3	2	8	0	0	5.16667	3	5.16667	4.83333	4.75	6.83333	5.88889	5.5	6.71429	3.76923	3.33333	4.66667	3	59	0
Female	691	1	55	67.1	6	0	2	6	0	0	2	1	1	1	4	1	5	2.14286	1	5	5	8	0	1	20	3	2	3	0	3	2	1	6.16667	3.75	6.16667	4.83333	4.75	7	5	6.25	5.42857	3.84615	3.16667	4.5	2	48.3333	0
Male	694	1	30	30	6	1	0	7	1	0	4	1	1	3	4	4	5	3.14286	5	5	5	23	0	1	19	1	3	1	0	2	0	1	1.66667	1	1.66667	2.5	2.5	5.5	1.55556	1.75	1	3.61538	1.66667	3.33333			1
Female	695	1	50	61	7	0	2	7	0	0	5	3	3	4	4	3	4	3.71429	4	4	4	18	0	3	22	4	1	4	2	9	2	3	5	4.5	2.33333	5.16667	6	6.66667	2.66667	5.5	5.14286	5	5	4.33333			0
Female	696	1	45	54.9	6	1	8	7	0	0	4	1	3	3	5	4	3	3.28571	5	5	5	23	0	1	22	6	1	5	3	11	1	1	6	3.25	6.16667	3.66667	4.5	6.16667	6.11111	5.5	6	4.53846	3.66667	4.83333			0
Male	697	1	85	85	11	7	2	18	0	0	4	2	3	3	4	3	3	3.14286	4	4	5	18	0	2	20	2	1	2	1	3	0	0	4.83333	3.25	5	6.16667	3.5	5.66667	3.11111	5.75	5	3.84615	2.83333	4			1
Male	698	1	65	65	12	0	2	12	0	0	5	1	1	4	3	2	2	2.57143	2	1	1	2.5	0	2	19	1	3	1	0	2	0	0	2.66667	2.5	2.83333	2.5	5.5	5.5	1.44444	4	1.71429	3.84615	3.83333	3.66667			1
Male	699	1	70	70	7	3	5	10	0	0	5	2	5	5	5	5	5	4.57143	4	4	2	8	0	1	21	3	1	3	0	5	0	1	2.16667	1	3.16667	2	3.5	6.16667	1.88889	3	1.71429	4.38462	3.16667	4.33333	2	39.9399	1
Male	700	1	105	105	10	0	2	10	0	0	5	3	5	5	5	2	4	4.14286	1	4	4	18	0	2	21	4	1	4	3	10	0	1	5	3.75	4.83333	3.33333	5.5	6	3.77778	5.125	4.57143	4.07692	3.33333	4.33333	4	75.3754	1
Female	701	1	40	48.8	6	2	0	8	1	0	4	4	2	2	4	2	2	2.85714	1	5	5	26	0	1	18	1	3	1	1	3	0	2	3.83333	2.75	5.5	5.33333	4.5	6.16667	6.44444	6.625	7	4	2.66667	2.83333			0
Female	702	1	50	61	7	1	0	8	0	0	4	1	1	3		2	3			4	4	18	0	2	18	1	3	1	0	2	0	0	5.5	4.5	6.16667	3.16667	5	7	5.55556	5.625	5.57143	4.30769	3.16667	4.33333	1	0.333333	0
Male	703	1			8	2	2	10	0	0	4	2	2	4	4	5	3	3.42857	5	5	5	8	0	1	18	1	1	1	0	1	0	1	4.83333	3.5	4.5	3.66667	5.25	5.83333	4.44444	4.875	4.85714	3.84615	2.83333	3.83333			1
Female	704	1	70	85.4	11		2	11	0	0	2	2	2	3	5	1	1	2.28571	5	5	5	18	0	1	20	2	2	1	0	2	2	2	3	4.75	5.83333	5	6.5	6.5	5.66667	5.625	4.28571	3.76923	4.33333	4			0
Male	705	1	55	55	7	2	2	9	0	0	5	1	1	4	4	4	3	3.14286	2	5	5	8	0	1	22	4	1	3	3	9	0	0	5.16667	3.25	3.33333	5.16667	5.75	6.83333	5.44444	5.75	2.28571	4.23077	3.66667	4.66667	1	13.5135	1
Female	706	1			8		0	8	0	0	2	1	1	1	2	4	4	2.14286	3	5	5	8	0	1	22	4	1	2	3	7	0	1	3.83333	4.5	5.83333	5	3.25	5.66667	5.33333	5.375	4.85714	3.84615	2.83333	4.33333	1	7.33333	0
Female	709	1	30	36.6	6	1	10	7	0	0	5	1	3	4	4	2	3	3.14286	5	5	5	8	0	1	21	3	3	1	2	5	0	0										4.38462	2.5	4			0
Female	710	1	50	61	6	0	0	6	0	0	3	3	2	3	3	4	3	3	2	5	4	18	0	1	21	3	3	3	0	3	0	2	5.16667	4.75	2.83333	2.66667	2	5	5.44444	4.125	4.57143	2.38462	2.16667	3.5			0
Male	711	1	50	50	6	1	5	7	0	0	1	1	1	3	2	2	1	1.57143	4	4	5	18	0	1	20	2	3	1	1	3	0	0	3.5	1.5	4	1.83333	2.5	4.33333	2.33333	2.875	2	3.84615	3.66667	4.33333			1
Male	713	1	80	80	7	1	2	8	0	0	3	3	2	5	5	4	3	3.57143	5	5	5	13	0	1	20	2	1	2	0	3	0	1	2.33333	1.75	3.66667	3.16667	6	5.83333	2.11111	3.625	2.14286	4.30769	3.83333	4.33333			1
Female	714	1	45	54.9	6	0	0	6	1	0	4	1	1	3	5	2	3	2.71429	2	5	5	23	0	1	18	1	1	1	1	3	2	3	5.5	4	5	5.16667	5	6.33333	3.88889	5.375	4	3.92308	2.5	4.83333	4	83.3333	0
Male	715	5	75	75	9	0	0	9	0	0	3	3	3	4	4	4	3	3.42857	4	5	5	23	0	1	19	1	1	1	0	1	0	0	6.33333	3.5	5.66667	5.16667	6	6.16667	6.11111	5.875	5.71429	5	4.33333	4.83333			1
Female	716	1	60	73.2	7	0	5	7	0	0	4	1	1	2	2	2	2	2	5	5	5	26	0	1	18	1	1	1	1	3	0	0	5	6.25	4.66667	5.66667	5	6.66667	3.77778	5.25	3.71429	3.69231	3.16667	4.5	1	16.3333	0
Male	717	1	90	90	7	0	2	7	1	0	2	1	1	5	4	5	3	3	2	4	2	8	0	1	21	6	1	4	4	11	2	1	4.83333	3.25	5.83333	5.33333	6.75	6.33333	2.77778	5.875	4	4.46154	3.5	4.33333	3	67.8679	1
Female	718	1	45	54.9	7	0	2	7	0	0	4	1	2	2	2	2	3	2.28571	2	4	2	18	0	2	19	2	1	2	1	5	2	2										3.30769	2.33333	2.83333	3	66.6667	0
Male	719	1	70	70	7	1	2	8	0	0	4	3	3	4	4	5	4	3.85714	3	4	3	2.5	0	1	19	2	1	2	0	2	0	2	5.16667	4.75	5	5	4.25	5.66667	5.11111	5.125	5	3.84615	3.16667	4.16667	2	27.9279	1
Male	720	1	70	70	9	1	0	10	0	0	4	2	2	5	5	2	2	3.14286	1	5	5	13	0	1	20	3	1	3	2	8	0	2	3.16667	2.5	3.5	1	6.25	6.66667	2.77778	6	4.85714	4.69231	3.83333	4.5			1
Male	721	1	60	60	7	0	0	7	0	0	5	3	5	4	5	5	5	4.57143	2	5	5	23	0	1	18	1	2	0	0	0	2	1	3	1	3.5	3.5	6.5	7	4	3.125	4.14286	5	3.16667	5	1	12.6126	1
Male	722	3	70	70	9	3	5	12	0	0	5	2	4	4	4	3	4	3.71429	4	3	3	8	0	1	22	5	1	4	3	11	3	2										4.15385	3	5			1
Female	723	1			6	1	2	7	0	0	3	2	2	5	5	5	2	3.42857	5	5	5	26	0	1			3	1	1	3	0	2	5.83333	4.75	6.16667	5.5	5.75	6.83333	4.77778	6.375	5.57143	4.76923	3.33333	5			0
Male	725	1	100	100	10	2	2	12	0	0	5	5	5	5	5	5	5	5	1	5	2	8	0	2	21	3	1	2	1	5	2	2	3.33333	1	1.66667	1.66667	7	7	4.22222	4.625	6.71429	5	4.66667	5	4	94.5946	1
Male	726	1	45	45	7	0	0	7	0	0	3	1	1	3	2	3	2	2.14286	1	4	5	23	0	1	19	1	3	1	0	2	0	2	3.16667	1	2.5	1.33333	2.75	5.5	1.77778	2.75	1.71429	3.92308	3.66667	4.16667			1
Female	727	1	60	73.2	9	1	2	10	0	0	5	1	1	1	4	2	2	2.28571	3	5	5	26	0	2	20	2	1	2	2	4	0	0										3.76923	3.33333	4			0
Male	728	1	45	45	6	1	2	7	0	0	4	2	2	4	3	2	4	3	4	5	5	18	0	2	22	4	3	4	2	8	0	2	4.16667	2.25	4.33333	3.33333	4.25	5.66667	4.11111	4.25	3.57143	4.76923	3.83333	5			1
Male	730	1	95	95	13	0	2	13	0	0	4	1	1	4	5	3	5	3.28571	4	4	4	8	0	2	19	1	1	1	0	1	2	2	4.33333	3.5	6.16667	3.5	3.75	6.5	3.88889	5.25	5.28571	3.53846	2.83333	4.5			1
Female	731	1	40	48.8	9	1	0	10	0	0	3	1	2	3	3	5	3	2.85714	3	5	5	26	0	2	21	3	1	3	3	9	2	2	4	3.75	4.33333	2.66667	3.75	5.66667	4.11111	3.75	4.42857	4.07692	3.16667	4.5			0
Male	732	1	70	70	10	0.5	0	10.5	0	0	4	2	2	3	4	4	3	3.14286	2	4	4	13	0	1	20	2	3	2	2	6	0	2	6.16667	1.75	2.83333	2.83333	4.25	7	5.33333	5.25	6.14286	3.84615	2.83333	4.5			1
Female	733	1	35	42.7	8	2	2	10	0	0	1	1	1	1	4	4	1	1.85714	3	5	5	23	0	2	20	2	1	2	1	5	0	1	4	7	6	4.16667	3.5	5.33333	6.33333	5.5	4.28571	3.61538	2.66667	4			0
Male	734	1	105	105	12	0	2	12	1	0	5	4	5	5	5	2	4	4.28571	1	4	3	13	0	3	21	3	3	2	2	7	0	2	3.66667	4.5	3.83333	5.66667	6.25	6.5	3.22222	5.125	2.57143	4.61538	3.83333	4.16667	3	72.0721	1
Male	736	1	60	60	10	1	0	11	0	0	3	1	1	2	1	2	3	1.85714	1	4	4	8	0	2	20	2	1	2	1	4	0	1	4.33333	3	3.16667	2.66667	2.5	4.66667	3.88889	3.875	3.71429	3.46154	2.5	3.5	1	18.3183	1
Male	737	1	75	75	10	0	0	10		0	4	3	3	5	5	4	3	3.85714	3	4	4	13		1	18	1	2	1	1	2	0	1	4.16667	6	4.33333	4.16667	7	6.66667	5.44444	5.5	6.28571	4.30769	3.83333	4.66667	3	62.1622	1
Female	738	1	30	36.6	7	2	5	9	0	0	4	1	1	4	4	4	4	3.14286	4	5	5	23	0	1	22	4	1	2	2	5	2	0	6.16667	7	6.16667	4	5.25	6.66667	5.88889	6.125	4.85714	3.69231	3	3.83333	2	37.3333	0
Female	739	1	55	67.1	8	2	2	10	0	0	4	2	1	1	4	4	5	3	5	5	5	13	0	1	19	1	1	1	1	2	2	2	4	3.5	3.16667	4.16667	4.25	6	2	4.25	2.14286	4.23077	4.66667	4.16667	2	46	0
Female	740	1	40	48.8		0	0		0	0	3	1	1	1	2	3	2	1.85714	2	4	4	13	0	2	19	1	1	1	0	2	0	1	4.5	5	3.33333	3.66667	3.25	3.66667	3	4.125	3.28571	3	3	3.16667			0
Female	741	1	50	61		0	0		0	0	5	3	2	2	4	4	4	3.42857	2	5	5	8	0	1	20	3	3	3	2	8	0	0	5	3	5.66667	5.66667	5.75	6.5	4.77778	6.25	4.85714	4.38462	3.5	5	2	28.6667	0
Male	742	1	60	60	8	1	2	9	0	0	3	2	2	4	4	4	4	3.28571	4	4	4	26	0	1	20	2	3	1	1	3	0	1	3.66667	2.5	5.33333	4.83333	3.75	6.16667	4.77778	5.625	4.28571	4.61538	3.83333	4	1	15.9159	1
Male	743	1	35	35	2	2	0	4	0	0	5	1	1	5	4	2	3	3	1	5	5	8	0	2	22	4	3	3	4	11	0	0	6.83333	1.25	6.83333	3.83333	6.25	6.33333	6.77778	6.125	7	4.92308	4.33333	5	1	6.30631	1
Female	746	1	55	67.1	7	4	2	11	0	0	5	2	2	3	4	4	4	3.42857	4	4	4	18	0	2	21	4	1	4	3	8	2	2										4.69231	3.83333	4.83333	1	21	0
Female	747	1	45	54.9	6		2	6	0	0	5	5	1	5	5	4	4	4.14286	4	4	4	18		1	19	1	1	1	1	3	2	3	7	5	7	7	7	7	6	5.375	3.57143	4.69231	3.33333	4.83333			0
Female	748	1	35	42.7	6	1	2	7	0	0	2	1	1	1	1	1	2	1.28571	4	4	5	26	0	1	20	2	1	2	1	5	2	1	4.33333	4.5	3.83333	4.16667	2.25	3.83333	3	3.75	2	3.15385	2.5	3.5			0
Male	750	1	55	55	8	0	0	8	0	0	4	4	4	4	5	5	3	4.14286	3	4	2	2.5	0	2	18	1	1	1	0	2	0	1	2.16667	1.5	2.83333	5.16667	5.75	6.66667	3.22222	4.25	3.71429	4.69231	4.66667	4.83333			1
Female	751	1	75	91.5	7	2	8	9	0	0	5	4	5	5	5	3	5	4.57143	3	5	1	13	0	1	22	4	2	2	0	3	3	3	5.66667	6.75	6.83333	6.33333	5.5	7	3.88889	6.5	5.42857	5	3.66667	5			0
Male	752	1	80	80	12	0	2	12	0	0	3	1	1	2	3	2	2	2	5	3	2	8	0	1	21	3	3	3	2	8	0	2	1	1.5	2.33333	1.33333	6.25	7	4.88889	5.5	5.85714	4	3.16667	4.5	2	33.033	1
Female	753	1	80	97.6		2	2		0	0	5	4	4	3	4	4	4	4	2	5	1	23	0	1	21	2	2	2	1	3	0	2	7	5.5	7	7	5.5	6.5	3	7	6.14286	3.92308	3.66667	4	2	44	0
Male	754	1	65	65	9	0	2	9	0	0	5	3	4	4	4	2	2	3.42857	5	4	4	13	0	1	19	2	1	2	1	5	0	0	5	3.25	4.16667	4	6	6.33333	3	5.25	4.28571	3.92308	3.5	4.33333			1
Male	755	1	65	65	7	3	2	10	0	0	2	2	2	2	5	4	2	2.71429	1	4	5	26	0	1	20	3	1	1	2	5	0	3	3	1	2.66667	4.33333	6.75	6.83333	1.88889	5.25	2.14286	4.76923	4.5	5			1
Female	756	1	55	67.1	7	0	8	7	0	0	2	1	1	1	2	4	2	1.85714	5	4	5	26	0	1	21	3	1	2	2	6	0	1	4	4.75	1	1	2	4.66667	4.55556	2.875	1.85714	4.30769	3.66667	4.83333			0
Female	757	1	50	61	6	8	2	14	0	0	5	2	3	5	5	1	1	3.14286	4	5	5	18	0	1	21	4	1	2	3	6	2	0										4.23077	4	4	4	96	0
Male	758	1	65	65	3	0	0	3	0	0	4	3	3	3	3	3	4	3.28571	3	4	4	23	0	1	19	1	1	1	0	1	1	2	4.83333	3	6.33333	5.66667	5.5	7	5.22222	5.125	4.42857	4.23077	3.5	4	1	5.70571	1
Male	759	1	60	60	7		2	7	0	0	3	2	2	4	3	2	2	2.57143	5	4	3	2.5	0	3	21	4	1	2	3	9	2	2	3.83333	2.5	2.83333	2.16667	4.25	6.33333	2	3.25	2.57143	4.61538	3.66667	4.66667			1
Male	760	1	80	80	10	0	0	10	0	0	3	3	3	4	4	3	3	3.28571	2	4	4	8	0	2	21	3	3	3	2	7	0	2	5.5	4.75	5.83333	5.16667	4.5	6.33333	4.44444	6.5	5.71429	4.23077	3.33333	4.83333	2	48.6486	1
Male	761	1	73	73	13	1	0	14	1	0	3	1	1	4	4	2	3	2.57143	1	5	5	8	0	2	21	4	3	3	3	10	0	2										5	3.33333	5			1
Male	763	1	71.95	71.95	9.75	0	0	9.75	0	0	5	1	1	1	5	3	2	2.57143	2	5	5	18	0	3	19	2	1	2	1	5	2	2	6.5	4	4.66667	4.16667	5.5	6	4.77778	5.25	5.42857	4.84615	3	4.33333	3	55.2553	1
Female	766	1	55	67.1		1	2		0	0	5	4	3	5	5	5	5	4.57143	3	5	4	8	0	1	19	2	3	2	2	6	0	3	5.83333	2.75	2.33333	1.66667	4.5	6.66667	6.11111	6.75	6.85714	4.61538	3	4.66667	3	71	0
Male	767	1	80	80	12	0	2	12	0	0	4	1	3	4	4	4	3	3.28571	5	4	3	8	0	1	21	3	3	3	2	8	0	2	4.33333	3	1.83333	2.83333	6	7	2.11111	4.125	1.85714	4.61538	4.16667	5	3	69.97	1
Female	768	1	35	42.7	6	1	2	7	0	0	2	1	1	1	1	2	4	1.71429	3	5	5	2.5	0	3	20	2	1	1	2	5	0	0										4.38462	4.33333	4.66667			0
Female	769	1	45	54.9	7	0	2	7	0	0	5	1	1	1	1	1	2	1.71429	4	5	5	18	0	1	18	1	2	1	0	1	0	1	6.33333	6.5	5.66667	6.16667	6.5	7	6.22222	7	7	4.15385	3.5	5	1	20.6667	0
Female	771	1	40	48.8	8	1	0	9	0	0	5	2	1	2	5	1	3	2.71429	3	5	5	13	0	1	19	2	3	2	2	6	0	2										3.69231	3.33333	4	1	8	0
Female	773	1	30	36.6	7	0	8	7	0	0	1	1	1	1	1	1	1	1	5	4	5	18	0	1	19	2	3	2	0	2	0	2	4.16667	3.25	3.66667	4	6	6	2.88889	4.75	2.71429	3.76923	3.83333	4			0
Male	774	1	70	70	10	2	2	12	0	0	2	1	1	1	2	2	2	1.57143	1	4	5	18	0	2	21	3	1	3	3	9	0	1	2.66667	1.25	1.33333	2.83333	4.25	6.5	1.33333	3.625	2						1
Female	775	1	45	54.9	12	2	2	14	0	0	5	1	1	5	5	5	5	3.85714	3	5	5	23	0	1	20	3	1	1	1	3	1	1	6.5	6.25	6.5	4	7	7	7	6.25	5.14286	4.69231	4.5	4.83333	2	39.6667	0
Female	776	1	62.5	76.25	7	3	0	10	0	0	4	3	3	5	5	4	3	3.85714	4	5	5	26	0	1	18	1	1	1	0	2	0	2	3	1.5	5.5	6	6	7	3.77778	6.375	6.57143	4.38462	3.5	4.66667			0
Male	777	1	95	95		2	2		1	1	2	1	1	1	4	3	2	2	4		1	23	0	2	22	5	3	4	4	11	0	2										3.61538	1.83333	4	3	60.961	1
Female	778	1	35	42.7			0		0	0	3	2	2	4	3	3	3	2.85714	2	4	4	23	0	2	20	2	1	2	1	5	0	2										3.46154	3	3.66667			0
Female	779	1	55	67.1	6	1	2	7	1	0	4	2	3	2	4	3	3	3	4	5	3	8	0	2	18	1	3	1	1	3	0	0	4.5	4.5	3.16667	3.16667	3.75	5.33333	7	5.25	3.42857	4	3.16667	4.66667	2	33	0
Female	781	1	55	67.1	11	0	0	11	1	0	5	1	1	2	5	4	5	3.28571	2	5	5	23	0	1	18	4	3	4	2	8	0	0	5.33333	1.5	5.16667	2.66667	6.25	7	4.44444	4.625	4.14286	4.46154	4.16667	5			0
Male	783	1	100	100	10	0	0	10	1	1	5	4	5	4	5	3	4	4.28571	2	3	2	2.5	0	1	22	4	3		2	5	0	1	3.83333	2	4.5	2	5.75	6.16667	2.88889	2.875	3	4.15385	2.83333	4.66667			1
Male	784	1	80	80	9	2	2	11	0	0	5	3	4	5	5	5	3	4.28571	4	5	5	13	0	1	21	4	1	4	2	10	0	2	5	4	5	5	7	7	5	7	6.14286				3	53.1532	1
Female	785	1	50	61	7	1	2	8	0	0	4	1	1	1	5	2	3	2.42857	2	5	5	26	0	1	19	2	3	2	1	5	0	3	4.66667	4.5	5	4	3.25	6	5.44444	4.75	3.71429	3.92308	3	4.66667	3	71.3333	0
Male	786	1	60	60	8	1	8	9	0	0	3	1	1	1	1	2	2	1.57143	4	4	3	2.5	0	1	18	1	3	1	0	2	1	1	3	2.25	3.33333	3.16667	5.25	5	2.66667	3.125	2.85714						1
Female	787	1	35	42.7	6		0	6	0	0	3	1	1	2	4	3	2	2.28571	2	5	5	8	0	1	19	1	3	1	1	3	0	0										3.53846	2.5	4.16667			0
Female	788	1	40	48.8	6		0	6	1	0	4	2	2	2	2	2	3	2.42857	2	4	4	18	0	1	20	2	3	2	1	5	0	1	2.16667	2	2.66667	1	3.25	6.5	2.66667	1.75	2.71429	3.23077	1.66667	4	1	22.6667	0
Female	790	1	30	36.6	2	1	2	3	1	0	4	2	1	4	4	3	4	3.14286	2	5	5	18			22	4	2	1	1	3	0	0	3.83333	4	4.66667	3.5	3.75	4.66667	3	4	2.71429	3.84615	3.66667	3.5	1	9.66667	0
Female	791	1	45	54.9	7	2.5	0	9.5	0	1	5	3	2	4	4	1	4	3.28571	1	5	5	8	0	1	18	1	1	1	1	3	2	2													1	19	0
Male	792	1	55	55	7	2	10	9	0	0	2	1	3	4	3	2	3	2.57143	5	4	3	8	0	1	22	4	1	0	1	1	2	3	2.16667	2.25	3.5	5	5.25	5.33333	4.55556	4.625	4.85714						1
Male	793	1	85	85	8	0	0	8	0	0	4	3	3	5	5	4	4	4	2	5	4	8	0	1	20	2	1	2	2	6	2	3	3.33333	3.5	3.83333	4.16667	4.5	6.5	3.66667	4.25	4	4.30769	3.66667	5	3	72.973	1
Female	794	1	55	67.1	7	1	0	8	0	0	4	1	1	3	4	4	4	3	1	5	5	13	0	1	20	3	3	3	2	8	0	0	4.5	5.25	4.5	4.16667	5.75	6.16667	6.11111	6.125	4.85714	4.07692	2.83333	5			0
Male	796	1			9	0	5	9	0	0	5	3	1	5	5	5	4	4	4	5	5	8	0	1	22	4	1	3	2	7	0	1										5	5	5	3	54.0541	1
Female	797	1	42	51.24	6	3	0	9	0	0	3	1	1	1	3	2	2	1.85714	2	5	5	18	0	1	19	1	3	1	0	2	0	1	4.66667	3.5	4.33333	3.83333	4.25	6.33333	6	5.75	5.14286	3.53846	2.5	4.83333			0
Female	798	1	45	54.9	8	1	2	9	0	0	5	1	2	4	4	5	4	3.57143	2	5	5	23	0	1	22	4	2	3	3	9	2	1	4.5	4	5.5	2.16667	4.5	6.33333	5.33333	5.125	4.71429	4.07692	3.33333	4.16667			0
Male	799	1	70	70	7	1	2	8	0	0	1	1	1	5	5	4	3	2.85714	4	5	5	18	0	1	21	3	1	3	2	7	1	1	2.16667	1.5	3.66667	3.83333	4.5	5.5	1.77778	4.375	1.85714	4.30769	3.5	4.66667	1	4.8048	1
Female	801	1	45	54.9	6	2	5	8	0	0	4	1	1	1	4	4	4	2.71429	4	5	5	13	0	1	20	3	1	1	2	5	0	1	5	4	5.5	4.16667	4.5	6	3.44444	5.375	4.14286	3.61538	3	4.66667	2	26.6667	0
Male	802	1	75	75	8	2	2	10	0	0	5	5	5	5	5	3	4	4.57143	2	4	3	2.5	0	1	18	1	2	1	1	3	0	1	3.16667	1	1.66667	5.33333	7	7	2.11111	2.75	3.57143				2	35.7357	1
Male	804	2	65	65	6	0	2	6	0	0	5	1	1	4	4	5	3	3.28571	4	5	5	23	0	1	20	3	3	3	3	9	0	0	4.16667	3.5	4.66667	5	5	6.33333	3.33333	5.25	4.42857	4.84615	3.66667	4.83333	2	27.027	1
Male	805	2	50	50	8	1	10	9	0	0	5	5	5	5	5	5	5	5	5	5	5	26	0	1	20	2	3	1	0	2	0	3	3	1.25	1.83333	3.83333	3.5	6	1.33333	4	2	4.84615	3	4.33333			1
Male	806	1	80	80	12	0	2	12	0	0	5	1	2	4	4	3	4	3.28571	4	5	5	18	0	1	18	2	3	2	1	4	0	0															1
Female	807	2	53	64.66	6	1	0	7	0	0	3	4	3	4	4	2	4	3.42857	1	5	4	13	0	1	19	1	1	1	0	2	2	2	4.16667	3.25	5.66667	4.16667	4.5	6.33333	3.77778	5.5	4.85714	3.84615	2.33333	4.33333			0
Male	808	1	60	60	9	3	10	12	0	0	5	5	5	5	5	3	2	4.28571	5	4	4	8	0	1	22	4	1	1	1	4	2	1	2.83333	1.5	2.33333	6.66667	6.75	7	2.33333	6.125	4.28571	4.69231	4.83333	4.66667			1
Male	809	1	90	90		2	0		0	0	5	2	3	4	5	4	5	4	1	4	4	13	0	1	22	4	1	3	3	9	0	1	5.16667	3.5	5.33333	5.33333	6.25	6.5	6.44444	6.375	7				4	82.8829	1
Female	810	1	45	54.9	7	0	5	7	0	0	5	2	5	5	5	5	4	4.42857	4	4	4	13	0	2	21	3	3	3	3	8	1	2	7	4.75	7	4	5.5	7	6.33333	7	7	5	3.83333	4.83333	3	61	0
Male	811	1	85	85	7	0	0	7	0	0	4	4	5	5	5	2	4	4.14286	1	4	2	8	0	1	19	1	1	1	0	2	2	3	4.83333	5.75	3.16667	6.5	7	6.66667	5.22222	6	4.42857	4.76923	4.33333	5	4	80.4805	1
Female	812	1	50	61	6	1	2	7	0	0	2	1	1	1	1	1	3	1.42857	4	5	5	18	0	1	20	3	3	3	2	7	0	0	4.16667	1	2.83333	1	2	2.83333	4.66667	4.25	4.85714	2.76923	1.16667	3.33333	1	1.33333	0
Female	813	1	55	67.1		3	0		0	0	3	2	1	4	3	1	4	2.57143	3	5	5	23	0	2	19	1	1	1	1	3	0	0	4.33333	4	4.5	1.83333	1.25	3.66667	5.55556	3.75	5.71429	3.15385	1.66667	3.33333			0
Female	814	1				1.5	0		0	0	4	2	1	4	3	2	4	2.85714	3	4	4	8	0	2	20	2	2	2	1	5	0	0	5.16667	5.5	5.66667	5	4.25	6.33333	5.88889	6.25	5.42857	3.69231	2.5	4.5	1	5.33333	0
Female	815	1			7	0	0	7	0	0	4	1	1	3	3	4	4	2.85714	1	5	5	8	0	1	22	4	3	4	3	11	0	1	5.5	4.75	4	3.66667	4.75	6.33333	4	5.375	2.14286	4.23077	3.83333	4.33333	2	27.6667	0
Male	817	1	95	95	14	0	0	14	1	1	5	5	5	5	5	4	5	4.85714		5	2	2.5	1	1	20	3	3	5	2	10	0	3	1.16667	1	1.66667	3.83333	4.5	6.66667	2.55556	3.625	3	4.76923	3.16667	4.33333	4	91.2913	1
Female	819	2	50	61	8	4	0	12	0	0	3	2	2	2	4	3	4	2.85714	2	5	5	18	0	1	20	2	1	1	1	4	0	1	2.5	2.25	5.83333	5	4.75	6.16667	3.66667	5.5	4	3.92308	3.66667	4.16667	2	33.3333	0
Male	820	1	75	75	10	3	2	13	0	0	5	4	5	5	5	2	2	4	2	5	5	8	0	1	23	5	1	4	4	12	2	0	5.66667	4	6.66667	7	7	6.83333	6.44444	6.625	6.57143	5	3.83333	5			1
Male	821	1	80	80	10	0	5	10	1	0	5	4	4	5	4	5	4	4.42857	4	5	5	18	0	2	22	4	1	2	2	6	2	3	4.16667	2	3.83333	4	2.5	5.33333	4.44444	4.875	4.28571	3.23077	2.33333	4.5	4	96.0961	1
Female	822	1	55	67.1	7	0	0	7	0	0	4	1	1	1	4	2	5	2.57143	2	5	5	26	0	1	19	2	3	2	1	5	0	0	5.83333	5.25	4.33333	3	3.25	6.66667	4.88889	5.25	3.71429	3.30769	2.33333	4.5	1	13.6667	0
Male	823	1	50	50	10	0	0	10	1	1	4	1	1	2	2	2	2	2	2	4	4	18	0	1	18	1	3	1	1	3	0	3	1.5	1.5	2.5	2.5	6.5	4.66667	1	2.625	1.28571	4.30769	4.66667	3.83333	1	24.6246	1
Male	824	1	70	70		1	5		1	0	4	3	5	5	5	3	5	4.28571	4	4	3	18	0	1	21	3	3	3	1	6	0	2	5.33333	2.5	3.83333	4	4.75	6.33333	3.88889	4.75	4	4.07692	3.66667	4.5	2	38.1381	1
Male	825	1	60	60	6	3	2	9	0	0	4	2	1	4	4	4	3	3.14286	5	5	5	18	0	1	20	2	3	2	2	6	0	2	5.83333	5	4.5	4.66667	4.5	6.33333	3.44444	4.875	5.28571	4.07692	2.66667	4.5	2	28.5285	1
Male	826	1	85	85	12	4	2	16	0	0	5	4	2	5	5	5	1	3.85714	5	4	5	23	0	3	19	2	2	1	2	4	0	0	7	4.25	6	6.66667	6.25	7	4.88889	5.5	5.57143	4.38462	2.66667	4	2	45.6456	1
Male	827	1	65	65	12	4	10	16	0	0	2	2	2	4	5	5	3	3.28571	5	5	5	26	0	2	19	4	1	1	2	4	2	2	5.33333	3.25	2	4	5.25	6	2.33333	5.375	3.71429	3.84615	4	4.16667			1
Female	828	1	52.5	64.05	8	5	0	13	1	0	3	2	3	4	4	4	4	3.42857	2	5	3	8	0	2	19	1	1	1	1	3	2	2	4.5	3.5	3.5	4	3.75	4.5	4.11111	4.125	4.28571	4.30769	4.16667	5	2	44.6667	0
Male	829	1	70	70	8	0	2	8	0	0	5	1	1	4	4	4	4	3.28571	3	4	4	18	0	2	20	2	3	2	1	5	0	0	4.66667	4	5.66667	5.16667	6.5	7	5	6	5	4	3.5	5	2	31.2312	1
Female	830	1	50	61		1	0		1	1	3	4	3	3	4	2	3	3.14286	1	5	5	18	0	1	18	1	1	1	0	2	2	1	6.83333	3.75	5.33333	4	5	6	5.55556	6.125	6.14286	3.53846	3.16667	4	4	84.3333	0
Female	831	1	45	54.9	6	1	2	7	0	0	3	2	1	2	4	3	5	2.85714	2	5	5	13	0	1	19	2	3	1	0	1	0	1	6.83333	4.75	1.16667	3	1.25	5.66667	4.88889	4.875	5.42857	2.15385	1.83333	3.5			0
Female	833	1	50	61	5	4	2	9	0	0	5	2	2	3	4	4	5	3.57143	2	4	3	23	0	2	22	4	3	4	2	9	0	2	6.33333	3	7	3.66667	4.5	5.5	6.33333	5.75	6	3.53846	3.16667	3.5			0
Female	834	2	70	85.4	10	0	0	10	0	0	5	5	4	5	5	5	5	4.85714	1	5	5	13	0	1	22	5	1	2	1	3	2	0	4	3.75	1	1.16667	4.25	6	5.44444	4.5	5.42857	4.30769	3.83333	4.66667	3	51.6667	0
Female	836	1	40	48.8	7	2	2	9	0	0	4	1	1	4	4	4	4	3.14286	5	5	5	23	0	1	20	3	3	3	1	7	0	2	2.83333	1.75	4.33333	3.66667	3.75	4.83333	3.77778	4.25	4.57143	4.07692	3.5	4.66667			0
Female	838	1	51	62.22	13	1	0	14	0	0	2	1	2	2	3	2	3	2.14286	2	5	5	18	0	2	20	3	3	3	3	9	0	1	5.83333	4.75	4.83333	1.83333	1	4.16667	3.88889	3.125	3.14286	2.61538	1.83333	3.66667			0
Male	839	1	65	65	9	0	5	9	0	0	4	1	1	1	4	4	4	2.71429	5	5	5	26	0	2	21	3	3	2	3	7	0	0	5.33333	3.5	6.16667	3	3	3.33333	5.22222	4.125	5.14286	3.30769	2.33333	4.5	2	44.7447	1
Female	840	1	50	61	6	5	2	11	0	0	4	1	1	2	4	4	4	2.85714	1	5	5	18	0	1	19	2	3	2	0	2	0	1	4.83333	2.75	6.16667	1.16667	1	5.66667	5.88889	6.125	6.57143	3.23077	2.16667	5			0
Female	841	1	45	54.9	6	1	0	7	0	0	3	3	3	4	4	3	3	3.28571	3	5	5	18	0	2	19	1	1	1	0	2	3	2	3.33333	3.75	5.66667	3.16667	5	5.83333	3	3.75	2.71429	3.76923	2.83333	4	4	76	0
Female	842	1	70	85.4	9	0	0	9	0	0	1	1	1	1	1	1	1	1	1	5	5	8	0	2	19	1	1	1	0	2	2	2	6.66667	7	4	5.83333	1.75	4.83333	2.88889	4.125	6	2	1.16667	3.83333			0
Male	844	1	75	75	9	1	5	10	0	0	5	2	5	4	4	4	3	3.85714	5	5	5	26	0	2	21	3	2	3	1	5	2	1										4.38462	3.33333	4.66667	3	66.967	1
Male	845	1	85	85	8	0	2	8	1	0	2	2	2	2	2	2	1	1.85714	2	5		26	0	2	22	4	1	4	3	11	1	2															1
Male	846	2	75	75	10	2	5	12	0	0	3	1	1	4	5	5	3	3.14286	4	5	5	13	0	1	21	3	3	3	1	6	0	1	7	3.75	5.33333	3.83333	7	7	5.44444	5.625	3.28571	4.38462	4.33333	4	1	17.1171	1
Female	847	1	37	45.14	9	3	0	12	1	0	5	5	5	5	5	5	4	4.85714	4	5	4	18	0	1	18	1	3	1	0	2	0	2										4.38462	4.16667	5			0
Male	848	1	75	75	9	0	2	9	0	0	1	1	1	3	2	3	1	1.71429	5	4	5	13	0	1	21	4	1	4	3	11	2	2	5.66667	2.25	6	4	7	4.33333	4.33333	5.625	2.71429	4.61538	4.66667	3.66667	4	84.985	1
Male	851	1			7	4	0	11	0	0	4	2	2	4	5	5	5	3.85714	2	5	2	8	0	2	19	2	3	1	0	2	0	1	1.33333	1	2.16667	1	3	5.5	1.55556	2.25	2.28571	3.84615	3.16667	5			1
Male	852	1	90	90	10	0	5	10	0	0	5	3	3	5	5	3	3	3.85714	3	4	4	8	0	2	20	3	1	2	3	7	2	0	5.33333	3.75	3.5	5.16667	6	7	4.55556	5.75	4.71429	4.61538	4.16667	5	3	64.5646	1
Male	853	1	100	100		1	0		0	0	4	2	2	5	5	2	4	3.42857	1	4	3	13	0	1	21	4	1	4	4	12	2	2										4.53846	3.5	4.5	3	67.2673	1
Male	854	1	80	80	10	2	2	12	0	0	4	4	4	4	4	4	5	4.14286	2	4	4	13	0	3	21	3	2	3	2	7	1	1										4.92308	3.83333	5			1
Male	855	1	80	80	9	3	2	12	0	0	4	2	2	5	4	5	4	3.71429	4	4	3	13	0	1	21	4	1	3	3	10	2	1	2.16667	1	1.83333	3.16667	6	6.16667	2.55556	2.875	3.14286	3.92308	2.66667	4			1
Female	857	1	60	73.2	9	1.5	0	10.5	1	0	3	4	3	4	4	4	4	3.71429	1	4	4	23	0	1	19	1	1	1	0	2	0	1	6.5	5	4.33333	5.16667	6.25	7	6.77778	6.625	6.57143				3	62.6667	0
Male	858	1	90	90		2	0		0	0	4	3	3	4	4	2	3	3.28571	1	5		23	0	1	19	1	1	1	0	2	0	2	5	2.25	3.83333	4.83333	5.5	6.5	3.66667	5.875	4.71429	4.53846	3.5	4.33333			1
Female	860	1	65	79.3	8		2	8	0	0	2	1	1	1	4	4	3	2.28571	2	5	4	18	0	1	21	3	1	3	2	8	0	1	3.33333	2.25	3	3.16667	6.5	7	5.22222	5	5.71429	4.53846	3.66667	5	4	80.6667	0
Male	861	1	85	85	11	0	5	11	1	0	3	2	4	4	4	2	3	3.14286	5	4	4	8	0	1	20	3	2	3	1	5	2	1	2.66667	2.25	4.66667	4.83333	5.25	5	4	4.125	5	4.61538	3.5	4.16667			1
Female	862	1	50	61	6.5	1.5	2	8	0	0	5	1	1	1	2	5	4	2.71429	5	5	5	18	0	1	21	3	1	3	2	7	2	1										3.38462	2.66667	4.83333	2	30.3333	0
Female	863	1			9	1	2	10	0	0	4	1	1	3	3	2	5	2.71429	5	5	5	23	0	1	20	2	3	2	1	4	0	1										4.61538	3.66667	5	1	13	0
Female	864	1	55	67.1	7	1	2	8	0	0	2	1	1	3	4	2	3	2.28571	5	5	5	23	0	1	18	1	3	1	0	2	0	1	4.16667	4.5	4.33333	3.5	3.25	6	3.55556	3.125	2.28571	3.69231	2.33333	4.83333			0
Female	865	2	55	67.1		0	0		0	0	1	1	1	1	1	1	2	1.14286	1	5	5	18	0	2	22	4	3	4	3	10	0	3	5	2.5	5.66667	5.16667	3	7	1.22222	7	3.57143	2.76923	2.66667	4.16667	1	24.6667	0
Female	866	1	40	48.8		4	2		0	0	5	3	4	5	5	5	5	4.57143	2	5	5	2.5	0	1	20	2	2	2	2	6	2	2	3.83333	3.25	4.66667	4.16667	5.5	6.5	5	5.75	4.42857	4.76923	4.16667	4.83333			0
Male	867	1	75	75	7		0	7	0	0	4	3	4	5	4	3	4	3.85714	1	5	5	13	0	2	19	1	2	1	0	2	0	2	6.33333	3.5	4.66667	4.33333	5.75	7	4.88889	5.75	5.28571	4.61538	2.83333	5	3	57.3574	1
Male	868	1	65	65	7	1	2	8	0	0	4	1	1	3	2	3	3	2.42857	5	4	4	8	0	1	19	1	3	1	0	1	0	1	5.5	3.25	3.33333	3.33333	5	5.83333	5.11111	4.5	4.14286	3.46154	2.5	4.16667			1
Female	869	1	60	73.2	12	5	2	17	0	0	2	1	1	1	1	1	1	1.14286	1	3	3	2.5	0	1	20	2	1	1	0	3	3	3	3.83333	5.25	3.33333	4.16667	5.5	4.83333	2.88889	3.75	3.57143	3.30769	4.16667	3.83333	4	81	0
Male	870	1	35	35	6	1	2	7	0	0	3	1	1	2	2	2	2	1.85714	4	5	5	13	0	3	19	2	1	1	1	3	0	0	4.33333	2.75	3.16667	2.16667	2.5	4.5	3.11111	3.75	2.14286	3.92308	2.5	4			1
Male	871	1	85	85	10	3	2	13	0	0	4	1	5	1	5	4	2	3.14286	3	2	2	13	0	1	21	3	1	3	2	8	2	1													4	93.3934	1
Male	872	1	85	85	9	0	5	9	0	0	3	1	1	3	2	2	2	2	4	3	3	23	0	1	22	4	1	4	1	8	0	2	3.16667	2	3.5	3.33333	6.75	6.5	3.11111	4.5	2.42857				4	92.1922	1
Female	873	1	70	85.4	9	0	0	9	0	0	2	1	2	2	3	3	2	2.14286	1	5	5	13	0	1	20	2	1	1	1	3	0	1	4.33333	3	4.5	3.5	4.5	4.66667	5.11111	4.875	3.85714	3.84615	3.5	3.5			0
Male	874	2	80	80	10	2	2	12	1	0	4	1	2	4	3	2	3	2.71429	2	5	5	18	0	1	21	3	3	3	2	7	0	2	3.16667	1.5	5.5	4	4.5	6	3.33333	4.25	4.14286	4.07692	3.33333	4.16667	3	57.6577	1
Female	876	2	45	54.9	6	1	2	7	0	0	4	1	1	1	3	2	3	2.14286	3	5	5	23	0	1	19	2	1	2	1	5	0	0	3	2.25	3	1.33333	2.75	3.83333	1.11111	2.625	1.42857	3.46154	2.83333	4	3	66	0
Female	877	1	35	42.7	6	1	2	7	0	0	1	1	1	1	1	1	1	1	1	5	5	18	0	1	20	2	1	2	2	6	2	3	4.33333	2.5	4.83333	2.5	4.5	6.33333	1.22222	3.125	1.42857	4.38462	3.16667	4.16667	3	68	0
Female	878	1	50	61	6	1	2	7	0	0	4	2	2	4	4	5	2	3.28571	4	5	5	26	0	1	20	3	3	3	0	3	0	0										4.84615	4.83333	4.5	1	10	0
Female	880	1	38	46.36	7	2	5	9	0	0	5	3	3	5	4	2	5	3.85714	5	5	4	8	0	1	19	2	2	1	0	2	2	2	5.16667	4.75	5.16667	5	5.5	6.83333	6	6.25	6	4.69231	3.83333	4.83333			0
Female	881	1			6	5	2	11	0	0	4	1	1	1	3	2	4	2.28571	3	5	5	23	0	1	19	2	3	2	2	6	0	2	4.83333	4.5	5.5	3.5	2	5.66667	3.66667	4.625	3.71429	2.84615	2.16667	4.5	1	6	0
Female	883	1	50	61	2	3	2	5	0	0	4	4	5	4	5	2	4	4	4	5	4	13	0	1	19	2	2	2	1	3	0	1										4	2	5	3	67	0
Male	885	1	60	60		0	0		0	0	4	4	4	4	4	2	3	3.57143	1	5	5	13	0	2	19	1	2	1	0	1	2	2	6	5	6.5	6.66667	7	7	5.11111	6.75	6.14286	5	4	5			1
Female	887	2	55	67.1	9	0	2	9	0	0	3	1	1	1	3	4	4	2.42857	4	5	5	26	0	1	19	2	3	2	1	5	0	1	3	1.75	4.16667	1.5	1.25	6.66667	3.77778	4.25	4.57143	2.92308	2.16667	3.83333	3	71.6667	0
Male	888	1	55	55	8	1	2	9	0	0	4	3	1	4	4	2	2	2.85714	2	4	5	8	0	1	19	2	3	2	1	5	0	1	3.16667	1.75	4.66667	3.16667	6.5	6.16667	2.11111	3.5	1.57143	4.30769	3	4.5	1	12.9129	1
Male	889	1	85	85	10	0	2	10	0	0	4	1	4	2	4	4	4	3.28571	2	5	5	18	0	1	20	2	1	1	1	3	0	2	3.83333	3.25	7	6.66667	6.75	7	4.66667	6.75	5.42857	4.53846	4.33333	4.66667	3	70.8709	1
Female	891	1	50	61	7	4	0	11	0	0	4	3	3	4	4	3	4	3.57143	3	5	5	18	0	1	18	1	3	1	1	3	0	2	4.66667	3	5.33333	3.66667	3.5	5.66667	5.66667	6.25	6.28571	3.61538	2	4.83333	1	14	0
Male	892	1	85	85		2	2		0	0	1	1	1	5	1	5	1	2.14286	2	1	5	26	0	1	23	6	2	3	0	3	3	2										4.23077	4	4.66667	3	54.3544	1
Male	893	1	100	100	11	0	2	11	1	1	4	4	4	5	5	1	3	3.71429	1	3	2	2.5	0	1	21	3	2	2	1	4	2	3	2.83333	2.25	2.83333	5.5	7	6.83333	1.44444	4.875	3.42857	5	4.83333	4.83333			1
Female	894	2	77	93.94	9		2	9	0	0	4	1	1	2	4	2	3	2.42857	2	5	5	18	0	3	22	4	1	3	3	9	2	3	5.16667	3.5	1.83333	2.83333	4.5	6.33333	6	3.875	4.14286	3.76923	3	4.83333			0
Male	895	1	70	70	8	0	0	8	0	0	4	2	4	5	5	5	2	3.85714	1	5	5	18	0	1	20	3	3	2	1	5	0	1	5.83333	3.25	6.33333	3.5	7	7	3.11111	6.375	2.57143	5	4.66667	5			1
Male	896	2	90	90	11	0	5	11	1	0	4	5	3	4	4	4	4	4	5	4	3			3	22	6	1	4	4	11	3	3	3.66667	2.5	4.5	3.16667	5	5.83333	2.88889	4.25	3.28571	4.23077	4	4.16667	4	99.6997	1
Male	897	1	95	95	14	12	10	26	1	1	5	5	5	5	5	5	5	5	4	4	3	13	0	1	22	4	3	4	4	12	0	2	5.5	3.5	5.16667	6.5	7	7	5.88889	6.75	6.42857	5	5	5	4	97.8979	1
Male	898	1	50	50	7	3	2	10	0	0	4	2	2	5	4	4	4	3.57143	4	5	5	18	0	2	18	1	1	1	0	1	0	0	2.66667	1.5	3.5	4.16667	6.75	6.5	2.22222	4.125	2.57143	4.46154	3.33333	4.66667			1
Male	899	1	50	50	3	2	2	5	0	0	5	1	1	1	4	3	5	2.85714	5	5	5	18	0	1	18	1	3	1	0	1	0	1	6.33333	3.25	6.33333	6.16667	6.75	7	7	6.25	6.71429	4.23077	1.83333	4.83333	1	0.900901	1
Male	900	1	75	75	8	1	0	9	0	0	5	4	5	5	5	3	5	4.57143	1	4	3	8	0	1	19	1	1	1	0	2	2	2	3.5	2	1.33333	4.5	6.25	5.66667	3	4	3.28571	4.92308	4.33333	5	4	80.7808	1
Male	902	1	85	85	7	1	0	8	0	0	5	5	5	5	5	5	5	5	4	5	5	8	0	1	18	1	1	1	0	2	0	1	5.66667	3	7	6.33333	7	7	6.44444	6.5	7	4.84615	4.16667	5			1
Male	904	1	75	75	10	2	5	12	0	0	5	4	3	5	5	5	4	4.42857	5	4	3	8	0	2	20	3	1	2	2	6	2	2	2.83333	1	2.83333	3.5	6.75	6.83333	2.33333	5	1.28571	4.92308	4.16667	4.83333	2	42.3423	1
Female	905	2	63	76.86	7	0	2	7	0	0	4	2	2	4	4	2	4	3.14286	2	5	5	13	0	2	22	4	1	4	3	11	0	0	4.16667	2.5	5	4.33333	4.25	6	4.44444	5.875	5.14286	4.23077	4	5	3	73.3333	0
Male	906	2	72	72	10	3	0	13	1	0	4	3	3	4	5	4	4	3.85714	1	5	5	13	0	1	20	3	3	3	2	7	0	1	6.16667	4	7	5.66667	4	7	5.33333	6.5	5.28571	4.61538	2.66667	5			1
Female	907	2	40	48.8	6	7	0	13	0	0	4	3	3	4	4	5	5	4	1	5	5	8	0	1	21	3	3	1	1	4	1	0	6.5	5.25	7	5	5.25	6.83333	3.77778	6.25	4.85714	4.38462	3.16667	4.33333	1	3.33333	0
Male	908	2	80	80	12	0	2	12	0	0	4	1	1	3	3	1	3	2.28571	1	5	5	26	0	1	20	2	3	2	0	4	0	0	4.66667	4.5	4.83333	5	5.75	6.66667	4.88889	6.875	5.57143	4.07692	3.5	4.5	3	51.952	1
Female	909	2	77.5	94.55	6	0.5	0	6.5	0	0	4	2	2	5	5	1	5	3.42857	2	4	4	2.5	0	2	21	3	2	3	3	8	2	2	5.33333	3.5	5.83333	3.83333	6	6.16667	4.44444	5	4.42857	4.38462	3.16667	4.66667			0
Female	910	2	50	61	8	0	2	8	0	0	5	3	4	5	5	5	4	4.42857	5	5	5	8	0	1	20	3	3	3	3	9	0	2	4	1	2.33333	1.5	2	6	4.77778	5.5	6.85714	4.53846	2.66667	5			0
Male	911	2	95	95	11	0	2	11	1	0	5	5	5	5	5	4	5	4.85714	2	2	2	2.5	0	1	21	4	3	4	3	10	0	2	1.83333	1	3.33333	3.33333	5.75	7	1.55556	5.625	6.57143	5	5	5	4	77.4775	1
Female	912	2	90	109.8	7	2	2	9	0	0	4	3	2	4	5	2	2	3.14286	2	5	5	18	0	4	22	4	1	3	4	9	2	2	5.5	1.75	5.83333	4.66667	6	7	5.22222	6.75	7	4.61538	3	5	4	84.6667	0
Male	913	2	40	40	6	5	2	11	0	0	5	2	2	5	4	5	5	4	5	5	5	8	0	2	18	1	3	1	1	2	0	1	2	1.5	1	1	5.5	5.83333	1.11111	1.25	1	4.61538	3.33333	5	1	18.018	1
Female	914	2	55	67.1	7	0	0	7	0	0	4	1	1	2	3	2	2	2.14286	1	4	5	13	0	2	22	4	1	4	2	9	1	0	5.66667	3.5	5	4.16667	3.75	6	5.33333	6.25	4.28571	3.76923	3.16667	4.33333	3	66.3333	0
Female	916	2	70	85.4	9	3	2	12	0	0	4	2	2	3	3	2	4	2.85714	4	4	4	8	0	2	22	6	1	5	5	15	3	0										3.84615	3.33333	4			0
Female	917	2	50	61	7	3	2	10	1	0	5	4	4	5	5	5	5	4.71429	5	5	5	8	0	1	18	1	1	1	1	2	0	2										5	5	4.83333	2	40	0
Female	918	2	45	54.9	6	0	2	6	0	0	3	1	1	1	1	3	2	1.71429	2	5	4	13	0	2	21	4	1	4	4	12	0	2	4.66667	4.75	5.66667	4.16667	3	4.66667	4.22222	4.625	5	3.30769	3.83333	3.5			0
Female	923	2	30	36.6	6	2	0	8	0	0	1	1	1	1	3	4	3	2	2	3	4	8	0	1	18	1	3	1	0	1	0	0	4	3.75	1	1.16667	1.75	4.66667	1.55556	2.875	2.28571	2.53846	2.5	3.66667	1	5	0
Female	924	2			6	3	0	9	0	0	5	3	3	4	3	4	3	3.57143	1	5	4	13	0	2	18	1	3	1	0	2	0	1										4.07692	2.66667	4.33333	1	16.6667	0
Female	926	2	70	85.4	10		2	10	0	0	4	4	4	4	3	2	3	3.42857	2		3	8	0	1	22	4	1	3	3	9	3	3	5.33333	5.25	5.66667	4.16667	5.25	6.66667	5.77778	6	5.85714	4.53846	3.33333	4.83333	4	94	0
Male	927	2	70	70	6	3	2	9	0	0	4	3	3	5		3	3		4	5	4	8	0	2	18	1	2	1	0	1	0	2										3.84615	3.33333	4			1
Male	928	2	74	74		2.5	5		1	1	3	1	1	3	2	4	3	2.42857	5	5	5	18	0	1	21	4	3	4	3	11	0	3	3.5	2	4.16667	2.33333	3.5	5	1.66667	2.75	1.14286	4.38462	2.66667	4.5	4	79.5796	1
Male	930	2	78	78	9	0	2	9	0	0	5	1	3	5	4	5	5	4	1	4	5	23	0	1	21	3	3	2	2	6	0	0	6.83333	3.5	5.16667	2.16667	5	6.66667	4.77778	6	5.42857	4.30769	3.5	5	2	42.6426	1
Male	931	2	65	65		0	2		1	0	4	3	3	5	5	1	5	3.71429	3	5	5	13	0	1	21	3	1	3	2	8	0	2															1
Female	932	2	50	61	7	0	5	7	0	0	4	1	2	4	5	2	4	3.14286	5	5	5	13	0	1	21	4	1	3	2	8	2	2	5.66667	4	6	4	4.75	6.33333	5.44444	6.125	5.57143	4.30769	3.16667	5	4	80.3333	0
Male	933	2	85	85	9	0	0	9	0	0	3	1	1	2	4	2	2	2.14286	1	5	5	8	0	1	21	4	1	3	3	7	1	1	2.66667	1	2	4	5.75	6.33333	2.77778	4.5	3.71429	3.84615	3.66667	5	3	69.0691	1
Female	935	2	40	48.8	7	1.5	2	8.5	0	0	4	3	3	4	5	5	5	4.14286	5	5	5	26	0	2	19	2	1	2	0	2	0	0	3.5	1.5	2.33333	2.83333	2.25	5.5	2.44444	3.875	2.14286	4.92308	3.83333	4.66667	1	20.3333	0
Female	936	2	45	54.9		1	0		0	0	4	1	2	3	4	4	4	3.14286	2	4	4	13	0	1	19	1	3	1	0	2	0	1	2.33333	2.25	2.66667	2.33333	2.75	4.83333	3.11111	3.375	3.57143	3.61538	2.66667	3.33333			0
Male	937	2	70	70	9	3	10	12	0	0	4	3	5	5	5	2	3	3.85714	5	5	3	2.5	0	3	22	4	1	4	3	11	1	1										4.84615	4	5			1
Male	938	2	85	85	7	0	0	7	0	0	4	4	3	4	4	5	4	4	1	4	4	13	0	1	19	1	1	1	0	2	0	2	6.16667	3.75	5.83333	5	6.5	6.66667	5.33333	5.5	6.28571				3	57.958	1
Female	940	2	40	48.8	6		2	6	0	0	5	2	2	3	4	2	4	3.14286	2	5	5	13	0	1	18	1	3	1	1	3	0	0	3.33333	1.75	4.66667	3.33333	2.75	5.83333	4.33333	4.125	3.42857	3.53846	2.5	4	1	7.66667	0
Male	941	2	72	72	6	2	2	8	0	0	5	2	3	3	3	4	3	3.28571	4	5	5	18	0	2	22	4	1	3	2	5	0	1	5.66667	3.25	5.66667	4.66667	4.25	5.5	5.22222	4.75	4.28571	3.76923	3.16667	4.66667	1	21.6216	1
Female	942	2	60	73.2	8	2	2	10	0	0	3	2	2	4	3	4	3	3	3	3	3	26	0	1	22	4	1	4	1	7	0	2	3	2.75	1.66667	2.16667	3.75	5	3.55556	4.125	5	3.69231	3.66667	3.83333			0
Female	943	2	55	67.1	7	3	5	10	0	0	2	1	1	1	4	3	2	2	5	3	3	2.5	0	2	22	4	3	4	2	9	0	1	5.83333	6.5	5.66667	4.66667	5	6.66667	4.55556	5.875	4.14286	4.07692	3.83333	5			0
Male	944	2	85	85	9	0	2	9	1	0	5	4	3	5	5	5	5	4.57143	1	5	4	2.5	0	1	20	3	1	3	2	8	2	2	4	4.25	6.33333	6.16667	7	6.66667	4.44444	6.375	5.85714	5	5	5	4	81.0811	1
Male	946	2	75	75	8	2	0	10	0	0	2	1	1	4	5	4	1	2.57143	1	5	5	26	0	1	19	1	1	0	1	1	2	2	4.5	5	2	5	7	5.83333	4.66667	5	4.42857	5	5	5			1
Female	947	2	55	67.1	8	2	5	10	1	0	2	1	1	1	3	1	4	1.85714	4	4	5	18	0	1	20	3	1	2	2	6	2	2										4.92308	3.16667	5	4	81.3333	0
Female	950	2	40	48.8	7	1	5	8	0	0	4	1	1	3	3	2	3	2.42857	5	5	5	8	0	1	20	3	3	3	2	7	0	1	5.5	5.5	6.16667	3.5	3.25	4.66667	4.88889	5	5.28571	3.30769	2	3.83333	1	14.3333	0
Male	952	2	60	60	6	1	0	7	0	0	4	1	1	4	3	1	3	2.42857	1	5	5	13	0	1	19	1	3	1	0	2	0	1	3	1.25	4.16667	2.33333	6.25	6.66667	1.55556	2.75	1.28571	4.46154	4	3.83333	1	6.60661	1
Female	953	2	35	42.7	7	3	2	10	0	0	4	2	1	3	3	4	4	3	3	4	4	8	0	2	19	1	3	1	0	1	0	0	5	6.75	4.16667	3.66667	3	4.83333	3.11111	4.125	1.71429	3.53846	2.83333	3.33333			0
Female	954	2	65	79.3	10	0	2	10	0	0	4	1	4	3	5	2	4	3.28571	2	5	4	8	0	1	19	2	1	2	1	5	2	3	4.83333	3	4.66667	5.16667	5.25	6.16667	3.66667	5.25	4	4.38462	4.16667	4.5	4	94.3333	0
Female	955	2	20	24.4	6	3	0	9	0	0	4	4	4	5	5	5	4	4.42857	4	5	5	13	0	1	19	1	1	1	0	1	3	3										5	4	5	1	6.33333	0
Male	956	2	80	80	10	1	0	11	0	0	3	2	3	3	3	4	2	2.85714	1	4	2	8	0	1	19	2	1	1	0	2	0	1	1.33333	1	1.83333	2.83333	4.5	5.66667	1.77778	2.375	1.42857						1
Male	959	2	120	120	12	0	2	12	1	1	3	1	1	5	2	4	1	2.42857	4	4	4	26	0	1	23	6	3	5	3	11	0	0	1.5	1.25	1	2	3	4	1.33333	3	1.14286	4.53846	3.66667	4.5	4	81.3814	1
Male	960	2	75	75		0	0		0	0	5	5	5	5	5	4	5	4.85714	1	3	2	8	0	1	20	3	3	3	2	7	0	1	4.16667	2.5	3.66667	5.16667	7	6.83333	4.11111	5.5	5.57143	4.84615	4.33333	4.66667	2	34.2342	1
Male	962	2	75	75	9	1	0	10	0	0	4	2	5	5	5	4	3	4	2	5	5	13	0	1	18	1	3	1	1	3	0	2										3.92308	4.16667	4	3	51.3514	1
Male	963	2	60	60	6	1	0	7	0	0	4	4	1	5	5	5	4	4	1	5	5	13	0	1	18	1	3	1	1	3	2	1	6.16667	4.5	5.33333	6.16667	7	7	6.22222	7	6.42857	5	5	5	1	18.6186	1
Male	964	2	100	100	9	2	2	11	0	0	3	1	2	2	5	2	3	2.57143	1	5	5	13	0	2	21	3	2	3	2	8	2	1	3.16667	1.25	3.66667	4.83333	6.5	6.33333	2.88889	3.875	1.85714	4.53846	3.5	4.33333	2	48.9489	1
Female	965	2	50	61	8	0	2	8	0	0	4	1	1	3	4	3	4	2.85714	2	5	5	26	0	1	20	2	3	2	0	4	0	1	3.5	2.25	4.66667	3.83333	5.75	6.66667	2.77778	3.875	1.71429	4.30769	3.66667	5	2	49	0
Female	966	2	55	67.1		0	2		1	0	4	1	1	1	1	1	4	1.85714	2	5	5	13	0	1	21	4	1	3	4	11	2	2													4	82.3333	0
Male	967	2	100	100	12	0	2	12	0	0	4	1	5	5	5	5	3	4	1	5	4	2.5	0	2	22	4	3	2	2	5	0	0										4.69231	5	5	3	56.1562	1
Male	968	2	50	50	6	0	2	6	1	0	3	1	1	3	3	5	3	2.71429	3	4	4	13	0	3	22	4	3	3	2	8	0	0	3.33333	1	6.83333	5	6.75	6.66667	3.44444	5.75	3.28571	4.61538	3.83333	3.83333	1	8.40841	1
Female	969	2	70	85.4	7	0	0	7	0	0	5	3	3	3	5	3	5	3.85714	1	5	5	8	0	1	20	3	1	3	3	9	0	2	4.16667	5.25	2	1.5	2.25	3.33333	5	5.375	5	3.15385	2.16667	3.66667	4	95	0
Male	970	2	55	55	6	1	0	7	0	0	5	2	1	5	5	4	4	3.71429	2	4	4	8	0	1	19	2	3	2	1	5	0	1	4.5	2	5.33333	5.33333	6.25	6.16667	3.33333	5.875	4.57143	4.30769	2.83333	4.83333	1	13.2132	1
Female	971	2	65	79.3	7	0	2	7	0	0	5	5	5	5	5	3	4	4.57143	2	4	3	2.5	0	1	20	3	1	3	2	7	0	1	5	2.25	5	5.66667	5.75	7	3.33333	6.375	6.57143	4.15385	3	5	3	53	0
Male	972	2	30	30	5	3	2	8	0	0	4	2	2	5	5	5	2	3.57143	2	4	5	8	0	1	20	2	1	2	1	3	2	2	3	2.75	4	1.66667	6.25	6.83333	6.33333	4.875	3.85714	3.61538	2	5	1	14.1141	1
Female	973	2	50	61	6	2	8	8	1	0	3	1	1	2	3	2	2	2	5	3	3	2.5	0	1	21	4	1	3	3	9	3	1	5.33333	2.25	7	1.66667	5.75	6.5	5.66667	4.125	5.71429	3.46154	4.33333	3.5			0
Female	975	2	85	103.7	11	0	0	11	0	0	5	1	1	5	5	2	5	3.42857	1	2	2	2.5	0	1	22	4	1	4	3	10	0	1	4.5	4.5	1	2.5	7	7	5.88889	5.125	5.28571	5	5	5	2	45	0
Female	976	2	40	48.8	6	1	2	7	0	0	2	2	1	2	2	2	4	2.14286	2	4	5	23	0	1	19	1	1	1	0	2	0	1	6	3.25	6	5.33333	5.75	6.5	6.44444	5.5	5.85714	3.92308	3.66667	4.33333	3	59.6667	0
Male	977	2	60	60	7	0	2	7	0	0	4	1	1	5	3	4	3	3	1	4	5	13	0	1	21	4	1	3	2	5	0	0	4.16667	2.5	4.83333	5.16667	6.5	6.83333	4.66667	6	3.85714	4.07692	3.33333	5	2	29.1291	1
Female	979	2	50	61	7	0	2	7	0	0	2	2	2	2	3	4	3	2.57143	3	4	4	18	0	1	19	2	1	2	1	5	0	1	4	3.5	4.66667	3.83333	2.5	4.66667	2.66667	4.375	4.14286	3.30769	2.83333	4			0
Male	980	2	80	80	10	2	2	12	0	0	5	2	3	5	5	2	5	3.85714	1	5	5	13	0	1	21	4	1	2	3	8	0	1	5.66667	3.25	3.5	4.66667	7	7	2	5.625	4.42857	4.92308	4.16667	5	2	40.8408	1
Male	981	2	60	60	7	0	0	7	0	0	3	2	2	4	4	3	4	3.14286	3	4	5	13	0	2	19	1	3	1	1	3	0	2	2.66667	1.5	2.33333	2.5	5	6.16667	4.22222	3.875	3	4	3.83333	4			1
Male	985	2	90	90	11	0	2	11	1	1	3	3	5	5	5	3	2	3.71429	2	3	2	2.5	0	1	21	4	1	4	2	9	2	2	7	5	5.5	5.16667	5.75	7	5.44444	6.375	5.85714	4.92308	4.83333	4.83333	4	89.7898	1
Male	986	2	35	35	5	2	0	7	0	0	4	2	2	4	4	5	4	3.57143	3	5	5	23	0	3	19	1	3	1	0	2	0	1										4.30769	2.83333	4.16667			1
Female	987	2	60	73.2	9	0	2	9	0	0	4	3	4	4	4	4	4	3.85714	1	3	4	13	0	1	21	3	1	3	2	8	0	2	4.16667	3.5	3.83333	4.66667	5.25	6.16667	3.11111	4.875	3.28571	4.38462	3.16667	4.33333	4	92	0
Female	988	2	45	54.9	7	2	0	9	0	0	5	2	4	5	4	4	3	3.85714	2	5	5	8	0	1	19	1	1	1	1	3	0	0	4	1.5	4	3.16667	3.5	5.33333	5.33333	4.75	6.71429	3.69231	2.83333	3.83333	1	2.66667	0
Male	990	2	65	65	8	1	2	9	0	0	4	2	2	3	4	4	4	3.28571	4	5	5	18	0	3	20	2	3	2	1	5	0	1	4.16667	3.25	4.33333	4.83333	5.5	5.66667	4.77778	5.125	5.57143	4.23077	4	4	1	5.10511	1
Female	992	2	65	79.3	3	0	0	3	0	0	3	4	5	5	5	3	4	4.14286	2	5	5	23	0	1	18	1	1	1	0	1	2	3	5.66667	5.75	6.66667	5.33333	5	7	5.55556	6.75	6.71429						0
Female	993	2	35	42.7	6	2	2	8	0	0	3	1	1	1	1	2	2	1.57143	4	5	5	13	0	2	21	4	2	3	4	11	0	1										3.23077	3.16667	4.66667			0
Male	994	2	85	85	9	7	10	16	1	1	5	5	5	5	5	2	4	4.42857	4	2	1	2.5	0	2	22	5	1	5	5	15	2	3	3.66667	4	5	4.66667	7	7	1.77778	4.25	4	4.84615	5	5	4	96.997	1
Male	995	2	60	60	7	0	0	7	0	0	5	3	3	4	4	3	5	3.85714	1	2	2	2.5	0	1	20	3	3	3	2	8	0	0													2	31.5315	1
Male	997	2	65	65	7	1	2	8	0	0	3	1		4	2	2	2	2	2	4	4	8	0	1	18	1	1	1	0	2	2	2	3.66667	2	2.66667	4.33333	5.5	6.33333	2.77778	4.375	3.71429	4.69231	4.33333	4.5			1
Male	998	2	75	75	7	1	5	8	0	0	2	2	2	5	3	3	3	2.85714	4	5	5	18	0	1	20	2	3	1	1	3	0	2										4.69231	2.5	3.66667	2	49.2492	1
Male	999	2	70	70	9	1	2	10	0	0	1	1	1	1	4	4	2	2	3	5	5	26	0	1	19	2	3	2	2	5	0	2	4.16667	2.75	4.5	4.5	4.75	6.5	2.66667	4.125	2.14286	3.61538	2.66667	4.33333			1
Male	1000	2	65	65	9	1	5	10	0	0	2	3	4	5	4	4	2	3.42857	5	4	3	2.5	0	2	20	3	1	3	1	6	3	3	4.16667	4.5	3.66667	4.5	6	5.5	3.22222	4.25	3.85714	4.69231	4.83333	4.33333	4	86.7868	1
Female	1001	2	63	76.86	9	2	2	11	0	0	4	4	5	5	4	2	4	4	4	2	2	8	0	1	19	1	1	1	1	2	2	2	5.5	3	3.83333	5.66667	5.25	6.33333	4.22222	6.5	6	3.61538	3.33333	3.83333	4	83	0
Female	1002	2	40	48.8	6	5	2	11	1	0	5	2	2	4	5	5	5	4	1	5	5	26	0	1	22	6	2	4	4	12	2	3	4.5	1.25	6.16667	3	7	7	6.88889	3.875	4.14286	4.84615	3.83333	5			0
Male	1003	2	65	65	6	3	2	9	0	0	5	4	5	4	4	3	4	4.14286	5	5	5	26	0	1	20	2	3	1	0	1	0	2										4.07692	1.66667	4.66667			1
Female	1005	2	50	61	6	0.5	0	6.5	0	0	5	3	3	5	5	3	4	4	2	5	5	23	0	1	19	1	1	1	1	3	0	1	6.33333	5.25	6.16667	6.83333	6.25	7	5.55556	6.5	6.28571	5	4.83333	5			0
Male	1009	2	70	70	9	0	2	9	1	0	5	5	5	5	5	4	5	4.85714	2	3	2	18	0	1	20	1	1	1	0	1	3	1	1.83333	1.25	2.33333	3.66667	5.75	6.66667	3.44444	4	3.28571	4.76923	2.66667	4.16667			1
Male	1011	2				2	2		0	0	4	2	2	3	5	3	4	3.28571	1	5	1	13	0	1	18	1	3	1	0	1	0	1	4.5	3	3.83333	4.33333	5.5	5.33333	4.22222	4.25	2.85714	3.76923	2.83333	4			1
Male	1015	2	65	65	10	3	0	13	0	0	5	2	2	4	4	4	4	3.57143	1	5	5	8	0	1	20	2	3	2	2	6	1	2	5	1	3.16667	2	4.75	6.33333	3.33333	2.75	4	4.92308	4.66667	5			1
Female	1018	2	65	79.3	6	4	2	10	0	0	4	1	2	3	3	2	3	2.57143	5	5	5	13	0	3	20	2	2	1	0	1	0	0	4	2	4	1.5	3.25	4.5	5.33333	4	2.71429	3.61538	2.33333	4.66667	1	8.66667	0
Male	1019	2	85	85	9	2	0	11	1	0	4	2	1	3	2	3	2	2.42857	1	5	5	18	0	3	22	4	3	4	3	11	0	1										4	3.16667	4.33333	3	73.2733	1
Female	1021	2	65	79.3	11	3	5	14	0	0	3	2	2	3	4	2	2	2.57143	3	3	2	2.5	0	1	20	3	1	2	2	6	2	2	3.16667	4.5	5.16667	5.66667	5.75	4.83333	2.44444	3.75	3.28571	4	3.16667	4.16667	4	90.3333	0
Female	1022	2	40	48.8	6	1	5	7	0	0	4	2	1	2	4	2	4	2.71429	4	4	4	8	0	2	21	3	2	3	1	5	2	2	4	1.5	2.5	1.66667	2	4	5	5.25	5.57143	3.69231	3	4	1	19.3333	0
Male	1023	2	70	70	9	2	5	11	0	0	2	4	2	4	3	2	2	2.71429	5	5	5	18	0	1	19	1	1	1	0	1	1	1	4.5	2.25	2	3.5	4.25	6	4	4.125	3.85714	4.23077	3	5			1
Male	1024	2	65	65	1	2	0	3	0	0	5	1	1	2	4	5	3	3	1	4	5	18	0	1	19	2	3	2	2	6	0	0	5.83333	4.25	3.83333	3.33333	2.75	6.33333	6.88889	5.375	5.85714	2.76923	1.83333	4.16667			1
Female	1025	2			6	0	0	6	0	0	3	1	1	1	1	2	2	1.57143	1	5	5	23	0	2	19	2	3	2	1	4	0	2	2.5	2.25	3.33333	1	1.75	3.5	5	4.875	2.14286	2.69231	1.5	4	1	24	0
Male	1026	2	52	52	7	0	0	7	0	0	4	1	2	2	3	2	3	2.42857	1	4	4	18	0	1	21	3	3	3	3	9	0	1										4	2.5	3.66667	1	14.7147	1
Male	1027	2	50	50	7	0	0	7	0	0	2	2	2	2	2	4	2	2.28571	4	4	4	8	0	1	19	1	2	1	0	2	0	0	3.66667	2	5.66667	5.16667	5.75	6	4.66667	5.5	5.14286	3.84615	3.66667	4.16667	1	3.9039	1
Male	1028	2	60	60	8	2	2	10	0	0	5	5	5	5	5	5	1	4.42857	4		2	8	0	1	21	4	1	4	3	11	1	1	5.33333	2.75	6.5	4.66667	7	7	4.33333	5.625	3.85714	5	4.83333	5			1
Male	1029	2	85	85	11	0	0	11	0	0	4	4	4	5	5	5	4	4.42857	2	4	4	8	0	1	20	2	1	2	2	6	2	2										4.53846	3.83333	4.66667	3	74.1742	1
Female	1030	2	40	48.8	6	1	2	7	0	0	1	1	1	1	1	3	1	1.28571	5	5	5	26	0	1	21	4	1	2	2	6	0	1	6.5	5.75	4.5	1.5	1.5	4.83333	4.88889	4.875	1	3.23077	3.5	4.5	3	58.3333	0
Male	1031	2	80	80	9	0	2	9	0	0	5	2	3	4	5	4	5	4	2	5	5	26	0	1	20	2	3	2	0	4	0	2	4.66667	4.25	4.5	3.66667	4.75	6.33333	7	5.875	5.28571	4.30769	2.66667	3.5	3	59.4595	1
Female	1032	2	50	61		0	0		0	0	5	1	1	3		1	4		4	5	5	26	0	1	19	1	1	1	0	2	2	2	6.33333	4.75	7	4.66667	3.25	4.83333	5.44444	6.125	5.28571	3.46154	3.16667	4.16667			0
Male	1033	2	60	60	7	0	0	7	1	0	5	2	3	5	5	5	2	3.85714	1	5	5	23	0	1	21	3	3	3	3	9	0	2	5.5	3.25	4.83333	4	7	7	5.66667	5.75	4.57143	4.69231	3.66667	4.83333	3	63.6637	1
Female	1034	2	50	61	6	2	0	8	0	0	4	2	2	4	4	2	3	3	3	5	5	26	0	1	19	1	1	1	0	1	2	1										4.30769	3.83333	4.33333			0
Male	1035	2	50	50	7	3	0	10	0	0	3	2	2	3	4	4	2	2.85714	2	5	5	8	0	3	19	2	1	1	1	4	0	0	3.5	2	3	3.66667	3	3.5	2.33333	3	2.14286	4	3.33333	4.5			1
Female	1036	2	53	64.66	7	1	2	8	0	0	3	1	1	3	3	4	3	2.57143	1	5	5	13	0	2	19	2	1	2	2	6	0	1	5.16667	1	3.33333	1.16667	5	7	5	4.5	2	4.46154	2.83333	5	1	17	0
Male	1038	2	70	70	10	0	2	10	0	0	1	1	3	1	1	2	3	1.71429	4	5	5	18	0	1	21	3	2	3	2	8	2	3	2.16667	2	1	1	4.75	5.66667	1.66667	3.125	3.42857	4.84615	4.16667	4			1
Female	1039	2	45	54.9	6	0	0	6	0	0	2	2	2	4	4	2	2	2.57143	2	4	4	23	0	1	20	2	1	2	1	5	2	2	3.33333	2.25	4.33333	3.16667	4	6	2.55556	5	4.85714	3.61538	3	4.33333			0
Female	1040	2	70	85.4	9	0	2	9	0	0	4	1	1	1	5	2	2	2.28571	3	5	5	23	0	1	21	3	1	3	2	8	2	2	5.33333	5.75	4.5	2.5	4.75	6.33333	6.33333	3.875	4	4.07692	3.33333	4	4	88.3333	0
Female	1041	2	60	73.2	9	0	2	9	0	0	4	2	4	4	3	2	2	3	4	5	4	23	0	1	20	3	1	3	2	6	2	2	5.16667	5.25	2	6.16667	7	7	2.88889	6	4.57143	4.30769	4.33333	4.83333	4	79	0
Female	1042	2	70	85.4	7	0	0	7	1	1	5	2	4	2	2	2	4	3	1	5	5	23	0	2	20	3	3	3	3	9	0	1										4.23077	3.83333	5	4	90.6667	0
Male	1044	2	85	85	10	3	2	13	1	0	5	5	5	5	5	4	5	4.85714	1	4	4	2.5	0	1	23		1	4	3	11	2	3	2	1	1.5	2.5	2.5	7	6.66667	6	7	4.38462	2.33333	4.5	4	95.4955	1
Male	1045	2	65	65	8	0	2	8	1	0	1	1	1	4	1	1	4	1.85714	2	5	4	13	0	1	18	1	1	0	0	0	0	3	5	3	4.33333	3.5	4.75	4.33333	4.33333	4.5	4.85714	4.07692	4	4.16667			1
Male	1046	2	60	60	8	0	2	8	0	0	3	1	1	2	4	4	4	2.71429	4	4	4	18	0	1	20	2	3	1	1	3	0	0	3.66667	4	3	2.16667	4	6.33333	4.33333	5.125	4.85714	4	3.16667	4.16667	2	41.4414	1
Male	1047	2			6	3	0	9	1	0	4	2	2	2	4	4	3	3	2	4	4	23	0	2	18	1	1	1	1	3	1	2										4	3.33333	4	1	23.7237	1
Female	1049	2	45	54.9	10	2.5	0	12.5	1	1	4	4	4	4	4	3	4	3.85714	3	3	3	2.5	1	3	24	5	3	4	3	10	0	3	5.33333	1.5	4.83333	4.83333	4	5.83333	2.77778	6.125	5	4.15385	3	4.5			0
Female	1050	2	60	73.2	8	2	2	10	0	0	2	1	1	1	1	4	2	1.71429	5	5	5	26	0	1	20	2	1	1	0	2	0	1	7	7	4.5	3.5	4.5	6.66667	7	6.5	7	4.23077	3.16667	4.83333			0
Female	1051	2	65	79.3	12	4	2	16	0	0	4	1	1	1	1	4	5	2.42857	5	4	4	18	0	1	19	2	1	1	0	2	2	2	6.33333	5.75	6.66667	6.5	6.5	6.66667	5.66667	6.625	6.28571	4.07692	4.16667	4.16667	2	46.3333	0
Female	1052	2	50	61	7	0	2	7	0	0	4	1	1	2	2	2	4	2.28571	3	5	5	26	0	1	21	3	3	3	2	8	0	3	3.16667	1	2.16667	1	2	3.5	4.22222	4.125	1	3.84615	2.66667	4.83333	3	55	0
Female	1053	2	45	54.9	6	5.5	0	11.5	1	0	4	4	3	3	3	3	3	3.28571	2	3	3	18	0	1	19	1	2	1	1	3	2	2	5.83333	1.5	6.16667	2.83333	4.75	6.33333	7	5.75	6.14286	4.15385	3.5	4.66667	3	56.3333	0
Male	1054	2	75	75	9	1	2	10	0	0	5	2	3	4	4	4	4	3.71429	2	5	5	18	0	1	18	1	1	1	1	2	1	1	1.83333	1	1.66667	1.66667	1.75	6.5	1.33333	1.125	1.85714	4.38462	3.5	4.83333			1
Female	1055	2	72.5	88.45		0	0		0	0	2	1	1	1	4	1	3	1.85714	2	5	5	18	0	2	20	2	1	2	1	5	2	2	4	6.5	2.66667	4.16667	6.5	6	4.44444	5.25	2.28571				3	68.6667	0
Male	1058	2	52.5	52.5	6	0	5	6	0	0	4	2	2	2	4	3	3	2.85714	4	4	5	23	0	1	20	3	3	3	3	9	0	0	2.66667	1.75	2.33333	1.33333	5.25	6.16667	4.88889	4.125	4.57143	4	3.66667	4.16667	1	7.50751	1
Male	1060	2	95	95	9	2	10	11	0	0	4	1	1	5	1	5	1	2.57143	5	5	1	23	0	2	22	6	2	4	3	10	2	2	3.33333	4	1.33333	4.16667	5	5.83333	4.22222	3.25	2.28571				2	36.036	1
Female	1061	2	65	79.3	7	2	5	9	0		1	1	1	2	4	5	3	2.42857	5	5	5		0	1	19	2	1	2	1	3	0	2	4.16667	7	2.83333	5	4	6.83333	3.66667	6.625	6.14286	3.84615	2.83333	4.66667	2	46.6667	0
Male	1062	2	75	75	11	1	0	12	0	0	4	3	3	4	4	4	4	3.71429	2	5	5	23	0	1	20	3	1	2	2	6	0	1	2.16667	1.5	3.5	5.33333	5.5	6.83333	4	4.875	4.28571	4.46154	4	4.66667	3	69.3694	1
Male	1063	2	55	55	6	0	2	6		0	5	1	1	5	5	3	5	3.57143	2	5	5	13	0	1	19	1	3	1	1	3	0	1	3.33333	2.25	5.5	3.33333	6.5	7	3.44444	4.875	2	4.61538	4.66667	4.83333	1	24.024	1
Male	1064	2	80	80	10	0	5	10	0	0	2	1	1	4	3	3	2	2.28571	5	5	5	23	0	1	22	4	3	3	3	6	0	1													1	9.90991	1
Female	1066	2	65	79.3	6	3	2	9	0	0	4	3	4	3	3	4	4	3.57143	2	5	4	8	0	4	21	3	1	3	2	8	2	2										4.30769	3.5	5			0
Female	1067	2	55	67.1	6	2	0	8	0	0	2	1	1	1	1	1	1	1.14286	2	5	5	13	0	1	18	1	1	1	1	3	1	2	6.16667	5.25	5	4.83333	5	6.5	6.88889	6.625	5.85714	3.92308	4	3.66667			0
Female	1068	2	43	52.46		0	0		0	0	3	1	1	2	2	2	4	2.14286	2	4	4	26	0	2	18	1	1	1	1	3	1	2	3.83333	3.75	4.5	3.66667	3.75	4.66667	4.33333	4.375	5	3.84615	3	4			0
Male	1069	2	80	80	10	2	8	12	0	0	5	4	4	4	4	4	4	4.14286	5	5	5	13	0	1	21	3	1	2	2	6	0	3										4.38462	4.16667	5			1
Male	1070	2	60	60	2	4	0	6	1	1	3	3	4	4	4	3	4	3.57143	1	4	4	2.5	0	1	19	1	3	1	1	3	0	0	5	3.5	5.33333	5.33333	6	6.5	4.11111	6	5	4.07692	3.16667	5	2	38.4384	1
Male	1071	2				2	0		0	0	5	3	3	4	4	4	4	3.85714	1	5	5	26	0	1	18	1	3	1	0	2	0	2	6.33333	5	6	5.5	6.5	6.66667	5.44444	6.75	6.28571	4.84615	3.83333	4.5			1
Female	1072	2	50	61	6	1	0	7	0	0	5	2	1	4	4	4	4	3.42857	4	5	5	8	0	1	19	2	3	1	0	1	0	0	4.66667	5.25	4.83333	3.5	5	5.5	3.33333	4.125	3.14286	3.46154	3	4			0
Female	1073	2	40	48.8	6	2	2	8	1	0	4	1	1	2	3	2	3	2.28571	2	4	4	2.5	0	1	21	4	3	4	4	12	0	2	2	1.25	2.66667	2.5	5	6.33333	2.11111	2.75	1.14286	3.61538	3	4.33333			0
Male	1074	2	70	70	7	0	2	7	0	0	3	4	5	5	5	4	3	4.14286	4	4	4	18	0	1	19	1	1	1	1	3	0	1	2.16667	2	3.33333	6	5.25	7	4.66667	4.75	5	4.84615	4.16667	4.83333			1
Female	1075	2	50	61	7	2.5	2	9.5	0	0	2	2	2	3	3	2	5	2.71429	3	5	5	23	0	1	18	1	1	1	0	2	0	2	3.66667	2.5	3	3.5	5.5	6	3.11111	4.125	4.42857	4.07692	3	4			0
Female	1076	2	40	48.8	9	0	2	9	1	0	3	1	1	1	4	4	3	2.42857	4	3	3	8	0	1	20	2	1	2	1	5	3	3	6	5.25	5	5.66667	6.5	6.33333	6.33333	5.875	4.57143	4	4.5	3.66667	3	63.3333	0
Female	1077	2	41	50.02		1	2		0	0	4	1	1	2	4	4	2	2.57143	5	5	5	18	0	1	18	1	3	1	1	3	0	1	4.83333	4.5	5.66667	3	2.5	5.16667	5.22222	4.25	4	3.69231	3	4	1	10.3333	0
Male	1078	5	45	45	6	2	2	8	0	0	2	1	2	2	2	3	2	2	2	5	5	13	0	1	21	3	3	3	3	8	0	0	2.83333	1.5	2.66667	1.16667	1.75	4.66667	3.22222	2.625	1.85714	3	2.66667	3.83333			1
Male	1079	2	55	55	7	1	2	8	0	0	5	1	1	1	3	4	4	2.71429	2	5	5	18	0	1	19	2	3	1	2	5	0	0	4.83333	1	4	3.16667	4.5	6.66667	5.55556	5.5	5.71429	2.76923	1.83333	3.16667			1
Male	1080	2	95	95	10	0	2	10	0	0	3	3	3	5	5	4	1	3.42857	2	1	1	2.5	0	1	21	3	1	3	3	9	0	2	2.66667	2.25	3.66667	4.33333	4.75	4.66667	3.77778	6	4.42857	5	5	3.83333	3	58.2583	1
Male	1081	2	20	20	5	0	8	5			5	4	4	5	5	5			5	4	4	8	0	1	19	1	1	1	0	1	0	2										4.53846	3.33333	4.33333			1
Female	1082	2			7	3	2	10	0	0	1	1	1	3	1	2	2	1.57143	5	3	2	2.5	0	1	18	1	1	0	0	0	0	0	4.5	4.5	3	2.5	3	5.66667	6.55556	5.5	4.71429	3.30769	2.16667	3.66667			0
Male	1083	2	50	50	6	1	10	7	0	0	3	3	4	5	5	5	3	4	5	3	2	13	0	2	20	2	1	1	1	3	0	2	2.5	2.75	3	6.83333	6.75	5.33333	4.22222	5.25	4.85714						1
Male	1085	2	60	60	7		2	7	1	0	3	1	1	4	3	5	2	2.71429	2	5	5	26	0	1	20	2	3	2	1	5	0	0	3.5	1.5	4	3.5	6	6.66667	3.22222	4.125	2	4.30769	4	4.33333	2	26.4264	1
Female	1086	2			7	0	2	7	0	0	4	1	1	4	4	3	5	3.14286	2	4	3	13	0	1	20	3	1	3	1	7	0	2	4	4.25	4.33333	6.83333	5.5	6.66667	3.22222	6.625	5.71429	3.69231	3.5	4.33333	4	87.3333	0
Female	1087	2	40	48.8	6	1	2	7	0	0	4	4	4	4	4	3	3	3.71429	2	4	4	13	0	2	19	2	2	2	1	5	2	1	2.5	1.75	3.33333	2.5	3.75	5.16667	3.33333	5.25	3.57143	4	3.33333	4	1	9	0
Female	1088	2	45	54.9	6	5	10	11	0	0	5	3	3	5	5	5	5	4.42857	5	5	5	8	0	1	19	1	3	1	1	3	1	2	7	7	6.66667	7	7	7	5.66667	6.875	6.57143						0
Female	1089	2	80	97.6	13	7	2	20	1	0	4	3	2	4	5	1	2	3	2		4	23	0	1	20	3	1	2	3	8	2	3	3.5	2	2	3.83333	5.5	6.33333	4	5.625	4.57143	4.23077	4.5	4.33333	4	84	0
Male	1090	2	37.5	37.5	7		0	7	0	0	5	4	5	5	4	3	4	4.28571	4	4	4	8	0	1	19	1	3	1	0	2	0	2	2.16667	1.75	3.83333	6.66667	6	5.16667	2.77778	5.125	4.28571	4.30769	3.83333	3.83333			1
Female	1091	2	35	42.7		3	2		0	0	3	2	1	4	4	5	2	3	4	4	4	13	0	1	18	1	3	1	0	2	0	2	4.83333	5	3.83333	5	4	5.83333	4.11111	4.875	3	4.23077	3.16667	4	1	2	0
Female	1092	2	50	61	7	1	2	8	0	0	3	1	1	1	3	4	4	2.42857	3	5	5	18	0	1	20	2	3	2	0	2	0	1	5.66667	4	4.5	3.66667	3.25	5	6.66667	4.125	5.57143	3.30769	3	3.83333			0
Female	1093	2			11	2	0	13	0	0	4	2	1	1	5	5	3	3	5	4	2	2.5	0	1	18	1	3	1	1	3	0	1	6	1.25	4.83333	2.66667	6	7	6	6.5	6				1	13.3333	0
Male	1094	2	115	115	11	0	10	11	0	0	4	4	5	5		5	5		5	3	2	8	0	1	22	5	1	4	3	9	2	1	5	2.5	4.5	2	6.25	6.66667	6.33333	6.125	6.42857	3.84615	2.83333	3.66667	4	78.0781	1
Female	1095	2	60	73.2	9	1	2	10	0	0	4	1	1	2	5	4	2	2.71429	4	5	5	26	0	1	19	1	1	1	0	1	1	1	4.16667	1	4.83333	3.16667	7	7	3.44444	5.5	4.85714	4.76923	4	5	4	86	0
Female	1096	2	38	46.36	6	0	0	6	1	0	2	1	1	1	3	2	2	1.71429	1	5	5	13	0	1	19	2	3	1	0	1	0	2	3.66667	1.5	6.33333	6.16667	3.75	4.5	3.33333	5.625	4	3.46154	2.83333	4.16667	1	4.33333	0
Male	1097	2	90	90	10	0	2	10	0	0	2	1	1	4	4	3	1	2.28571	2	4	3	8	0	1	21	3	1	3	1	6	0	1	1.16667	1	4.16667	2.33333	4.75	4.66667	2.55556	3.875	2.28571	4.23077	4.16667	3.16667	4	76.5766	1
Male	1098	2	80	80	6	8	2	14	0	0	3	3	3	5	4	2	2	3.14286	2	5	5	18	0	2	18	1	2	0	0	0	2	2	3.16667	1	3.83333	2.33333	5.75	6.5	1.55556	3.625	1.14286	5	4.5	5			1
Male	1099	2	60	60	7	3	0	10	0	0	5	3	3	5	5	5	5	4.42857	5	4	4	8	0	1	20	2	3	2	1	4	0	2	4.33333	3.75	6.16667	5.83333	5.75	6.83333	3.33333	5.5	5.71429	3.92308	2.66667	5			1
Female	1100	2	80	97.6		1	10		0	0	3	3	3	3	5	5	3	3.57143	5	3	3	2.5	0	3	18	1	1	0	0	0	0	2	7	7	5.83333	7	7	7	7	7	7	5	5	5			0
Male	1101	2	80	80		0	5		0	0	5	4	4	5	4	2	4	4	4	1	1	13	0	1	22	5	1	4	1	7	2	2	4.5	2.5	1	2.16667	6.25	7	3.22222	4.625	3	4.69231	3.5	4.66667	4	99.0991	1
Female	1102	2	90	109.8	10	0	2	10	1	1	4	4	5	5	5	5	5	4.71429	2	5	5	18	0	1	23	5	1	4	3	11	3	3	4.83333	3.5	7	5.16667	6.75	7	5	6	6.14286	4.92308	4.66667	4.66667	4	98.6667	0
Female	1103	2	50	61	7	0	0	7	0	0	5	1	1	1	4	2	4	2.57143	1	5	5	26	0	1	22	4	3	2	3	8	0	0	5.5	6	1.66667	3.83333	4.75	6.16667	6.66667	6.125	5.85714	3.92308	2.33333	4	1	9.33333	0
Female	1104	2	49	59.78	7	2	2	9	0	0	2	1	1	1	1	2	2	1.42857	2	5	5	18	0	1	22	4	2	4	1	6	0	0	2.83333	2.25	3.33333	1.5	3.75	5.83333	2.88889	3.25	3.14286	4.61538	3	4.66667	1	17.6667	0
Male	1105	2	80	80	10	0	0	10	0	0	5	3	4	4	4	5	5	4.28571	5	5	5	23	0	2	19	2	1	2	0	2	0	0	4.16667	3.25	5	5.5	5	5.83333	5	5.75	5.28571	4.38462	3.16667	4.33333	4	83.1832	1
Female	1106	2	45	54.9	7	1	2	8	0	0	5	1	1	2	4	3	3	2.71429	1	5	5	18	0	1	18	1	3	1	1	3	0	1	7	4.5	6	5.5	5.5	6.33333	5.88889	6.125	5.28571	4.61538	3.33333	5	2	49.3333	0
Male	1107	2	65	65	7	0	2	7	0	0	4	3	3	5	4	4	2	3.57143	4	5	5	8	0	2	20	2	1	1	2	5	0	1	6	4.75	6.83333	5.16667	6.25	6.66667	3.88889	3.875	4.42857	4.07692	3.16667	4.5	3	68.1682	1
Female	1108	2	60	73.2	10	3	2	13	0	0	4	1	1	3	3	2	2	2.28571	2	5	5	18	0	1	21	4	2	4	3	11	2	2	3	1	2.5	1.33333	4	5.83333	2.88889	2.5	1.28571	4.46154	3.5	4.83333	3	52	0
Male	1109	2	60	60	6	3	0	9	0	0	4	2	1	3	2	2	3	2.42857	1	4	4	8	0	3	21	3	3	3	3	8	0	1	4.33333	2.75	3.66667	3.66667	4.25	4.83333	3.33333	3.875	3.71429	3	3	3	1	19.5195	1
Male	1110	2	105	105		6	0		0	0	5	5	4	5	4	3	5	4.42857		5	5	13	0	3	21	3	1	3	2	8	1	3	1.16667	1.5	2.5	2.66667	4.75	5	2.11111	4.125	2.28571						1
Male	1111	2	75	75	10	0	2	10	0	0	4	2	2	5	4	5	3	3.57143	2	5	5	8	0	1	20	3	1	3	2	7	2	1	2.33333	2	6.66667	3.5	4.25	6.16667	4.66667	5.125	6.42857	4.38462	3.83333	4	4	86.4865	1
Female	1112	2	55	67.1	10	0	2	10	0	0	2	1	1	1	1	4	1	1.57143	1	3	2	8	0	2	22	4	2	4	4	12	2	2	3.33333	2.25	6	3.83333	2.5	4.66667	5	5	3.14286	2.76923	3.33333	4.5	3	57.3333	0
Male	1113	2	50	50	7	0	0	7	0	0	3	1	1	5	3	3	3	2.71429	1	5	5	23	0	1	18	1	3	1	0	2	0	2	4.16667	1.25	5.66667	2.16667	6.75	6.5	1.66667	4.125	3	5	3.83333	3.66667			1
Female	1114	2	50	61		0	10		1	0	1	1	1	1	2	1	1	1.14286	5	5	5	18	0	2	18	1	3	1	0	2	0	2										3	2	4.5			0
Male	1115	2	70	70	8	0	0	8	0	0	3	3	3	5	5	4	3	3.71429	2	4	4	8	0	1	19	1	1	0	0	0	0	2										4.92308	4.83333	4.5			1
Male	1116	2	60	60	7	2	0	9	0	0	3	1	1	3	2	3	2	2.14286	1	5	5	13	0	1	19	1	1	1	0	2	0	1	4.5	2	3.33333	4.66667	4.5	4.33333	3.77778	4.75	4.57143	4.30769	3.33333	4.33333			1
Female	1118	2	57.5	70.15		1	0		0	0	4	1	1	4	3	3	5	3	2	4	5	23	0	3	20	3	3	3	3	9	0	1	5.16667	5.75	5.66667	3.66667	5.5	6.33333	4.11111	5.875	3.14286	4.46154	3.66667	4.83333	3	53.3333	0
Female	1119	2	53	64.66	8	0	2	8	0	0	5	1	1	1	1	3	3	2.14286	2	5	5	23	0	1	21	3	2	3	2	8	0	0										3.46154	3	4	2	43.3333	0
Female	1120	2			7	2.5	0	9.5	0	0	4	1	1	3	3	5	1	2.57143	1	5	5	8	0	1	21	3	1	1	3	7	2	2															0
Male	1121	2	120	120	8	0	2	8	0	0	4	4	2	5	5	2	4	3.71429	2	4	4	8	0	1	20	3	1	3	2	6	0	0	2.5	1.25	4.16667	4.66667	6	6.83333	3.44444	5	4.14286	4.84615	4.66667	5	4	98.1982	1
Female	1123	2	35	42.7	7	0	0	7	1	0	3	3	3	5	4	4	4	3.71429	2	4	4	8	0	1	20	3	1	3	3	9	2	2	4.5	3.5	4.33333	3.66667	5.75	6.33333	3.44444	5	5	4.15385	3.33333	4.66667			0
Female	1124	2	65	79.3		0	5		0	0	4	2	4	4	5	3	4	3.71429	4	5	5	13	0	2	21	3	2	3	1	6	2	2	4.16667	2.75	4.5	3.33333	5.25	6	2.55556	4	2.85714	4.23077	2	4.16667			0
Male	1125	2	75	75	8	0	2	8	0	0	4	1	1	5	4	4	3	3.14286	4	4	4	18	0	1	19	2	1	1	1	2	0	1	4.5	2.5	5.5	4.66667	6	6	3.66667	4.875	4.28571	5	5	5			1
Female	1127	2	50	61	7	1	2	8	0	0	2	1	1	1	3	2	3	1.85714	3	5	5	23	0	1	22	4	3	4	3	10	0	1	4.33333	4	5.16667	5.16667	3.75	5.33333	5	5.125	4.71429	3.46154	2.66667	4	1	18.3333	0
Male	1128	2	60	60	7	1	2	8	0	0	3	1	1	4	5	4	2	2.85714	3	5	5	26	0	2	19	2	3	1	1	4	0	2	6.5	5.25	6	3.83333	6.5	7	4.55556	4.5	4.71429	4.84615	3.83333	4.66667	2	34.5345	1
Female	1131	2	52.5	64.05	10.5	0	2	10.5	0	0	5	2	4	3	4	5	5	4	5	4	4	13	0	2	20	2	1	2	0	3	2	3	5.33333	3.75	3.33333	4.16667	5.75	7	5.88889	5.5	4.71429	4.23077	3.16667	4.83333	4	81.6667	0
Male	1132	2	85	85	12	0	2	12	0	0	4	2	3	4	4	3	3	3.28571	3	4	3	18	0		21	3	3	3	2	7	0	2	3.5	3.75	1.83333	2.83333	5.75	6.5	4.22222	3.875	1.85714	4.38462	4	4.83333	2	49.8498	1
Female	1133	2	55	67.1	8	0	5	8	0	0	2	1	2	1	2	1	3	1.71429	5	5	5	8	0	1	21	4	1	4	3	10	3	3	5.66667	3.5	4	3.16667	5.5	6.5	2.22222	3.875	3	3.92308	4	4.66667	4	77	0
Male	1135	2	50	50		2	0		0	0	3	1	1	4	2	3	1	2.14286	1	5	5	18	0	1	18	1	1	1	0	2	2	1	3	1.25	4.5	4	6.5	6.33333	3.11111	5.125	3.57143	4.38462	4.33333	5			1
Female	1136	2	62.5	76.25	11	0	2	11	0	0	4	3	2	2	4	4	5	3.42857	2	4	4	13	0	3	21	4	3	1	3	8	0	0	5.83333	4.25	4.66667	5	6.25	6.33333	5.33333	5.875	4.42857	4.23077	4.33333	4.33333	2	38	0
Male	1137	2	75	75	10	5	5	15	0	0	4	1	2	5	5	5	4	3.71429	5	5	5	23	0	1	21	3	1	1	0	2	2	3	4.33333	3.5	5.66667	4.33333	6.75	7	4.44444	5	4	4.61538	3.83333	4.83333	4	85.8859	1
Male	1138	2	47.5	47.5		2	2		0	0	5	3	3	5	5	2	3	3.71429	4	5	5	8	0	2	19	1	3	1	1	3	0	2	6.5	6.5	5.5	5.33333	5.75	6	5.44444	6	5.42857	4.30769	4.16667	4			1
Female	1140	2	50	61	6	0	0	6	1	1	3	1	1	2	2	3	3	2.14286	1	4	5	18	0	1	21	4	1	3	2	6	3	1	4.33333	2.5	4.83333	2.5	1.75	4.16667	2.44444	3	2.28571	3.38462	2.66667	3.5	3	54.6667	0
Female	1141	2	10	12.2	6	1	0	7	0	0	3	4	4	4	4	2	4	3.57143	2	5	5	13	0	2	22	4	1	1	4	9	3	3	3.33333	2.5	4.83333	4.66667	6.25	6.5	3.77778	5.75	5.42857	5	5	5			0
Female	1142	2	40	48.8	7	1	2	8	1	1	2	2	2	5		5	5		5	5	4	18	0	1	20	3	1	2	0	2	0	2	4.33333	7	3	1.83333	3	3.16667	7	6.25	5.14286						0
Female	1143	2	50	61	6	1	2	7	0	0	5	2	2	4	4	2	4	3.28571	4	4	5	18	0	2	22	4	3	3	2	9	0	1										3.69231	2.5	4.5			0
Female	1144	2	25	30.5	5	1	0	6	0	0	5	1	1	1	1	5	4	2.57143	5	5	5	2.5	0	3	21	3	1	2	0	2	2	2	6.16667	7	4.66667	6.33333	7	7	4.77778	6.375	1.85714	4.38462	3.66667	4.66667			0
Male	1145	2	55	55	6	3	0	9	0	0	4	3	3	4	5	2	4	3.57143	2	4	2	2.5	0	1	19	1	3	1	1	3	0	3	5.16667	1.25	5.16667	3	5.75	6.83333	4.22222	4.75	3.57143	4.23077	4.33333	4.5			1
Female	1146	2	65	79.3	7	0	0	7	1	0	5	5	5	5	5	4	5	4.85714	2		4	2.5	0	1	22	4	1	3	3	9	3	2	5.5	4.25	6.16667	6.16667	6	7	4.11111	6.625	6	4.84615	2.5	5	4	97	0
Male	1147	2	75	75	9	2	0	11	1	0	5	3	1	5	5	4	5	4	1	4	3	2.5	0	2	19	2	3	2	2	6	0	2	5	3.5	5.16667	4.33333	6	6.83333	5.55556	6.25	4.57143	5	3.16667	4.83333	1	24.9249	1
Male	1148	2	75	75	7	0	5	7	0	0	4	1	1	1	1	3	3	2	4	5	5	26	0	1	22	4	3	4	4	12	0	0	5.33333	3.75	6.66667	5	4	6	4.77778	6.5	4.14286	4	3.16667	4.16667	1	8.70871	1
Female	1150	2	45	54.9	7	0	0	7	0	0	3	2	2	2	4	3	2	2.57143	2	5	5	13	0	2	19	2	1	2	1	5	2	2	4	2.25	4.83333	4.33333	5	6.5	4.22222	4.25	5	4.07692	3.5	4.66667			0
Female	1151	2	50	61	8	1.5	10	9.5	1	0	4	2	2	4	4	3	5	3.42857	4	2	3	2.5	0	2	20	2	1	1	2	5	2	2															0
Female	1152	2	55	67.1	6	1	0	7	0	0	3	2	3	3	3	3	5	3.14286	2	5	5	23	0	1	20	3	3	2	2	6	0	0	7	2	6.33333	5.33333	3.75	7	5.77778	6.375	5.28571	4.23077	1.5	5			0
Female	1153	2	60	73.2		0.5	2		0	0	5	2	1	1	4	4	4	3	2	4	5	8	0	1	19	1	2	1	1	3	0	1	6.66667	4.5	6	5.66667	5.25	7	6.44444	6.75	6.71429	4.07692	2.33333	5	1	21.6667	0
Female	1154	2	85	103.7	12	0	2	12	1	1	4	3	4	4	4	3	3	3.57143	3	5	4	8	0	1	21	3	2	3	1	7	2	0	3.16667	4	2.66667	4.16667	6.5	6.66667	1.66667	4.75	3				4	93.3333	0
Female	1156	2	35	42.7	6	0	2	6	0	0	2	1	1	1	3	2	4	2	2	5	4	13	0	1	21	3	1	3	3	9	0	3	4.33333	1.75	4.33333	2.33333	6	7	5.44444	6.125	2	4.69231	4.33333	5			0
Female	1157	2	40	48.8	6	2	0	8	0	0	5	2	3	4	4	3	4	3.57143	1	5	3	18	0	2	22	4	2	4	3	11	0	0	6.83333	4.25	4.33333	3	4.75	7	5.44444	5	5.42857	4.15385	3.33333	4.33333			0
Female	1158	2	75	91.5	9	0	5	9	0	0	4	1	1	1	4	2	2	2.14286	1	5	5	23	0	1	21	4	1	4	4	12	0	1	4.5	2.25	5.5	4.83333	4.5	7	3.55556	6.75	6.42857	4.53846	2	3.5			0
Male	1159	2	45	45	9	1	0	10	0	0	5	4	5	5	5	3	5	4.57143	1	5	4	8	0	1	21	1	1	1	0	2	3	3	3.5	3	4.33333	4.16667	6.5	6.83333	3.33333	5.375	4.42857	4.92308	4.66667	5	4	91.8919	1
Female	1160	2	50	61	6	2	5	8	0	0	4	1	1	2	1	2	2	1.85714	4	5	5	26	0	4	22	4	2	4	2	8	2	3	1.5	1.25	4.66667	2.33333	5.5	6	5.22222	4.25	2.85714	4.61538	3.66667	5			0
Male	1162	2	86	86	7.5	0	2	7.5	1	0	4	2	3	5	5	5	4	4	2	5	5	23	0	2	21	3	3	3	3	9	0	2	5.33333	3.75	6.16667	6	6.5	6.83333	5	6	6.14286	4.84615	3.83333	4.66667			1
Male	1163	2	70	70	6	4	2	10	0	0	2	1	2	5	1	5	1	2.42857	2	5	3	26	0	1	22	5	3	4	2	7	0	0	2	1	1.16667	1.83333	7	3.83333	4	2.625	2.85714	4.84615	4.83333	4.83333	1	7.20721	1
Male	1164	2	70	70	10.5		0	10.5			4	4	4	5	5	5	5	4.57143	2	5	5	18	0	1	19	1	2	0	0	0	0	2										5	4	5			1
Male	1165	2			2	2	0	4	0	0	3	1	1	1	5	5	1	2.42857	5		2	2.5	0	1	18	1	3	1	0	1	0	2	6	2.5	6	6	7	7	6.33333	7	6.14286	4.84615	3	5	1	3.3033	1
Male	1166	2	80	80	9	0	2	9	0	0	4	2	4	5	5	5	4	4.14286	2	5	5	23	0	2	21	3	2	3	1	7	2	1	7	3.25	4.5	2	4.75	6.83333	4.55556	5.75	4.71429	4.46154	3.33333	4.5	2	47.7477	1
Male	1169	2	70	70	7	1.5	2	8.5	0	0	5	3	2	3	4	4	3	3.42857	4	5	5	8	0	1	19	1	2	1	0	2	0	1	5.16667	3.75	4.16667	5.66667	7	7	5.66667	6.625	5.71429	5	5	5			1
Male	1170	2	40	40	6	0	2	6	0	0	2	1	1	1	3		2		4	4	4	8	0	1	20	3	3	2	3	7	0	2	3.66667	3.75	5	2.66667	1.75	4	5	3.75	4.28571	2.23077	2	2.5			1
Male	1171	2	80	80	9	0	2	9	0	0	5	1	1	5	5	3	5	3.57143	4	5	5	8	0	2	22	5	2	3	2	8	0	0										4.53846	4.16667	4.5	3	74.7748	1
Male	1173	2	40	40		2	2		0	0	5	5	5	5	5	4	5	4.85714	1	5	5	13	0	2	19	1	2	1	1	3	0	2	4.5	1.5	3.83333	6	5.5	5.33333	2.66667	5.5	6.42857	5	3.83333	5			1
Male	1175	2	70	70	9	0	2	9	1	0	4	4	4	5	5	3	4	4.14286	2	5	5	8	0	3	20	2	1	1	1	4	3	2	4.83333	3.5	3.83333	4.5	5.5	6	2.66667	4	3.28571	4.38462	3.66667	3.16667	4	97.5976	1
Female	1176	2	50	61	6	0	0	6	0	0	1	1	1	2	4	1	4	2	1	5	5	18	0	1	19	2	3	2	2	6	0	3	4.16667	2.25	5.66667	3	5.25	5.33333	4.55556	5	4.42857				2	33.6667	0
Male	1177	2	85	85	10	0	2	10	0	0	3	2	4	4	3	4	3	3.28571	2	4	2	8	0	2	20	2	1	2	2	5	0	2	3.66667	2.5	3.66667	3.66667	6.25	7	5.33333	5.875	5	4	3.33333	4.66667	3	73.5736	1
Male	1178	2	80	80	7	0	2	7	1	0	3	2	2	1	4	3	2	2.42857	3	5	5	18	0	1	20	2	1	2	2	6	0	3	3	1	5.16667	5	6.75	6.5	4.22222	5.375	3.85714	5	4.16667	5			1
Female	1180	2	55	67.1	6	0	10	6	0	0	5	5	5	5	5	4	4	4.71429	5	5	5	13	0	1	20	2	1	1	0	2	0	1	6.16667	4	5.83333	5.33333	5.75	6.5	5.44444	6.5	6.57143	4.53846	3.66667	4.5			0
Female	1181	2	35	42.7	6	3	2	9	0	0	3	1	1	1	2	3	2	1.85714	2	4	4	8	0	2	20	3	3	3	3	9	0	1	4.83333	3.5	6	3	3.75	5.83333	5.22222	4.75	4	3.69231	2.66667	3.83333	1	22.3333	0
Male	1183	2	75	75	9	0	0	9	0	0	4	4	5	5	4	2	3	3.85714	1	4	3	2.5	0	1	19	2	1	2	1	5	0	1	1.66667	2.25	3	7	4.75	5.5	1.11111	4	4.14286	5	4.66667	5			1
Male	1184	2	90	90	9	0	0	9	0	0	5	2	4	4	5	5	3	4	2	4	4	18	0	1	20	2	3	2	2	6	0	2	2.33333	1.75	4	2.83333	4.25	5.66667	3.44444	3.25	3	4.30769	3	4.16667	2	29.7297	1
Female	1185	2	45	54.9	6	1	0	7	1	0	5	1	1	1	5	4	2	2.71429	3	4	4	23	0	1	20	2	3	2	1	5	0	3	3.83333	2.75	6.5	4.66667	4	6	4.11111	5.125	5.57143	4.15385	3.33333	4.5			0
Female	1186	2				2	2		0	0	5	2	2	4	4	4	2	3.28571	3	5	4	18	0	1	22	4	1	2	4	9	2	2	5	4.75	5.16667	2.83333	3.5	5.5	3.66667	4.625	2.85714	4.15385	3	4	3	69	0
Female	1188	2			6	1	2	7	0	0	3	2	2	2	2	1	3	2.14286	2	5	5	13	0	1	20	2	1	0	1	3	0	0	5.5	2.75	5.66667	4.33333	5.25	6	1.88889	3.375	1.85714	3.61538	3.16667	4			0
Female	1189	2	65	79.3	7	1.5	0	8.5	0	0	4	1	2	1	4	2	3	2.42857	2	4	4	18	0	1	23	5	1	5	4	14	2	1	5	4.25	5.5	4.66667	5.75	6.83333	4.88889	6.5	6.14286						0
Male	1190	2	20	20	2	1	2	3	0	0	4	2	2	2	3	4	4	3	4	5	5	26	0	3	20	2	3	2	0	3	0	0	5.33333	5.25	4.66667	5.16667	4.5	4.83333	5.22222	5	4.57143	3.69231	2.33333	4			1
Female	1191	2	25	30.5	6		0	6	0	0	3	1	1	1	3	4	3	2.28571	2	5	5	13	0	1	18	1	1	1	0	1	0	1										3.30769	2.83333	4.33333			0
Male	1192	2	85	85	12	0	0	12	0	0	5	3	3	4	5	4	4	4	1	5	5	18	0	1	19	2	1	1	1	3	0	0	4.16667	3.25	4.5	3.66667	5.25	6	4.55556	4.25	3	4.15385	3.16667	4.33333	3	53.4535	1
Male	1193	2	80	80	9	0	0	9	1	0	3	2	2	3	3	4	4	3	2	5	5	13	0	1	20	3	1	3	2	8	2	3													4	90.0901	1
Male	1194	2	85	85	10	0	5	10	0	0	5	2	1	2	5	5	2	3.14286	4	5	5	26	0	1	21	3	1	3	2	8	0	1										4.46154	3.16667	3.66667	3	63.3634	1
Male	1195	2	65	65	10	2	10	12	0	0	4	1	1	5	3	1	1	2.28571	3	5	5	13	0	1	21	3	3	3	1	6	0	1										4.61538	2.16667	4.66667			1
Female	1198	2	50	61	7	1	0	8	1	0	3	1	1	1	2	2	2	1.71429	2	4	4	8	0	1	19	1	3	1	0	2	0	1	4.33333	2.5	5.83333	2.66667	4	5	5.22222	4.75	3.57143	3.69231	2.83333	4	2	29.3333	0
Female	1199	3	50	61	7		2	7	0	0	3	2	2	3	3	2	4	2.71429	2	5	5	23	0	2	21	3	1	3	2	8	0	3	6.16667	5.5	6.16667	5.83333	3.75	6.66667	6	6.25	6	4.38462	4.16667	4.33333			0
Male	1200	2	60	60	7	0	0	7	0	0	3	3	3	4	3	1	2	2.71429	1	4	4	8	0	1	19	1	3	1	1	3	0	2	3.83333	3.25	4.33333	3.83333	5	4.33333	4	4.25	4.28571	3.38462	3.16667	3.33333			1
Male	1201	2	70	70	6	1	2	7	0	0	3	1	1	2	2	2	2	1.85714	3	4	4	2.5	0	1	21	3	3	3	2	8	0	2	4.5	3.5	5.66667	2.33333	5.25	5.66667	4	4.25	2.57143	4.92308	4.16667	4.83333	1	20.7207	1
Male	1202	2	50	50	5	0	2	5	0	0	2	1	1	1	2	4	3	2	2	2	3	8	0	1	21	4	3	2	0	2	0	1	7	7	2.5	2.16667	6	5.83333	2.44444	2.625	1	3.53846	4.83333	3.16667	1	2.4024	1
Female	1203	2	80	97.6	9	0	2	9	0	0	5	4	4	5	5	2	5	4.28571	2	5	5	8		1	22	4	1	4	2	10		3	5.83333	3.5	4.83333	5	6.25	6.66667	5.11111	5.875	4.85714	4.38462	3.33333	4.33333	4	98	0
Female	1204	2	50	61	9	0	0	9	0	0	5	2	3	4	4	3	3	3.42857	1	4	4	23	0	1	21	4	3	4	3	10	0	2	5.66667	4.75	6	5.66667	4.75	6.5	5.66667	5.125	6	4.53846	4	4	3	52.6667	0
Female	1205	2	35	42.7	7	3	2	10	0	0	1	1	1	1	1	3	2	1.42857	4	5	5	23	0	1	23	5	1	3	4	7	3	3	5.16667	4	3.83333	4.66667	4.75	6.33333	1.77778	4.125	1	3.07692	3.66667	3.83333	2	42	0
Male	1206	2	55	55	7	0	2	7	0	0	3	1	1	3	3	1	2	2	1	5	5	18	0	1	18	1	3	1	0	2	0	0	5.5	4.75	4.33333	3.33333	5.5	6.33333	2.22222	4.125	2.42857	4.30769	3	4.33333			1
Male	1207	2	60	60	7	1	2	8	0	0	2	1	1	2	3	2	4	2.14286	3		5	13	0	1	18	1	3	1	1	3	0	1	3.33333	1.75	5.83333	3.33333	4.75	6.33333	1.77778	4	2.57143	4	2.83333	4			1
Female	1208	2	65	79.3	10	3	0	13	1	0	4	2	2	5	5	2	2	3.14286	1	5	5	18	0	2	22	4	1	4	3	11	2	2	6.33333	5.25	5.83333	5.5	6.75	6.66667	6.44444	6.125	6	5	4.66667	5			0
Female	1209	2	60	73.2	8	0	2	8	0	0	4	1	1	4	3	5	4	3.14286	3	5	5	23	0	1	21	3	3	3	2	8	0	1	4.66667	4	4.83333	4	5.75	6.83333	3.55556	4.375	2.71429	4	3.33333	4.5	3	56	0
Female	1211	2	40	48.8	10	2	0	12	0	0	2	3	3	2	3	2	3	2.57143	1	5	4	26	0	1	18	1	1	1	1	3	0	3	3.5	4.5	4.83333	2.5	2.75	5	5.11111	4.5	3.57143	3.46154	3.16667	3.5			0
Male	1214	2	65	65	8	2	2	10	1	0	3	1	1	4	4	4	2	2.71429	3	4	5	8	0	1	18	1	1	1	0	1	0	1										4.84615	3.83333	4.16667	2	36.3363	1
Female	1216	2	35	42.7	6	0	2	6	0	0	4	1	1	1	4	3	3	2.42857	5	2	5	8	0	1	21	4	3	2	2	6	0	0	3.83333	2.5	4.33333	1	3.5	6.66667	5	4.75	2	3	2.83333	4.5			0
Female	1217	2	42	51.24	6	0	0	6	0	0	4	1	1	2	2	2	3	2.14286	2	4	4	13	0	2	19	1	1	1	1	3	2	0	5.16667	4.25	5	5	4.75	5.5	3.66667	5.5	4.42857	3.69231	3.83333	3.66667			0
Female	1218	2	75	91.5	10	2	0	12	1	1	4	3	3	4	3	2	4	3.28571	2	5	4	8	0	1	22	4	2	3	3	6	2	2	4.16667	2.75	4.5	2.83333	4.75	6.66667	3.66667	3.5	2.28571	4.07692	2.66667	4.16667	4	77.3333	0
Female	1220	2	45	54.9	6	2	5	8	0	0	3	2	2	4	4	2	2	2.71429	4	5	5	13	0	1	18	2	2	1	1	2	2	2	5.66667	3.25	4.5	3.83333	4.25	5.33333	3.66667	4.5	4.14286	4.46154	3.83333	4.83333			0
Male	1221	2	67.5	67.5			0		0	0	4	3	3	4	5	5	1	3.57143	3	4	4	23	0	2	19	2	3	2	1	5	0	2	5.5	3.75	6	5.33333	5.75	6.33333	5.66667	6.625	6	4.15385	3.83333	4.16667			1
Male	1222	2	75	75	6	2	0	8	0	0	4	2	1	3	4	3	2	2.71429	2	4	3	8	0	2	22	4	1	4	4	12	0	0	4.66667	2.25	5	3.83333	5	6	5.44444	5.125	4.57143	4.53846	3.83333	4.66667	1	17.4174	1
Female	1223	2			6	2	2	8	0	0	4	4	5	5	4	2	4	4	1	4	3	18	0	1	19	1	1	0	0	1	3	3	3.5	2	2.16667	3	4.25	5.83333	2.22222	4.5	2.71429	4.07692	3.66667	4			0
Female	1224	2	40	48.8	7	1	2	8	0	0	5	2	1	5	5	5	4	3.85714	4	4	5	8	0	1	18	1	3	1	0	2	0	2	5.33333	4	7	6.66667	6.5	7	4.66667	6.5	7	4	2.83333	5			0
Female	1225	2	40	48.8	7	4	5	11	0	0	3	1	1	1	1	1	2	1.42857	4	4	4	26	0	2	21	4	3	1	2	3	0	0	5.33333	6	5.5	4.83333	4.75	5.33333	5.33333	5.125	5.42857	3.69231	3.5	4	1	1.66667	0
Female	1227	2	90	109.8	6	1	2	7	1	0	4	1	1	1	1	2	2	1.71429	3	4	4	23	0	2	21	4	3	4	2	9	0	0	4.5	3.5	5.16667	3.83333	5	6.33333	4.11111	5.125	5	3.92308	3	3.66667			0
Male	1229	3	85	85	8	0	2	8	0	0	2	1	2	3	4	3	2	2.42857	2	2	2	8	0	1	20	2	1	2	1	5	0	1	3	1	3	5.16667	5.5	6.33333	2.22222	4.375	3	4.69231	4.66667	4.16667			1
Male	1230	3	95	95	12	4	2	16	0	0	5	3	4	5	5	5	4	4.42857	5	5	3	23	0	1	20	3	3	1	1	3	0	3										4.61538	3.66667	5	4	78.979	1
Female	1232	3	55	67.1	8	2	5	10	0	0	3	3	4	4	5	4	2	3.57143	5	5	5	18	0	1	19	2	1	1	0	3	3	3										3.84615	4.83333	4.16667			0
Female	1233	3	57	69.54	6	3	0	9	1	0	4	3	3	3	3	2	4	3.14286	1	5	5	13	0	1	20	2	3	2	2	6	0	2	4.33333	5	3.66667	4.66667	4	6.5	4.11111	5.75	5.14286	3.46154	2.66667	4.5	2	49.6667	0
Male	1234	3	70	70	9	1	2	10	0	0	5	5	5	5	5	4	4	4.71429	4	4	3	8	0	1	18	1	1	1	0	2	2	1	5.16667	4.5	5	4.83333	7	6.83333	6	5.125	5.28571	4.38462	4.16667	4.66667	2	29.4294	1
Male	1235	3	80	80	10	3	0	13	0	0	4	3	3	5	5	3	4	3.85714	1	4	3	13	0	1	20	3	1	2	1	5	0	0	2.33333	1	2.66667	2.33333	3	4.83333	1.22222	3.25	3.57143	4.15385	3.83333	3.83333	4	77.7778	1
Female	1236	3	45	54.9	7	0	0	7	0	0	3	1	1	1	4	3	2	2.14286	1	5	5	23	0	1	18	1	3	1	1	3	0	0													1	10.6667	0
Male	1237	3	50	50	7	0	0	7	0	0	3	3	3	5	4	4	4	3.71429	3	4	4	8	0	2	19	1	1	1	0	2	1	2	3.5	3	3.33333	4.66667	6.5	7	3.11111	5.75	4.57143	5	4.83333	5			1
Female	1238	3	73	89.06	11	0	2	11	0	0	4	3	3	5	4	3	4	3.71429	2	5	5	13	0	2	21	4	1	4	3	11	0	1	6.33333	5	5.83333	5	6.5	6.83333	6.22222	6.25	5.85714	4.76923	3.5	5	3	73.6667	0
Female	1239	3	55	67.1		1	5		0	0	5	2	2	4	4	4	5	3.71429	5	4	4	8	0	2	23	6	1	4	4	13	0	1	6.5	7	5.66667	6.5	6.25	6.83333	4.44444	6.75	5.85714	4.84615	4.5	5	3	72.3333	0
Male	1241	3	75	75		3	0		0	1	4	1	1	1	3	2	2	2	1	5	5	8	0	1	23	4	1	4	3	11	0	1										4.76923	4.83333	4.83333			1
Female	1242	3	30	36.6	6	1	0	7	0	0	4	1	2	4	4	4	3	3.14286	2	4	4	13	0	1	20	2	1	2	2	6	0	2	4	3.75	4	2.5	3.75	5.83333	2.44444	3.875	2.14286	3.76923	2.83333	4.16667			0
Male	1243	3	40	40	6	0	2	6	0	0	2	1	2	4	3	3	2	2.42857	2	5	5	23	0	2	22	4	3	3	3	9	0	2	3.66667	2.75	3.66667	4.5	6.5	6.83333	3.33333	4	2.14286	4.30769	3.66667	4.83333			1
Female	1244	3	60	73.2	7	0	2	7	0	0	4	2	2	4	3	2	3	2.85714	2	4	4	8	0	4	19	2	1	2	1	5	0	2	4.66667	3.75	4.33333	3.16667	5.5	6.16667	3.55556	4.75	3.85714	4	3.33333	4.5	4	85.3333	0
Male	1246	3	50	50	7	0	2	7	0	0	2	1	1	2	3	3	3	2.14286	2	4	2	18	0	1	18	1	3	1	1	3	0	2	3.5	3.25	4.66667	3.16667	4.75	5.83333	4.55556	4.25	2.28571	4.30769	3	4	1	12.3123	1
Male	1247	3	70	70	7	2	0	9	0	0	3	2	2	4	4	4	4	3.28571	2	3	2	13	0	1	23	5	3	4	3	11	1	2	5.33333	4	4.5	5.16667	5.75	6.16667	3.66667	5.25	4.14286						1
Female	1248	3	55	67.1	6	1	0	7	0	0	4	1	1	3	3	2	2	2.28571	2	5	4	18	0	1	20	2	3	2	1	5	0	0	3	1.75	3.83333	1.83333	2	6.66667	4.44444	3.75	4.14286						0
Male	1250	3	55	55	6	0	0	6	0	0	5	1	1	4	3	3	3	2.85714	2	5	5	26	0	2	18	1	3	1	0	2	0	1	5.5	4.75	5.16667	5.66667	4.5	6.16667	6.33333	5.875	5.14286	4.69231	3.5	3.16667			1
Female	1251	3	48	58.56	7	0	2	7	0	0	3	4	5	5	5	5	5	4.57143	1	5	5	18	0	1	19	2	1	2	2	6	0	3	6.5	3.25	6.66667	6.33333	7	6.83333	5.66667	6.25	6.57143				4	87.6667	0
Female	1253	3				2	0		1	0	4	3	2	3	3	4	2	3	1	4	4	13	0	2	18	1	3	1	1	3	0	3													2	34	0
Female	1254	3	65	79.3	8	1	2	9	0	0	4	1	1	2	2	2	2	2	5	5	5	23	0	1	22	4	1	3	2	8	0	1	5.83333	4.25	3.16667	4.5	5	5.66667	6.66667	6.125	6.42857	2.92308	3	4	4	94.6667	0
Female	1255	3	45	54.9	6	1	10	7	0	0	4	3	4	3	3	1	3	3	5	5	5	13	0	1	20	2	1	0	1	1	0	2	5	3	3.66667	3.5	5.75	6.66667	2.88889	5.25	3.85714				3	69.6667	0
Female	1256	3	35	42.7	8	1	5	9	0	0	3	1	2	3	4	5	4	3.14286	5	4	4	18	0	1	19	1	1	1	0	1	2	2	5.33333	6.5	3	4.5	5	5.33333	6.11111	5.125	3.85714	3.69231	3.5	4	3	51	0
Female	1257	3	70	85.4	10	1	2	11	1	0	5	5	5	5	5	3	5	4.71429	1	5	5	18	0	3	21	2	1	2	1	5	3	0	6.33333	4.75	5.33333	6.16667	6.25	7	6.11111	6.625	6.85714	4.92308	4.16667	4.66667			0
Female	1258	3	50	61	8	3	0	11	0	1	5	4	5	5	5	4	5	4.71429	3	5	5	13	0	2	19	1	2	1	1	3	2	2	6.33333	6.25	5.5	4.83333	7	7	4.33333	6.25	5.85714	4.84615	4.16667	4.83333	3	74.3333	0
Male	1260	3	3	3			0		1	0	3	2	3	4	4	5	4	3.57143	2	5	5	26	0	2	18	1	3	4	0	4	0	1										4.15385	3.66667	5			1
Male	1261	3	45	45		0	0			0	4	4	4	5	5	4	4	4.28571	1	4	3	8	0	1	20	2	1	2	1	5	2	3	6.5	6.5	6.66667	5.83333	7	7	6.22222	6.5	6	4.92308	4.33333	5			1
Female	1262	3	45	54.9		1	2		0	0	2	2	3	3	3	1	3	2.42857	3	5	5	8	0	2	19	2	1	1	2	5	2	3	3	1.25	3.16667	3	2.75	4.83333	3.33333	4	1.85714	3.38462	2.16667	4.33333			0
Female	1263	3	40	48.8	6	1	2	7	0	0	4	1	1	2	3	1	2	2	3	5	5	8	0	1	20	3	3	3	1	7	0	2	3.66667	1.75	5.83333	4	5.5	5.83333	2.22222	4.125	2.14286	3.92308	1.83333	4.33333			0
Female	1264	3	50	61	8	1	5	9	0	0	2	1	1	1	2	2	2	1.57143	5	5	5	13	0	1	22	4	1	4	3	10	0	1	3.83333	2.75	3	1.33333	2.75	5.16667	3	3.5	3.85714	3.30769	2.66667	4.33333			0
Male	1266	3	100	100	11	0	8	11	0	0	4	3	3	5	5	2	4	3.71429	5	5	5	13	0	1	23	6	2	4	2	8	0	1	6.16667	4.25	6.5	4	6.75	7	3.88889	4.75	3.14286	4.92308	4.16667	5			1
Male	1267	3	70	70	10	1	2	11	0	0	3	1	1	3	3	5	2	2.57143	3	3	3	18	0	1	21	4	3	4	4	12	0	0	1.83333	2	3.83333	3.16667	5.5	6.66667	4.77778	6.375	3.71429	3.53846	3	4	2	38.7387	1
Female	1268	3	80	97.6	8		0	8	0	0	4	4	4	4	4	2	4	3.71429	2	5	4	8	0	1	21	4	1	3	3	9	0	0	3.83333	2.25	3.66667	4.33333	5.25	6.66667	3.77778	6.25	5.85714	4.84615	4.33333	4.83333			0
Male	1269	3	105	105	12	0	2	12	0	0	5	5	5	5	5	3	4	4.57143	2	4	4	2.5	0	1	21	4	2	4	3	10	2	1	5.5	3.5	5.5	5.33333	7	5.83333	3.88889	5	3.85714	5	4.16667	5	3	65.7658	1
Female	1270	3	57	69.54	6	6	2	12	0	0	3	1	1	1	5	3	3	2.42857	5	5	4	13	0	1	20	3	3	3	2	7	0	1	4.66667	7	4.66667	5.5	5.75	7	6	7	6.28571	3.76923	1.66667	5	2	34.6667	0
Male	1271	3	55	55	9	0.5	2	9.5	0	0	4	3	4	5	5	2	3	3.71429	3	4	3	2.5	0	1	19	1	1	1	1	3	2	2	5	2.5	5.16667	4.16667	6.5	6.83333	3.77778	4.375	4.28571	4.76923	3	5			1
Female	1272	3	60	73.2	8	3	2	11	0	0	4	1	2	4	3	2	2	2.57143	4	5	5	18	0	2	20	2	2	2	1	3	2	2	5	4.75	5.83333	3.83333	5	5.66667	3.44444	5.25	5.14286	4	3.5	4	2	41.3333	0
Female	1273	3	70	85.4	10	0	2	10	0	0	5	3	5	5	5	3	4	4.28571	1	5	4	18	0	1	21	3	1	2	2	7	0	0	6.5	5	3.66667	3.33333	6.25	7	2.66667	6.875	4.42857	4.61538	4.33333	4.66667	4	89	0
Male	1274	3	65	65	11	3	2	14	0	0	2	2	2	5	4	1	1	2.42857	5	5	3	8	0	2	22	4	1	4	4	12	2	1	5.83333	2.25	2.5	3.83333	6.75	6.66667	3	3.25	1.85714	5	4.33333	4	1	22.5225	1
Male	1275	3	65	65	10	2.5	10	12.5	0	0	2	2	2	4	3	3	2	2.57143	5	5	5	18	0	2	22	5	1	5	5	15	2	1	2.66667	1.25	1.83333	4.33333	6.25	5.5	1	2.875	1	4.92308	4.83333	4.83333			1
Male	1276	3	85	85	9	0	5	9	0	0	3	3	4	5	4	4	3	3.71429	4	3	3	8	0	2	23	5	1	5	5	15	2	2	4	2.5	3.83333	5.16667	7	6.16667	3.11111	5.5	3.57143	4.53846	4.5	3.66667			1
Female	1278	3				2	0		1		5	3	3	3	5	5	3	3.85714	1	5	5	8	0	3	19	1	3	1	0	2	0	2										4.15385	2.83333	5			0
Female	1279	3	38	46.36	7	2	0	9	0	0	5	2	2	4	4	4	5	3.71429	1	4	5	23	0	2	18	1	3	1	0	1	0	2	6.16667	3.75	5	5.16667	6.5	7	6.77778	6.125	6.14286	4.84615	3.83333	5			0
Female	1280	3	36	43.92	12	2	2	14	0	0	5	2	2	5	4	4	3	3.57143	3	5	5	13	0	1	18	1	3	1	0	2	0	1	6.5	6.25	6.33333	5.33333	6.25	7	6.77778	6.25	6.28571	4.76923	4.16667	5	1	3.66667	0
Female	1281	3					2					2	3	3	3	2	3	2.28571	2		4	8	0	1	18	1	1	0	0	0	0	1	3.83333	3.25	5.16667	4.5	5	5.16667	3.88889	5	3.57143	3.53846	3.16667	4.16667			0
Female	1282	3			6	1	2	7	0	0	4	2	3	3	3	4	3	3.14286	2	4	4	13	0	2	18	1	1	1	0	2	0	0	4.5	1.75	4.66667	4.5	4.5	5.66667	4.88889	4.75	4.71429	3.84615	2.5	3.5			0
Male	1283	3	70	70		3	2		1	1	5	3	3	2	2	4	5	3.42857	4	5	5	13	0	1	22	4	3	4	4	12	0	2	5.33333	3.5	2	6.5	6.75	6.83333	6	6.5	5.57143				4	79.2793	1
Female	1284	3	50	61	6	1	5	7	1	0	5	1	1	4	5	5	5	3.71429	5	5	5	13	0	1	21	3	3	3	3	9	0	2										4.84615	4.5	4.83333			0
Female	1286	3	50	61	6		2	6	0	0	4	2	1	1	1	3	3	2.14286	3	5	5	13	0	3	20	3	2	1	2	5	0	0	5.33333	4	3.5	3	2.75	6.33333	6.33333	5.875	5				1	11	0
Male	1288	3	35	35	1.5	0	5	1.5	0	0	4	1	2	2	3	2	2	2.28571	1	2	2	2.5	0	2	22	4	1	4	3	10	2	3	4.5	4.5	3.66667	4.83333	7	6.5	4.77778	4.75	4.71429	4	3.5	3.16667	2	32.7327	1
Female	1289	3	55	67.1	8		0	8	0	0	2	2	2	2	3	4	3	2.57143	2	5	5	23	0	2	21	4	2	4	3	11	2	2	1.5	1.25	2.33333	1	3.5	5.66667	1.88889	2.75	1	4.07692	2.5	4.33333	2	47	0
Female	1290	3	40	48.8	7	0.5	0	7.5	1	0	4	4	4	5	5	3	5	4.28571	1	5	5	26	0	1	21	4	2	1	1	4	2	0	2.83333	1.5	2.16667	1.5	5.25	6.33333	2.44444	3.25	1.57143	4.92308	4.66667	5	4	78.6667	0
Male	1291	3	50	50	9	0	2	9	0	0	5	2	2	5	5	4	2	3.57143	2	4	5	18	0	1	20	3	3	3	3	9	1	2	2.33333	1.75	3.83333	4.5	4.25	6.33333	2.44444	5.375	4.14286	3.92308	3.66667	4.66667			1
Female	1292	3	45	54.9	6	2	2	8	0	0	5	3	4	4	5	3	4	4	4	5	5	18	0	3	19	1	1	1	0	2	2	2	7	6.5	6.5	6.16667	5	7	6.77778	6.75	5.85714	4.23077	3.83333	4.83333			0
Female	1293	3	50	61	6	1	5	7	0	0	4	3	2	3	4	4	3	3.28571	1	3	4	8	0	1	22	4	2	4	3	10	0	1	7	7	4.16667	4.5	4.75	4.66667	5.66667	6.75	3.85714	3.84615	4.5	3.83333			0
Male	1294	3			10	0.5	2	10.5	0	0	5	3	4	5	4	5	2	4	2	4	3	8	0	2	21	4	2	3	1	4	0	1	2.66667	1.25	2.5	2	4.25	5.66667	1.22222	2	1.85714	4.46154	3.33333	4.16667	3	65.1652	1
Female	1295	3	60	73.2	10	3	5	13	1	0	4	3	4	5	5	2	1	3.42857	4	5	5	8	0	2	21	3	1	3	3	8	3	3	6	3.25	5.16667	6	6.5	6.83333	3.88889	5.75	5	3.61538	4.16667	4.83333	4	76.6667	0
Male	1296	3	95	95	13	1	2	14	0	0	3	3	4	4	4	3	4	3.57143	3	5	4	13	0	1	21	4	3	4	3	9	0	2	2.83333	1.25	1.5	1.66667	3	4.66667	4	3.75	3.42857	4.38462	3.16667	4.16667	2	45.9459	1
Male	1297	3	87	87	9	0	2	9	0	0	2	1	4	5	5	5	2	3.42857	5	5	5	23	0	1	19	1	1	1	0	1	2	2	4.5	2.5	4	3.16667	5.25	6.16667	5	5.375	5.57143	4.46154	4.5	2.83333			1
Female	1298	3	60	73.2	7	0	2	7	1	0	5	2	1	3	3	2	2	2.57143	3	5	5	8	0	5	22	4	2	4	4	12	2	2	5.83333	3.5	4.5	4.16667	6	6.66667	5.66667	6.75	6	3.92308	3.83333	4.5	3	57	0
Female	1299	3	67.5	82.35	7	1	0	8	1	0	3	1	1	4	4	3	4	2.85714	4	5	5	26	0	1	24	2	2	2	0	3	1	0	5	1.75	3.33333	1	2.25	5.33333	5.66667	4.875	3.14286	2.84615	3	4.5	3	73	0
Female	1300	3	75	91.5	13	4	2	17	0	0	4	3	4	4	4	2	3	3.42857	3	5	5	13	0	1	18	1	1	1	1	3	0	0	4.5	5.5	5.16667	5.66667	6.75	6.83333	5.55556	6.75	5.85714	4.38462	4.16667	4.33333			0
Female	1301	3	55	67.1	7	2	5	9	0	0	3	1	1	3	3	2	1	2	5	5	4	8	0	1	21	4	1	4	3	11	2	2	4.5	3.25	7	7	4.5	6.83333	6	6.625	6.57143	3.76923	4.33333	4.5	4	75.3333	0
Male	1302	3	85	85	10	0	2	10	0	0	4	4	5	5	4	4	4	4.28571	1	4	2	2.5	0	1	21	3	2	1	1	2	0	0										4.76923	4.66667	4.83333	3	70.2703	1
Female	1303	4	45	54.9	7	1	0	8	0	0	4	1	4	2	3	2	4	2.85714	3	5	5	23	0	3	21	4	1	4	3	11	3	3	5.5	2	5.16667	2.33333	3.25	5.66667	1.88889	3.625	1.42857	4.46154	4	5			0
Male	1304	4	80	80	14	0	2	14	1	0	4	3	3	4	5	4	4	3.85714	4	5	5	18	0	2	21	3	2	2	2	7	0	2	4	1.25	4.5	3	4.75	5.33333	6.55556	5.75	4.42857	4	2.33333	4.66667	3	58.8589	1
Female	1306	4	50	61	9	9	2	18	0	0	5	4	3	5	5	4	5	4.42857	3			13	0	1	18	1	1	1	0	1	2	2										4.69231	4	4.5	2	37.6667	0
Male	1307	4	85	85	9	11	2	20	1	1	5	5	5	5	5	4	4	4.71429	2	4	2	8	0	2	21	3	2	3	2	8	3	1	1.83333	1.75	5.5	3.33333	6.5	6.5	2	3	2.14286	5	4.83333	5	4	81.982	1
Female	1308	4	60	73.2	7	1	2	8	1	0	4	1	1	2	4	5	4	3	5	4	4	2.5	0	2	20	2	3	0	2	3	1	3										4.84615	4.66667	5			0
Male	1309	4			8	3	2	11	0		2	1	2	4	4	3	3	2.71429	5	4	4	13	0	4	23	4	1	2	2	7	0	0	4.83333	3.25	5.33333	4.66667	5.25	6.16667	4.66667	5.375	4.85714	3.69231	2.83333	4.16667			1
Female	1310	4	45	54.9	8	0	0	8	0	0	4	4	3	3	5	2	3	3.42857	3	4	4	13	0	1	18	1	1	1	1	3	2	3	4.33333	1.5	5.5	6	6.25	6.83333	2.33333	6.25	3.71429	4.61538	4.66667	5			0
Female	1311	4	50	61	11	0	5	11	0	0	4	1	4	4	5	5	1	3.42857	3	5	5	18	0	3	21	3	2	3	2	8	2	3	4.33333	6.25	2.66667	3.5	7	7	7	7	7	5	5	5	2	36	0
Female	1312	4	45	54.9	6	0	0	6	0	0	5	1	1	1	2	2	3	2.14286	2	5	5	23	0	1	19	1	3	1	1	3	0	0	5.5	2.5	5	1.66667	4.75	6.33333	3.88889	4.25	3.28571	3.92308	1.83333	4.66667			0
Male	1313	9	60	60			0		1	0	3	3	3	2	3	2	3	2.71429	2	4	2	13	0	2	22	4	3	4	4	12	0	2	2	1.75	3.5	3.66667	4.25	4.83333	3.22222	4	3.14286	3.69231	3.33333	3.83333			1
Female	1314	4	52	63.44		0	5		0	0	5	1	1	4	5	4	4	3.42857	2	5	5	23		1	21	4	3	2	4	10	0	2	4.5	3	6.5	4	4	6.66667	2.77778	5.625	5.85714	5	3.66667	4.66667	2	27	0
Female	1316	4	55	67.1	6		0	6	0	0	5	3	4	5	5	5	4	4.42857	2	4	4	8	0	2	19	1	3	1	1	3	0	2	4.16667	4.5	3.5	5.33333	5.75	6.16667	3.77778	5.5	4.28571	4.92308	4.33333	5			0
Female	1317	4	39	47.58	10	2	2	12	0	0	3	2	3	3	2	2	2	2.42857	3	4	4	8	0	1	19	1	1	1	1	3	2	2	4.33333	3.25	4.83333	3.66667	4.25	5.16667	3.77778	4	2.85714	3.92308	2.66667	4.66667			0
Female	1318	4	50	61	10	0	0	10	0	0	2	1	1	2	2	2	2	1.71429	1	4	5	23	0	1	20	2	2	2	1	5	2	0	5	1.5	4.83333	3.33333	3.75	5.66667	4.77778	5.375	4.28571	3.38462	2	5			0
Male	1319	4	70	70	9		0	9	1	0	4	3	2	3	3	4	4	3.28571	1	4	4	23	0	1	21	3	1	3	2	8	0	3	5.5	3	3.5	3.66667	6	6.33333	3.55556	4	3.42857	4.23077	3.83333	4.33333	4	84.3844	1
Male	1320	4	70	70	7	0	2	7	0	0	5	2	3	4	4	5	5	4	3	5	5	18	0	5	23	5	3	4	0	4	0	0	4.83333	3.5	2.5	1.33333	2	4.83333	4	4.375	5.57143	2.84615	1	4.83333	1	24.3243	1
Female	1321	4	50	61	7	1	2	8	1	0	2	1	1	3	4	3	4	2.57143	2	5	5	8	0	1	20	2	3	2	1	4	0	1	5.33333	5.25	5.83333	5.5	5.25	5.16667	4.55556	5.25	4.28571	4.61538	4.66667	4.66667			0
Female	1323	4	75	91.5	11	1	2	12	0	0	5	1	1	5	4	2	2	2.85714	5	5	5	8	0	1	20	3	2	3	1	5	0	0	5.16667	2	4.33333	2.5	4.5	7	5.22222	5.5	4.85714	3.07692	1.83333	3.66667	1	14.6667	0
Female	1324	4	80	97.6	10	0	5	10	1	0	5	2	3	4	5	3	4	3.71429	5	5	5	23	0	1	23	5	1	3	2	6	0	1	2.83333	1.5	4.66667	3	2.5	5	1.77778	5	3.28571	4.38462	2.66667	4.5	4	82.6667	0
Female	1325	4	70	85.4	11	2	0	13	0	0	4	4	5	5	5	4	5	4.57143	1	5	4	18	0	1	20	2	1	2	2	6	2	3										4.53846	3.83333	4.5			0
Male	1328	4	50	50	7	0	2	7	1	0	2	1	1	3	2	3	5	2.42857	2	5	3	13	0	2	19	2	2	2	1	5	1	3	6	3	3.16667	2.33333	6.25	6.5	2.44444	4	3.28571	4.23077	4	4.16667			1
Male	1331	4	45	45		2	0		0	0	4	2	1	4	4	2	4	3	2	5	4	13	0	1	19	1	3	1	1	3	0	3	4.66667	2.5	4.83333	5.33333	6.5	6.5	2.66667	6	3.85714	4.92308	4	4.66667			1
Male	1333	4	90	90	11	1	2	12	1	0	5	5	5	5	5	5	4	4.85714	3	5	4	23	0	2	21	3	1	3	2	7	3	3	2	1.25	2.33333	2.66667	5.5	6.16667	2.22222	2.625	1.85714	4.38462	3.16667	4.33333	4	92.4925	1
Female	1334	4	50	61	3	4	5	7	0	0	5	3	4	4	5	4	4	4.14286	2	3	3	2.5	0	2	20	2	1	1	0	2	3	1	2.16667	3.5	4.83333	3.5	5.25	6.33333	4.66667	5	5.14286	3.69231	2.83333	4.83333	3	65.3333	0
Male	1335	4	75	75	9	0	0	9	1	0	5	4	5	5	5	3	4	4.42857	1	4	3	2.5	0	2	21	4	2	4	3	11	2	3	5.5	2.25	2.16667	1.66667	6.25	6.83333	2.77778	2.875	1.14286	4.92308	4.66667	4.33333			1
Female	1336	4			8	7	0	15	1	0	4	3	3	4	5	4	4	3.85714	2	4	4	13	0	1	18	1	3	1	1	3	0	2	4.33333	3.25	3.16667	3.5	5.75	6.16667	5.77778	6	5.57143	3.76923	3.16667	4.16667	1	12	0
Male	1337	4	50	50	6	4	2	10	0	0	4	3	4	4	4	3	4	3.71429	4	5	5	26	0	1	19	1	2	1	0	2	0	0	7	2.25	5.66667	4.5	5.5	6.33333	5.77778	4.875	4.57143	4.38462	2.66667	4.5	1	11.1111	1
Male	1339	4	65	65	11	0	2	11	0	0	5	1	1	1	4	5	4	3	5	5	1	23	0	4	21	3	1	3	3	9	2	2	6.16667	3	4.33333	4.16667	6.25	6.83333	3	5.5	3.71429	4.61538	3.5	4.83333	2	46.2462	1
Male	1340	4	90	90	12	1	2	13	1	1	5	5	5	5	5	5	5	5	2	5	4	13	0	1	22	4	2	3	2	8	2	0										4.69231	4.16667	4.66667	4	88.2883	1
Female	1341	4	45	54.9	7	0	0	7	0	0	3	2	2	4	4	3	2	2.85714	1	5	5	23	0	1	19	1	3	1	0	2	0	2	3.5	2.25	3.5	5	5.75	6.33333	3.55556	5	4.28571						0
Female	1342	4	45	54.9	7	1	0	8	0	0	5	1	1	1	5	4	4	3	1	5	5	23	0	1	18	1	3	1	0	2	0	0	6.33333	5.75	4.66667	5.83333	5.25	6.83333	3.77778	6.5	4	3.84615	1.83333	4.33333			0
Male	1343	5	90	90	11		2	11	1	1	2	2	2	2	2	2	3	2.14286	2	5	5	2.5	0	2	23	5	3	4	4	12	0	2	3.33333	4	5.16667	6.5	5.5	5.66667	3.33333	6.25	4.57143	4.07692	4.5	5	4	98.4985	1
Male	1344	5	70	70	6	1	0	7	0	0	3	2	5	3	4	4	3	3.42857	1	5	4	23	0	1	20	2	1	2	2	6	2	3	3.33333	1.25	3.5	4	5.25	5.83333	2.66667	3.875	2.28571	5	4.83333	5			1
Female	1345	5	50	61	7		2	7	0	0	3	2	2	2	3	4	2	2.57143	5	5	5	8	0	1	20	2	1	2	1	5	0	1	6	3.25	5.66667	5	5.25	5.66667	3.44444	4.375	4.71429	4.07692	3.5	3.83333			0
Female	1346	5	65	79.3	9	2	2	11	0	0	4	1	1	1	1	4	2	2	4	5	5	8	0	3	21	3	2	3	2	5	0	0	6.33333	3.75	6.33333	3	2	5.5	5.33333	5.5	6.28571	3	3.66667	4.33333	3	68.3333	0
Male	1347	5	80	80	8	2	2	10	1	0	4	2	2	5	5	4	3	3.57143	2	4	5	13	0	1	21	3	1	2	0	2	0	1	5.5	1.25	2.33333	1.5	3.5	5	3.44444	2.25	2.28571	3.30769	2.5	3.83333			1
Female	1348	5	40	48.8	6	1	2	7	0	0	4	1	1	1	3	4	3	2.42857	3	5	5	18	0	1	19	1	3	1	0	2	0	2	4.16667	5.5	4.83333	4.83333	4.5	6.16667	5.66667	6	6.71429	3.46154	1.83333	4.5	2	26.3333	0
Female	1349	5	52	63.44	6	1	5	7	0	0	5	3	3	2	5	2	5	3.57143	1	4	2	8	0	1	20	3	1	3	2	8	2	1										4.07692	3	4.83333			0
Female	1351	5	57.5	70.15	6.5	2.5	5	9	0	0	2	2	2	2	2	1	1	1.71429	4	5	5	8	0	2	20	3	1	2	1	6	3	2													4	96.3333	0
Male	1353	5	55	55	7	1	2	8	0	0	4	3	4	3	3	4	4	3.57143	3	2	3	8	0	3	21	3	3	2	3	8	0	2	2.66667	1.75	5.16667	2.66667	5.25	5.66667	2	3.125	1.85714	4	3.16667	4			1
Male	1354	5	90	90	12	0	2	12	0	0	2	2	2	4	4	3	4	3	2	5	4	13	0	2	20	2	3	2	1	5	0	1	3.66667	3	6	2.66667	3.25	5	3.44444	4	2.85714				1	3.003	1
Female	1356	7	45	54.9	6	0	0	6	0	0	1	1	1	1	4	2	2	1.71429	1	5	5	18	0	1	19	2	3	2	2	6	0	3	4.66667	2.5	5.66667	3.5	5	5.83333	4.88889	5.375	4.42857				2	34.3333	0
Male	1357	6	45	45		1	5		0	0	5	2	3	5	5	2	4	3.71429	5	5	4	8	0	1	20	2	3	2	1	4	0	1	6.16667	6	5.83333	6.16667	4	6.83333	6.55556	5.125	5.71429	4.53846	3.33333	5			1
Male	1358	6	80	80	12	0	2	12	0	0	3	1	3	5	4	2	2	2.85714	5	4	5	13	0	1	20	3	3	3	2	8	0	1	6.66667	6.5	4.16667	5.66667	4	5.66667	6.11111	4.625	4.71429	4	3.5	4			1
Male	1359	6	20	20	8	3	0	11	0	0	5	3	4	4	3	3	4	3.71429	4	5	5	8	0	1	20	1	2	0	1	2	1	3	4.66667	2.5	5.16667	7	7	7	6.22222	6.25	3.28571	5	4.83333	4.66667			1
Female	1360	6			7	0	0	7	0	0	4	1	2	3	4	1	3	2.57143	1	5	5	13	0	1	19	1	2	1	1	3	2	1	1	1	3.33333	1	2	6	3.22222	3.5	1.85714	4.23077	2.16667	4.16667	1	22	0
Male	1361	6	70	70	6	0	2	6	0	0	4	1	3	3	4	3	3	3	2	3	2	2.5	0	5	22	4	1	4	3	9	1	2	5.66667	1.5	4.33333	4.16667	6	6.83333	1.66667	3.5	1				2	27.3273	1
Male	1362	6	45	45		5	2		0	0	4	1	1	1	4	4	5	2.85714	4	4	4	26	0	1	19	2	3	1	0	1	0	1	6.66667	5	6.83333	5.16667	2.5	5.33333	7	7	7				1	0.3003	1
Female	1363	6	48	58.56	8	1	2	9	0	0	5	1	1	2	5	4	5	3.28571	4	5	5	18	0	1	23	6	3	4	4	12	0	1	4.5	3.5	6	4.16667	5	7	5.77778	6.75	6.57143	4.61538	2.83333	5	3	59.3333	0
Male	1364	6	60	60	9	0	10	9	1	0	3	2	2	4	3	2	2	2.57143	4	4	5	26	0	2	22	6	2	4	3	11	2	3	4.83333	4.25	4.5	3.66667	5.5	6.16667	6	5.5	5.14286	4.46154	4	4.33333			1
Male	1366	6	100	100	13	0	0	13	0	0	5	3	3	2	4	3	4	3.42857	1	4	4	13	0	2	22	6	1	5	5	12	2	2	2.83333	2	2.16667	1.66667	6	7	1.33333	3.625	1.42857	4.92308	4	5	4	95.7958	1
Female	1368	6					2		0	0	4	1	1	1	1	3	2	1.85714	2	3	1	8	0	1	21	3	3	2	2	7	0	0	1.5	1	3	1	2	1.5	1	1.5	1.57143	3.15385	2.5	3.33333			0
Male	1369	6	60	60	7	7	0	14	0	0	3	2	1	4	4	3	3	2.85714	2	5	5	26	0	1	19	1	1	1	0	2	0	2	4.66667	1.75	3.83333	5.33333	5.75	5.83333	4.11111	4.875	4.71429	4	4.5	4			1
Female	1370	6	50	61		1	2		1	1	3	1	1	2		3	2		2	5	5	26	0	1	21	4	1	4	4	12	0	3										4.23077	3	5	4	95.3333	0
Male	1371	6	65	65	7	2	5	9	0	0	5	1	4	5	5	5	5	4.28571	5	3	3	8	0	1	23	4	3	4	3	11	0	1	6.5	4.5	6	2.5	5	6.83333	4.77778	5.375	4.71429	4.07692	2.5	5	2	40.2402	1
Female	1372	6	40	48.8	6	2	2	8	0	0	2	1	1	2	2	2	2	1.71429	4	5	5	18	0	1	20	2	1	2	1	5	0	1	5.5	3.5	6.33333	4	3	5.66667	3.66667	5.875	4.14286	3	2	3			0
Female	1373	6	47	57.34	6	1	2	7	0	0	4	2	2	2	4	2	3	2.71429	4	5	5	26	0	2	21	3	3	1	3	7	0	1	4	2.75	3	3	4.25	5.33333	3.22222	3.5	2.71429	3.84615	3.16667	4			0
Female	1374	6			6	3	2	9	0	0	1	1	1	1	1	1	1	1	4	5	5	18	0	1	20	2	2	2	2	4	2	1	1.66667	1	2.5	1	2.25	3	1.22222	1.625	1.14286	4.46154	3	4	2	38.6667	0
Female	1375	6	55	67.1	7	6	2	13	0	0	2	1	1	1	2	2	1	1.42857	3	5	2	23	0	1	20	3	3	3	2	7	0	2										4.23077	3.5	4.83333	2	41	0
Female	1377	6	40	48.8	7	1	0	8	0	0	5	1	1	1	4	4	3	2.71429	2	5	5	13	0	1	19	1	3	1	0	2	0	0										3.92308	2.66667	4.83333			0
Male	1378	6	65	65	10	3	2	13	0	0	4	2	2	4	5	3	3	3.28571	3	5	4	13	0	1	19	1	2	1	1	2	1	2	5.66667	4.5	5.33333	5	5.75	6.16667	3.22222	5.625	2	4.61538	4	4.66667	2	26.7267	1
Male	1379	6	70	70	7	0	5	7	0	0	3	2	3	4	5	4	3	3.42857	4	4	4	13	0	2	22	4	1	4	3	11	2	3	5.16667	4.5	5.16667	5.66667	5.5	5.83333	5.33333	5.625	4.85714	4.15385	4	4.16667			1
Male	1380	6	70	70	8	2	0	10	0	0	5	4	4	4	4	5	5	4.42857	2	5	5	8	0	1	19	1	1	1	0	2	2	1															1
Male	1381	7	90	90	10	0	0	10	0	0	5	4	5	5	5	5	5	4.85714	5	5	5	8	0	1	21	4	3	4	3	11	0	0	4.33333	2.5	4.33333	6.16667	5.5	7	1	5.25	5.28571	5	4.16667	4.83333	2	47.1471	1
Male	1382	7	80	80	7	0	2	7	0	0	4	3	3	5	5	2	3	3.57143	2	3	3	8	0	2	22	4	1	4	3	11	2	3	5.16667	4	5	5.5	5.75	6.16667	3.88889	4.5	4.42857	4.07692	2.83333	4.16667	3	74.4745	1
Female	1383	7	60	73.2	10	4	2	14	0	0	5	1	1	1	4	2	5	2.71429	2	4	5	26	0	1	22	4	3	3	3	9	0	2										3.69231	3.83333	3.16667	2	47.3333	0
Female	1384	7	50	61	5	0	10	5	1	1	5	5	5	5	5	5	1	4.42857	5	1	1	2.5	1	5	24	5	1	5	0	10	3	0	1.83333	4.25	6	5.83333	2.25	3.16667	5.33333	3.5	3.57143						0
Male	1385	7	65	65	6.5	2	2	8.5	0	0	2	1	1	4	3	2	2	2.14286	4	5	5	18	0	2	21	4	2	2	1	5	0	1	4	2	5.5	4.66667	5.75	5.83333	4.11111	6	4.85714	4.38462	3.83333	4.83333	1	16.2162	1
Female	1387	7	25	30.5		0.5	0		0	0	4	1	3	4	4	3	3	3.14286	2	5	5	8	0	2	18	1	3	1	0	2	0	3	6	5	6.16667	5.83333	6	6.66667	5.11111	6.125	5.42857	4.23077	3.66667	4.5			0
Male	1388	7	80	80	10	2	5	12	0	0	4	2	2	4	4	2	4	3.14286	5	5	5	13	0	2	20	3	1	2	2	7	0	0	2.83333	2	4.33333	3.83333	5.5	6.16667	2.77778	4.375	1.85714	4	3.83333	5	1	13.8138	1
Female	1389	7	35	42.7	6	0	2	6	0	0	3	1	1	1	1	3	2	1.71429	1	5	5	23	0	1	21	4	3	3	2	7	0	0	3.83333	2.75	5.66667	2.66667	2.25	5.5	4.77778	4.625	3.57143	3.23077	2.33333	3.5			0
Female	1390	7	45	54.9	7		2	7	0	0	3	1	1	1	3	4	4	2.42857	2	4	5	23	0	2	20	3	3	3	2	7	0	0	3.16667	2.75	5.16667	2.33333	3	6	3.66667	3.625	4.28571	3.15385	1.5	4.33333			0
Male	1391	7	80	80	9	0	0	9	0	0	3	2	2	5	5	2	3	3.14286	1	5	5	13	0	1	20	2	1	2	2	6	1	1	4.5	2.25	4	5.33333	5.5	6.83333	3.66667	5.75	4.57143	4.53846	3.66667	5			1
Male	1392	7	80	80	10	0	5	10	0	0	3	1	1	1	4	4	3	2.42857	3	5	5	18	0	2	20	3	3	3	3	8	0	1	5.33333	2.75	5	3.66667	2.75	6.66667	5.77778	5.125	5.85714	3.38462	1.66667	4	3	67.5676	1
Female	1393	7	36	43.92	6	6	5	12	0	0	2	1	1	1	1	3	3	1.71429	2	5	5	13	0	1	21	4	1	3	3	9	0	0	4.16667	4.5	5.33333	5	6.5	6.5	5.11111	5.875	4.57143	4.53846	3	4.33333			0
Male	1394	8	60	60		1.5	2		0	0	3	3	4	4	4	4	1	3.28571	5	4	4	8	0	2	19	1	2	1	1	2	0	0										3.69231	4	4.83333	1	10.5105	1
Female	1395	7	50	61	7	1	5	8	0	0	5	2	2	5	5	2	3	3.42857	5	4	3	2.5	0	1	21	4	3	4	3	9	0	3	5.33333	3.5	5.83333	5.83333	6.5	7	4.44444	6.625	5.14286	4.84615	3.83333	5			0
Male	1396	7	100	100	9	0	0	9	0	0	3	2	4	5	3	2	3	3.14286	2	3	2	8	0	2	22	4	1	4	3	11	1	1	3.5	2.75	4.16667	5.66667	6	6.5	2	5.25	3.28571	4.53846	4.83333	4.33333	4	90.3904	1
Male	1397	7	80	80	9	0	2	9	0	0	5	4	4	5	5	3	4	4.28571	2	5	5	13	0	1	20	2	1	1	0	2	2	3													4	93.0931	1
Male	1398	7	80	80	9	0	2	9	0	0	4	2	2	4	4	2	3	3	4	5	5	8	0	1	20	3	1	2	2	6	2	3	2.33333	1.5	2.16667	2.66667	5.25	5.16667	1	2.875	2.57143	4.61538	4.16667	4.66667	4	86.1862	1
Male	1400	7	75	75	9	0	2	9	0	0	4	1	1	4	2	2	2	2.28571	3	4	5	8	0	1	21	4	1	4	4	8	2	2	6.33333	4.25	3.66667	2.33333	6.25	7	3.33333	4.5	2.71429	4.76923	4	5	2	36.6366	1
Male	1402	7	50	50		6	2		0	0	4	2	2	5	3	4	3	3.28571	4	4	4	18	0	3	20	3	1	2	2	4	0	0	3.66667	2.5	6.16667	5	7	7	5.66667	6.875	4.57143	4.76923	3.33333	5			1
Male	1404	7	90	90	12	1	8	13	1	0	4	3	2	5	5	1	3	3.28571	5	3	2	8	0	1	21	2	3	1	1	3	0	2	6.16667	3.5	5	5	5.5	6.5	4.77778	5.375	4.42857	4	3	4.33333	2	43.5435	1
Female	1405	7	72.5	88.45	8	1.5	0	9.5	1	1	5	5	5	4	5	1	3	4	1	4	3	2.5	0	2	20	3	1	3	2	7	3	3										4.76923	3.33333	4.83333	4	97.6667	0
Female	1406	7	65	79.3	10	3	0	13	0	0	4	1	1	2	2	3	1	2	5	5	5	26	0	1	23	6	1	3	4	11	2	0	6.33333	3.5	6.33333	4.5	5.25	6.83333	3.88889	6.125	5.14286	4.53846	3.33333	4.33333			0
Female	1408	8	50	61	6	1	2	7	0	0	3	1	1	1	1	1	2	1.42857	1	5	5	8	0	1	22	4	3	4	4	12	0	2	4	2.25	5.33333	4.33333	6.25	5.5	2.66667	4.625	1.71429	4.46154	3.5	4.5	3	53.6667	0
Female	1409	8	30	36.6	7	2	0	9	0	0	5	3	4	5	5	5	5	4.57143	2	5	5	8	0	2	21	3	3	1	0	1	1	1	5.66667	7	2.16667	5.33333	7	7	5.77778	7	6.85714	5	5	5			0
Male	1410	8	80	80	6	3	2	9	1	0	4	4	5	5	5	3	4	4.28571	3	5	4	8	0	1	19	1	2	1	0	2	0	2										4.23077	2.66667	4	2	40.5405	1
Male	1411	8	50	50	7	1	0	8	0	0	3	1	1	1	4	4	3	2.42857	2	4	3	18	0	1	19	1	3	1	0	2	0	0	4.83333	4	4.33333	4.5	6	6.16667	5.22222	5.25	4	3.92308	3.5	3.83333			1
Male	1413	8	52	52	7	3	2	10	0	0	5	1	1	3	5	5	4	3.42857	5	4	4	8	0	1	20	2	3	2	2	6	0	0	3	3.75	4.16667	4	6.25	6.33333	3.44444	4.25	2.28571	4.61538	4.33333	5	1	0.600601	1
Male	1415	8	100	100	12	0	2	12	1	1	4	4	4	4	4	3	3	3.71429	2	4	3	8	0	3	21	4	3	4	4	12	0	1	3.5	3.75	4.83333	2.83333	3.75	3.83333	2	3.25	2.14286	3.92308	3.5	4	4	78.3784	1
Male	1417	8	45	45		2.5	2		0	0	3	4	4	5	5	3	2	3.71429	5	4	5	18	0	1	22	6	1	2	3	9	2	1	6	4.75	4	3.83333	4	5.83333	3.77778	5.125	4	3.07692	2.83333	3.66667			1
Male	1418	8	70	70		0	0		0	0	4	2	3	4	4	2	4	3.28571	2	2	2	2.5	0	1	19	1	1	1	0	2	2	2	2	2	1.66667	4.33333	6.5	6	3.44444	4.625	3.42857	4.76923	4	4.66667	3	58.5586	1
Female	1419	8	45	54.9	7	1	5	8	1	0	2	1	1	3	4	5	2	2.57143	4	5	5	13	0	1	20	3	1	3	1	6	0	1	4	3	3.83333	4.33333	5.5	6	5.22222	5.25	4	3.38462	3.16667	4.33333	1	2.33333	0
Male	1421	9	40	40	6	4	2	10	0	0	4	1	1	1	2	2	3	2	2	4		18	0	2	18	1	3	1	0	1	0	0										3.76923	3.66667	4	1	1.5015	1
Female	1422	9	40	48.8	6	1	2	7	0	0	2	1	1	1	1	4	1	1.57143	5	5	5	18	0	1	21	4	3	4	2	6	0	2										3.76923	4.16667	4	1	6.66667	0
Male	1423	9	60	60	7	0	0	7	0	0	4	1	2	2	3	2	4	2.57143	2	4	4	13	0	1	19	1	1	1	1	3	2	2	3.83333	5.75	5	3.83333	4.5	6.16667	3.77778	4.5	3.42857	3.61538	2.83333	4	3	52.2523	1
Male	1424	9	80	80	9	0	0	9	0	0	2	1	1	1	1	5	2	1.85714	1	4	4	23	0	1	22	4	1	4	4	12	0	2	2.83333	5.75	1.33333	3.5	4	3.5	2	2	1.57143	3	4.33333	3.83333	4	84.0841	1
Female	1425	9	40	48.8	7	2	2	9	0	0	4	1	1	2	3	5	4	2.85714	3	4	4	13	0	3	22	6	3	4	3	10	2	0	5	4	4	2	2	5.66667	5.66667	5.625	4.28571	4	2.66667	5			0
Female	1428	9	45	54.9	7	2	0	9	0	0	4	1	1	2	3	2	4	2.42857	1	5	5	23	0	1	20	2	3	2	2	6	0	1	5	4	5.66667	4.83333	6.75	6.83333	4.22222	5.375	4.28571	5	3.5	5	1	23.3333	0
Female	1429	9	52	63.44	8	3		11	1	0	5	4	3	4	4	4	4	4	4	4	5	18	0	4	21	4	1	3	2	8	2	3										4.92308	3.83333	4.83333	4	79.6667	0
Male	1430	9	88	88	7	0	2	7	1	0	5	4	5	5	5	5	5	4.85714	2	4	5	2.5	0	2	21	3	1	3	2	7	2	0	7	3	4.33333	3.16667	6.25	6.83333	6.77778	7	6.28571	4.15385	2.66667	4.33333	3	61.5616	1
Female	1431	9	43	52.46	6	0	0	6	0	0	3	3	3	4	4	4	4	3.57143	4	4	4	13	0	1	19	1	1	1	0	2	2	1	5	2.75	5.66667	3.83333	5	6.33333	3.77778	4.25	4.57143	4.07692	2.5	4.33333			0
Male	1432	9	75	75	9	0	2	9	0	0	5	3	3	4	4	2	5	3.71429	1	5	5	26	0	1	22	4	2	4	3	10	1	0	2.83333	1	2.83333	3.33333	5	5.66667	1.66667	4.375	1	4.84615	3.16667	4.66667	2	41.7417	1
Male	1433	9	70	70	9	0	2	9	0	1	5	4	2		4	4	2	3	4		1	2.5	0	3	24	6	2	4	4	12	3	1	5.66667	4.5	5	5.5	6	6.66667	3.77778	6	6	3.92308	4.66667	4	3	73.8739	1
Male	1434	9	65	65	7	4		11	0	0	4	2	2	2	3	3	3	2.71429	2	4	4	13	0	3	20	2	3	2	1	4	0	1										3.53846	2.33333	3.83333	1	18.9189	1
Male	1435	10	40	40	6	1.5	2	7.5	0	0	4	3	5	5	4	3	5	4.14286	4	4	3	2.5	0	1	20	3	1	2	1	4	2	2	5.16667	2.75	4.16667	4.33333	3	6.33333	5.22222	4.625	5.57143	3.92308	2.33333	4			1
Female	1436	10	40	48.8	7	3	5	10	0	0	3	1	1	1	5	5	4	2.85714	5	5	5	23		1	20	2	3	2	0	2	0	0										3.76923	2.5	4.83333			0
Male	1437	10	55	55	6	3	2	9	1	0	5	4	5	5	5	5	5	4.85714	3	5	2	8	0	1	19	2	3	2	1	4	0	1	4.33333	3.25	5.5	5.66667	5	6.5	2.66667	5.75	5.28571	4.61538	3.5	4.83333	3	71.1712	1
Female	1438	10	50	61		0	0		0	0	5	1	1	3	3	2	3	2.57143	2	5	4	13	0	2	20	2	2	2	1	5	2	2	4.83333	3.75	3.33333	3.5	4	4.66667	4.88889	3.75	5	3.84615	2.16667	4.33333	2	42.3333	0
Male	1440	11	107.5	107.5	7	7	2	14	1	0	4	3	3	5	3	2	4	3.42857	1	4	4	13	0	2	23	5	1	3	3	9	2	1	4.33333	3.25	4.33333	4.16667	5.25	5.66667	4.22222	4.375	3.14286	4.15385	4.33333	4.16667	4	76.8769	1
Male	1442	11	80	80	7	2	0	9	1	0	5	5	5	5	5	3	4	4.57143	1	4	4	13	0	1	19	1	2	1	0	2	2	2	5.33333	3.75	6	5.5	5.25	6.33333	5	5.75	5.28571	4.61538	3.83333	4.33333			1
Female	1444	12	40	48.8	8	0	2	8	0	0	5	5	4	5	5	2	5	4.42857	2	4	4	8	0	1	18	1	1	0	1	2	0	2	4.66667	3.5	4.5	4.83333	5.75	7	3.66667	5.625	5.28571	4.92308	3.16667	5			0
Male	1445	12	100	100	10	0	2	10	1	0	2	2	5	2	3	4	1	2.71429	4	5	5	18	0	1	21	3	1	2	2	6	3	3	2.5	1	3.66667	4.33333	6.25	6.33333	1.55556	2.875	1	4.46154	3.83333	5			1
Male	1446	14	75	75	12	1	0	13	0	0	5	3	3	3	4	4	3	3.57143	2	5	5	18	0	2	20	2	1	2	2	5	2	1	5	4.5	2	1.33333	4.25	5	4	1	2	3.61538	2.5	4	1	3.6036	1
Female	1447	14	50	61	9	2	2	11	1	0	4	2	2	3	4	2	5	3.14286	3	4	5	18	0	1	21	3	3	2	3	8	0	3	3.83333	2	4.66667	3	6	6	3.66667	4	3.57143	4.38462	3	4.5	2	25	0
Female	1448	14	50	61	8	1	2	9	0	0	4	2	4	3	5	4	3	3.57143	2	5	2	13	0	1	21	3	1	3	3	8	3	2	3.33333	3	3.5	4.16667	5.25	5.66667	1.66667	3.875	3.14286	4.23077	4.33333	5	3	67.3333	0
Male	1449	14				2	0		1	1	5	5	5	5	5	5	1	4.42857	5	1	1	26	0	1	20	2	3	1	0	2	3	3															1
Male	1450	14	50	50	7	0	2	7	0	0	2	1	1	1	2	2	2	1.57143	4	4	4	18	0	2	22	4	3	3	3	9	0	1	4	3.5	4.66667	4	4.25	5.83333	3.77778	5	5	3.53846	3	4.83333	2	25.2252	1
Male	1451	14	90	90	12	3	0	15	0	0	2	2	2	4	4	3	3	2.85714	1	4	4	13	0	3	21	3	2	3	2	7	2	2	3.33333	1.75	3.16667	3.66667	5.5	5.16667	5.66667	5.625	5.42857	4.69231	3.83333	4.66667	2	48.048	1
Male	1452	15	50	50	6	1	0	7	0	0	5	2	2	5	4	5	3	3.71429	2	3	4	2.5	0	2	19	1	3	1	0	1	0	0	5.66667	4	4.83333	5.83333	6.75	6	2.11111	5.375	3.57143	3.76923	3.66667	4.33333	1	0	1
Male	1453	15	85	85	10	1	2	11	0	0	4	4	5	5	5	5	5	4.71429	3	5	5	13	0	2	20	3	2	3	1	6	0	1	6.16667	4.5	4.66667	5.83333	6.5	7	6.33333	7	5.57143	4.76923	4	5	1	9.30931	1
Female	1454	16	50	61	6	1	2	7	0	0	4	2	2	4	4	2	4	3.14286	5	5	5	18	0	2	22	4	3	4	4	12	0	1	3.5	1.75	3.83333	1.16667	2.25	4.16667	2.77778	3.875	2.42857	4	2.5	4.66667			0
Female	1455	17	60	73.2	10	4	0	14	1	0	3	3	3	4	4	4	3	3.42857	5	4	4	26	0	1	22	4	2	4	4	11	2	2	4.66667	3.75	4.66667	2.83333	6	7	3.55556	3.625	1.71429	4.69231	4	4.5			0
Female	1456	17	12	14.64	2	3	2	5	0	1	4	2	3	3	3	3	5	3.28571	5	4	2	8	0	2	19	1	3	1	1	3	0	3	3.33333	2.5	4.66667	4.5	5	5	1.88889	4.25	2.85714	4.15385	4.16667	4			0
Male	1457	18	50	50	7	0	0	7	0	0	3	2	3	4	4	4	4	3.42857	2	4	5	13	0	1	18	1	3	1	1	3	0	1	3.83333	1.75	6.16667	2.83333	5	6.16667	5	4.5	4.14286	4.15385	2.66667	4			1
Female	1150	2	45		7	0	0	7	0	0	3	2	2	2	4	3	2	2.57143		5	5	13		2	19	2							24	9	29	26	20	39	38	34	35	53	21	28
Female	1151	2	50		8	1.5	10	9.5	1	0	4	2	2	4	4	3	5	3.42857		2	3	2.5		2	20	2
Female	1152	2	55		6	1	0	7	0	0	3	2	3	3	3	3	5	3.14286		5	5	23		1	20	3							42	8	38	32	15	42	52	51	37	55	9	30
Female	1153	2	60			0.5	2	0.5	0	0	5	2	1	1	4	4	4	3		4	5	8		1	19	1							40	18	36	34	21	42	58	54	47	53	14	30	1
Female	1154	2	85		12	0	2	12	1	1	4	3	4	4	4	3	3	3.57143		5	4	8		1	21	3							19	16	16	25	26	40	15	38	21				4
	1155	2
Female	1156	2	35		6	0	2	6	0	0	2	1	1	1	3	2	4	2		5	4	13		1	21	3							26	7	26	14	24	42	49	49	14	61	26	30
Female	1157	2	40		6	2	0	8	0	0	5	2	3	4	4	3	4	3.57143		5	3	18		2	22	4							41	17	26	18	19	42	49	40	38	54	20	26
Female	1158	2	75		9	0	5	9	0	0	4	1	1	1	4	2	2	2.14286		5	5	23		1	21	4							27	9	33	29	18	42	32	54	45	59	12	21
Male	1159	2	45		9	1	0	10	0	0	5	4	5	5	5	3	5	4.57143		5	4	8		1	21	1							21	12	26	25	26	41	30	43	31	64	28	30	4
Female	1160	2	50		6	2	5	8	0	0	4	1	1	2	1	2	2	1.85714		5	5	26		4	22	4							9	5	28	14	22	36	47	34	20	60	22	30
	1161	2
Male	1162	2	86		7.5	0	2	7.5	1	0	4	2	3	5	5	5	4	4		5	5	23		2	21	3							32	15	37	36	26	41	45	48	43	63	23	28
Male	1163	2	70		6	4	2	10	0	0	2	1	2	5	1	5	1	2.42857		5	3	26		1	22	5							12	4	7	11	28	23	36	21	20	63	29	29	1
Male	1164	2	70		10.5		0	10.5			4	4	4	5	5	5	5	4.57143		5	5	18		1	19	1																65	24	30
Male	1165	2			2	2	0	4	0	0	3	1	1	1	5	5	1	2.42857			2	2.5		1	18	1							36	10	36	36	28	42	57	56	43	63	18	30	1
Male	1166	2	80		9	0	2	9	0	0	4	2	4	5	5	5	4	4.14286		5	5	23		2	21	3							42	13	27	12	19	41	41	46	33	58	20	27	2
	1167	2
	1168	2
Male	1169	2	70		7	1.5	2	8.5	0	0	5	3	2	3	4	4	3	3.42857		5	5	8		1	19	1							31	15	25	34	28	42	51	53	40	65	30	30
Male	1170	2	40		6	0	2	6	0	0	2	1	1	1	3		2			4	4	8		1	20	3							22	15	30	16	7	24	45	30	30	29	12	15
Male	1171	2	80		9	0	2	9	0	0	5	1	1	5	5	3	5	3.57143		5	5	8		2	22	5																59	25	27	4
	1172	2
Male	1173	2	40			2	2	2	0	0	5	5	5	5	5	4	5	4.85714		5	5	13		2	19	1							27	6	23	36	22	32	24	44	45	65	23	30
	1174	2	65		7	0	2	7	0	0
Male	1175	2	70		9	0	2	9	1	0	4	4	4	5	5	3	4	4.14286		5	5	8		3	20	2							29	14	23	27	22	36	24	32	23	57	22	19	4
Female	1176	2	50		6	0	0	6	0	0	1	1	1	2	4	1	4	2		5	5	18		1	19	2							25	9	34	18	21	32	41	40	31				2
Male	1177	2	85		10	0	2	10	0	0	3	2	4	4	3	4	3	3.28571		4	2	8		2	20	2							22	10	22	22	25	42	48	47	35	52	20	28	3
Male	1178	2	80		7	0	2	7	1	0	3	2	2	1	4	3	2	2.42857		5	5	18		1	20	2							18	4	31	30	27	39	38	43	27	65	25	30
	1179	2	38		7		2	7
Female	1180	2	55		6	0	10	6	0	0	5	5	5	5	5	4	4	4.71429		5	5	13		1	20	2							37	16	35	32	23	39	49	52	46	59	22	27
Female	1181	2	35		6	3	2	9	0	0	3	1	1	1	2	3	2	1.85714		4	4	8		2	20	3							29	14	36	18	15	35	47	38	28	48	16	23	1
	1182	2
Male	1183	2	75		9	0	0	9	0	0	4	4	5	5	4	2	3	3.85714		4	3	2.5		1	19	2							10	9	18	42	19	33	10	32	29	65	28	30
Male	1184	2	90		9	0	0	9	0	0	5	2	4	4	5	5	3	4		4	4	18		1	20	2							14	7	24	17	17	34	31	26	21	56	18	25	2
Female	1185	2	45		6	1	0	7	1	0	5	1	1	1	5	4	2	2.71429		4	4	23		1	20	2							23	11	39	28	16	36	37	41	39	54	20	27
Female	1186	2	200		30	2	2	32	0	0	5	2	2	4	4	4	2	3.28571		5	4	18		1	22	4							30	19	31	17	14	33	33	37	20	54	18	24	3
	1187	2
Female	1188	2			6	1	2	7	0	0	3	2	2	2	2	1	3	2.14286		5	5	13		1	20	2							33	11	34	26	21	36	17	27	13	47	19	24
Female	1189	2	65		7	1.5	0	8.5	0	0	4	1	2	1	4	2	3	2.42857		4	4	18		1	23	5							30	17	33	28	23	41	44	52	43
Male	1190	2	20		2	1	2	3	0	0	4	2	2	2	3	4	4	3		5	5	26		3	20	2							32	21	28	31	18	29	47	40	32	48	14	24
Female	1191	2	25		6		0	6	0	0	3	1	1	1	3	4	3	2.28571		5	5	13		1	18	1																43	17	26
Male	1192	2	85		12	0	0	12	0	0	5	3	3	4	5	4	4	4		5	5	18		1	19	2							25	13	27	22	21	36	41	34	21	54	19	26	3
Male	1193	2	80		9	0	0	9	1	0	3	2	2	3	3	4	4	3		5	5	13		1	20	3																			4
Male	1194	2	85		10	0	5	10	0	0	5	2	1	2	5	5	2	3.14286		5	5	26		1	21	3																58	19	22	3
Male	1195	2	65		10	2	10	12	0	0	4	1	1	5	3	1	1	2.28571		5	5	13		1	21	3																60	13	28
	1196	2	60		8			8
	1197	2	65		6	1	2	7
Female	1198	2	50		7	1	0	8	1	0	3	1	1	1	2	2	2	1.71429		4	4	8		1	19	1							26	10	35	16	16	30	47	38	25	48	17	24	2
Female	1199	3	50		7		2	7	0	0	3	2	2	3	3	2	4	2.71429		5	5	23		2	21	3							37	22	37	35	15	40	54	50	42	57	25	26
Male	1200	2	60		7	0	0	7	0	0	3	3	3	4	3	1	2	2.71429		4	4	8		1	19	1							23	13	26	23	20	26	36	34	30	44	19	20
Male	1201	2	70		6	1	2	7	0	0	3	1	1	2	2	2	2	1.85714		4	4	2.5		1	21	3							27	14	34	14	21	34	36	34	18	64	25	29	1
Male	1202	2	50		5	0	2	5	0	0	2	1	1	1	2	4	3	2		2	3	8		1	21	4							42	28	15	13	24	35	22	21	7	46	29	19	1
Female	1203	2	80		9	0	2	9	0	0	5	4	4	5	5	2	5	4.28571		5	5	8		1	22	4							35	14	29	30	25	40	46	47	34	57	20	26	4
Female	1204	2	50		9	0	0	9	0	0	5	2	3	4	4	3	3	3.42857		4	4	23		1	21	4							34	19	36	34	19	39	51	41	42	59	24	24	3
Female	1205	2	35		7	3	2	10	0	0	1	1	1	1	1	3	2	1.42857		5	5	23		1	23	5							31	16	23	28	19	38	16	33	7	40	22	23	2
Male	1206	2	55		7	0	2	7	0	0	3	1	1	3	3	1	2	2		5	5	18		1	18	1							33	19	26	20	22	38	20	33	17	56	18	26
Male	1207	2	60		7	1	2	8	0	0	2	1	1	2	3	2	4	2.14286			5	13		1	18	1							20	7	35	20	19	38	16	32	18	52	17	24
Female	1208	2	65		10	3	0	13	1	0	4	2	2	5	5	2	2	3.14286		5	5	18		2	22	4							38	21	35	33	27	40	58	49	42	65	28	30
Female	1209	2	60		8	0	2	8	0	0	4	1	1	4	3	5	4	3.14286		5	5	23		1	21	3							28	16	29	24	23	41	32	35	19	52	20	27	3
	1210	2
Female	1211	2	40		10	2	0	12	0	0	2	3	3	2	3	2	3	2.57143		5	4	26		1	18	1							21	18	29	15	11	30	46	36	25	45	19	21
	1212	2
	1213	2
Male	1214	2	65		8	2	2	10	1	0	3	1	1	4	4	4	2	2.71429		4	5	8		1	18	1																63	23	25	2
	1215	2
Female	1216	2	35		6	0	2	6	0	0	4	1	1	1	4	3	3	2.42857		2	5	8		1	21	4							23	10	26	6	14	40	45	38	14	39	17	27
Female	1217	2	42		6	0	0	6	0	0	4	1	1	2	2	2	3	2.14286		4	4	13		2	19	1							31	17	30	30	19	33	33	44	31	48	23	22
Female	1218	2	75		10	2	0	12	1	1	4	3	3	4	3	2	4	3.28571		5	4	8		1	22	4							25	11	27	17	19	40	33	28	16	53	16	25	4
	1219	2
Female	1220	2	45		6	2	5	8	0	0	3	2	2	4	4	2	2	2.71429		5	5	13		1	18	2							34	13	27	23	17	32	33	36	29	58	23	29
Male	1221	2	67.5				0		0	0	4	3	3	4	5	5	1	3.57143		4	4	23		2	19	2							33	15	36	32	23	38	51	53	42	54	23	25
Male	1222	2	75		6	2	0	8	0	0	4	2	1	3	4	3	2	2.71429		4	3	8		2	22	4							28	9	30	23	20	36	49	41	32	59	23	28	1
Female	1223	2			6	2	2	8	0	0	4	4	5	5	4	2	4	4		4	3	18		1	19	1							21	8	13	18	17	35	20	36	19	53	22	24
Female	1224	2	40		7	1	2	8	0	0	5	2	1	5	5	5	4	3.85714		4	5	8		1	18	1							32	16	42	40	26	42	42	52	49	52	17	30
Female	1225	2	40		7	4	5	11	0	0	3	1	1	1	1	1	2	1.42857		4	4	26		2	21	4							32	24	33	29	19	32	48	41	38	48	21	24	1
	1226	2	85		10	3	2	13
Female	1227	2	90		6	1	2	7	1	0	4	1	1	1	1	2	2	1.71429		4	4	23		2	21	4							27	14	31	23	20	38	37	41	35	51	18	22
	1228	2
Male	1229	3	85		8	0	2	8	0	0	2	1	2	3	4	3	2	2.42857		2	2	8		1	20	2							18	4	18	31	22	38	20	35	21	61	28	25
Male	1230	3	95		12	4	2	16	0	0	5	3	4	5	5	5	4	4.42857		5	3	23		1	20	3																60	22	30	4
	1231	3
Female	1232	3	55		8	2	5	10	0	0	3	3	4	4	5	4	2	3.57143		5	5	18		1	19	2																50	29	25
Female	1233	3	57		6	3	0	9	1	0	4	3	3	3	3	2	4	3.14286		5	5	13		1	20	2							26	20	22	28	16	39	37	46	36	45	16	27	3
Male	1234	3	70		9	1	2	10	0	0	5	5	5	5	5	4	4	4.71429		4	3	8		1	18	1							31	18	30	29	28	41	54	41	37	57	25	28	2
Male	1235	3	80		10	3	0	13	0	0	4	3	3	5	5	3	4	3.85714		4	3	13		1	20	3							14	4	16	14	12	29	11	26	25	54	23	23	4
Female	1236	3	45		7	0	0	7	0	0	3	1	1	1	4	3	2	2.14286		5	5	23		1	18	1																			1
Male	1237	3	50		7	0	0	7	0	0	3	3	3	5	4	4	4	3.71429		4	4	8		2	19	1							21	12	20	28	26	42	28	46	32	65	29	30
Female	1238	3	73		11	0	2	11	0	0	4	3	3	5	4	3	4	3.71429		5	5	13		2	21	4							38	20	35	30	26	41	56	50	41	62	21	30	3
Female	1239	3	55		28	1	5	29	0	0	5	2	2	4	4	4	5	3.71429		4	4	8		2	23	6							39	28	34	39	25	41	40	54	41	63	27	30	3
	1240	3
Male	1241	3	75		75	3	0	78	0	1	4	1	1	1	3	2	2	2		5	5	8		1	23	4																62	29	29
Female	1242	3	30		6	1	0	7	0	0	4	1	2	4	4	4	3	3.14286		4	4	13		1	20	2							24	15	24	15	15	35	22	31	15	49	17	25
Male	1243	3	40		6	0	2	6	0	0	2	1	2	4	3	3	2	2.42857		5	5	23		2	22	4							22	11	22	27	26	41	30	32	15	56	22	29
Female	1244	3	60		7	0	2	7	0	0	4	2	2	4	3	2	3	2.85714		4	4	8		4	19	2							28	15	26	19	22	37	32	38	27	52	20	27	4
	1245	3	90		10	1	2	11	1	0	5	2	2	5	5	5	5	4.14286		4	2	2.5
Male	1246	3	50		7	0	2	7	0	0	2	1	1	2	3	3	3	2.14286		4	2	18		1	18	1							21	13	28	19	19	35	41	34	16	56	18	24	1
Male	1247	3	70		7	2	0	9	0	0	3	2	2	4	4	4	4	3.28571		3	2	13		1	23	5							32	16	27	31	23	37	33	42	29
Female	1248	3	55		6	1	0	7	0	0	4	1	1	3	3	2	2	2.28571		5	4	18		1	20	2							18	7	23	11	8	40	40	30	29
	1249	3
Male	1250	3	55		6	0	0	6	0	0	5	1	1	4	3	3	3	2.85714		5	5	26		2	18	1							33	19	31	34	18	37	57	47	36	61	21	19
Female	1251	3	48		7	0	2	7	0	0	3	4	5	5	5	5	5	4.57143		5	5	18		1	19	2							39	13	40	38	28	41	51	50	46				4
	1252	3
Female	1253	3				2	0	2	1	0	4	3	2	3	3	4	2	3		4	4	13		2	18	1																			2
Female	1254	3	65		8	1	2	9	0	0	4	1	1	2	2	2	2	2		5	5	23		1	22	4							35	17	19	27	20	34	60	49	45	38	18	24	4
Female	1255	3	45		6	1	10	7	0	0	4	3	4	3	3	1	3	3		5	5	13		1	20	2							30	12	22	21	23	40	26	42	27				3
Female	1256	3	35		8	1	5	9	0	0	3	1	2	3	4	5	4	3.14286		4	4	18		1	19	1							32	26	18	27	20	32	55	41	27	48	21	24	3
Female	1257	3	70		10	1	2	11	1	0	5	5	5	5	5	3	5	4.71429		5	5	18		3	21	2							38	19	32	37	25	42	55	53	48	64	25	28
Female	1258	3	50		8	3	0	11	0	1	5	4	5	5	5	4	5	4.71429		5	5	13		2	19	1							38	25	33	29	28	42	39	50	41	63	25	29	3
	1259	3
Male	1260	3	3				0		1	0	3	2	3	4	4	5	4	3.57143		5	5	26		2	18	1																54	22	30
Male	1261	3	45		28	0	0	28		0	4	4	4	5	5	4	4	4.28571		4	3	8		1	20	2							39	26	40	35	28	42	56	52	42	64	26	30
Female	1262	3	45			1	2	1	0	0	2	2	3	3	3	1	3	2.42857		5	5	8		2	19	2							18	5	19	18	11	29	30	32	13	44	13	26
Female	1263	3	40		6	1	2	7	0	0	4	1	1	2	3	1	2	2		5	5	8		1	20	3							22	7	35	24	22	35	20	33	15	51	11	26
Female	1264	3	50		8	1	5	9	0	0	2	1	1	1	2	2	2	1.57143		5	5	13		1	22	4							23	11	18	8	11	31	27	28	27	43	16	26
	1265	3
Male	1266	3	100		11	0	8	11	0	0	4	3	3	5	5	2	4	3.71429		5	5	13		1	23	6							37	17	39	24	27	42	35	38	22	64	25	30
Male	1267	3	70		10	1	2	11	0	0	3	1	1	3	3	5	2	2.57143		3	3	18		1	21	4							11	8	23	19	22	40	43	51	26	46	18	24	2
Female	1268	3	80		8		0	8	0	0	4	4	4	4	4	2	4	3.71429		5	4	8		1	21	4							23	9	22	26	21	40	34	50	41	63	26	29
Male	1269	3	105		12	0	2	12	0	0	5	5	5	5	5	3	4	4.57143		4	4	2.5		1	21	4							33	14	33	32	28	35	35	40	27	65	25	30	3
Female	1270	3	57		6	6	2	12	0	0	3	1	1	1	5	3	3	2.42857		5	4	13		1	20	3							28	28	28	33	23	42	54	56	44	49	10	30	2
Male	1271	3	55		9	0.5	2	9.5	0	0	4	3	4	5	5	2	3	3.71429		4	3	2.5		1	19	1							30	10	31	25	26	41	34	35	30	62	18	30
Female	1272	3	60		8	3	2	11	0	0	4	1	2	4	3	2	2	2.57143		5	5	18		2	20	2							30	19	35	23	20	34	31	42	36	52	21	24	2
Female	1273	3	70		10	0	2	10	0	0	5	3	5	5	5	3	4	4.28571		5	4	18		1	21	3							39	20	22	20	25	42	24	55	31	60	26	28	4
Male	1274	3	65		11	3	2	14	0	0	2	2	2	5	4	1	1	2.42857		5	3	8		2	22	4							35	9	15	23	27	40	27	26	13	65	26	24	1
Male	1275	3	65		10	2.5	10	12.5	0	0	2	2	2	4	3	3	2	2.57143		5	5	18		2	22	5							16	5	11	26	25	33	9	23	7	64	29	29
Male	1276	3	85		9	0	5	9	0	0	3	3	4	5	4	4	3	3.71429		3	3	8		2	23	5							24	10	23	31	28	37	28	44	25	59	27	22
	1277	3	80		10	2	2	12	1	1	5	5	5	5	5	4	5	4.85714
Female	1278	3				2	0	2	1		5	3	3	3	5	5	3	3.85714		5	5	8		3	19	1																54	17	30
Female	1279	3	38		7	2	0	9	0	0	5	2	2	4	4	4	5	3.71429		4	5	23		2	18	1							37	15	30	31	26	42	61	49	43	63	23	30
Female	1280	3	36		12	2	2	14	0	0	5	2	2	5	4	4	3	3.57143		5	5	13		1	18	1							39	25	38	32	25	42	61	50	44	62	25	30	1
Female	1281	3					2					2	3	3	3	2	3	2.28571			4	8		1	18	1							23	13	31	27	20	31	35	40	25	46	19	25
Female	1282	3			6	1	2	7	0	0	4	2	3	3	3	4	3	3.14286		4	4	13		2	18	1							27	7	28	27	18	34	44	38	33	50	15	21
Male	1283	3	70		70	3	2	73	1	1	5	3	3	2	2	4	5	3.42857		5	5	13		1	22	4							32	14	12	39	27	41	54	52	39				4
Female	1284	3	50		6	1	5	7	1	0	5	1	1	4	5	5	5	3.71429		5	5	13		1	21	3																63	27	29
	1285	3
Female	1286	3	50		6		2	6	0	0	4	2	1	1	1	3	3	2.14286		5	5	13		3	20	3							32	16	21	18	11	38	57	47	35				1
	1287	3
Male	1288	3	35		1.5	0	5	1.5	0	0	4	1	2	2	3	2	2	2.28571		2	2	2.5		2	22	4							27	18	22	29	28	39	43	38	33	52	21	19	2
Female	1289	3	55		8		0	8	0	0	2	2	2	2	3	4	3	2.57143		5	5	23		2	21	4							9	5	14	6	14	34	17	22	7	53	15	26	2
Female	1290	3	40		7	0.5	0	7.5	1	0	4	4	4	5	5	3	5	4.28571		5	5	26		1	21	4							17	6	13	9	21	38	22	26	11	64	28	30	4
Male	1291	3	50		9	0	2	9	0	0	5	2	2	5	5	4	2	3.57143		4	5	18		1	20	3							14	7	23	27	17	38	22	43	29	51	22	28
Female	1292	3	45		6	2	2	8	0	0	5	3	4	4	5	3	4	4		5	5	18		3	19	1							42	26	39	37	20	42	61	54	41	55	23	29
Female	1293	3	50		6	1	5	7	0	0	4	3	2	3	4	4	3	3.28571		3	4	8		1	22	4							42	28	25	27	19	28	51	54	27	50	27	23
Male	1294	3	360		10	0.5	2	10.5	0	0	5	3	4	5	4	5	2	4		4	3	8		2	21	4							16	5	15	12	17	34	11	16	13	58	20	25	3
Female	1295	3	60		10	3	5	13	1	0	4	3	4	5	5	2	1	3.42857		5	5	8		2	21	3							36	13	31	36	26	41	35	46	35	47	25	29	4
Male	1296	3	95		13	1	2	14	0	0	3	3	4	4	4	3	4	3.57143		5	4	13		1	21	4							17	5	9	10	12	28	36	30	24	57	19	25	2
Male	1297	3	87		9	0	2	9	0	0	2	1	4	5	5	5	2	3.42857		5	5	23		1	19	1							27	10	24	19	21	37	45	43	39	58	27	17
Female	1298	3	60		7	0	2	7	1	0	5	2	1	3	3	2	2	2.57143		5	5	8		5	22	4							35	14	27	25	24	40	51	54	42	51	23	27	3
Female	1299	3	67.5		7	1	0	8	1	0	3	1	1	4	4	3	4	2.85714		5	5	26		1	24 or older	2							30	7	20	6	9	32	51	39	22	37	18	27	3
Female	1300	3	75		13	4	2	17	0	0	4	3	4	4	4	2	3	3.42857		5	5	13		1	18	1							27	22	31	34	27	41	50	54	41	57	25	26
Female	1301	3	55		7	2	5	9	0	0	3	1	1	3	3	2	1	2		5	4	8		1	21	4							27	13	42	42	18	41	54	53	46	49	26	27	4
Male	1302	3	85		10	0	2	10	0	0	4	4	5	5	4	4	4	4.28571		4	2	2.5		1	21	3																62	28	29	3
Female	1303	4	45		7	1	0	8	0	0	4	1	4	2	3	2	4	2.85714		5	5	23		3	21	4							33	8	31	14	13	34	17	29	10	58	24	30
Male	1304	4	80		14	0	2	14	1	0	4	3	3	4	5	4	4	3.85714		5	5	18		2	21	3							24	5	27	18	19	32	59	46	31	52	14	28	3
	1305	4
Female	1306	4	50		9	9	2	18	0	0	5	4	3	5	5	4	5	4.42857				13		1	18	1																61	24	27	2
Male	1307	4	85		9	11	2	20	1	1	5	5	5	5	5	4	4	4.71429		4	2	8		2	21	3							11	7	33	20	26	39	18	24	15	65	29	30	4
Female	1308	4	60		7	1	2	8	1	0	4	1	1	2	4	5	4	3		4	4	2.5		2	20	2																63	28	30
Male	1309	4			8	3	2	11	0		2	1	2	4	4	3	3	2.71429		4	4	13		4	23	4							29	13	32	28	21	37	42	43	34	48	17	25
Female	1310	4	45		8	0	0	8	0	0	4	4	3	3	5	2	3	3.42857		4	4	13		1	18	1							26	6	33	36	25	41	21	50	26	60	28	30
Female	1311	4	50		11	0	5	11	0	0	4	1	4	4	5	5	1	3.42857		5	5	18		3	21	3							26	25	16	21	28	42	63	56	49	65	30	30	2
Female	1312	4	45		6	0	0	6	0	0	5	1	1	1	2	2	3	2.14286		5	5	23		1	19	1							33	10	30	10	19	38	35	34	23	51	11	28
Male	1313	9	60				0		1	0	3	3	3	2	3	2	3	2.71429		4	2	13		2	22	4							12	7	21	22	17	29	29	32	22	48	20	23
Female	1314	4	52		36	0	5	36	0	0	5	1	1	4	5	4	4	3.42857		5	5	23		1	21	4							27	12	39	24	16	40	25	45	41	65	22	28	2
	1315	4
Female	1316	4	55		6		0	6	0	0	5	3	4	5	5	5	4	4.42857		4	4	8		2	19	1							25	18	21	32	23	37	34	44	30	64	26	30
Female	1317	4	39		10	2	2	12	0	0	3	2	3	3	2	2	2	2.42857		4	4	8		1	19	1							26	13	29	22	17	31	34	32	20	51	16	28
Female	1318	4	50		10	0	0	10	0	0	2	1	1	2	2	2	2	1.71429		4	5	23		1	20	2							30	6	29	20	15	34	43	43	30	44	12	30
Male	1319	4	70		9		0	9	1	0	4	3	2	3	3	4	4	3.28571		4	4	23		1	21	3							33	12	21	22	24	38	32	32	24	55	23	26	4
Male	1320	4	70		7	0	2	7	0	0	5	2	3	4	4	5	5	4		5	5	18		5	23	5							29	14	15	8	8	29	36	35	39	37	6	29	1
Female	1321	4	50		7	1	2	8	1	0	2	1	1	3	4	3	4	2.57143		5	5	8		1	20	2							32	21	35	33	21	31	41	42	30	60	28	28
	1322	4
Female	1323	4	75		11	1	2	12	0	0	5	1	1	5	4	2	2	2.85714		5	5	8		1	20	3							31	8	26	15	18	42	47	44	34	40	11	22	1
Female	1324	4	80		10	0	5	10	1	0	5	2	3	4	5	3	4	3.71429		5	5	23		1	23	5							17	6	28	18	10	30	16	40	23	57	16	27	4
Female	1325	4	70		11	2	0	13	0	0	4	4	5	5	5	4	5	4.57143		5	4	18		1	20	2																59	23	27
	1326	4
	1327	4
Male	1328	4	50		7	0	2	7	1	0	2	1	1	3	2	3	5	2.42857		5	3	13		2	19	2							36	12	19	14	25	39	22	32	23	55	24	25
	1329	4
	1330	4
Male	1331	4	45		28	2	0	30	0	0	4	2	1	4	4	2	4	3		5	4	13		1	19	1							28	10	29	32	26	39	24	48	27	64	24	28
	1332	4
Male	1333	4	90		11	1	2	12	1	0	5	5	5	5	5	5	4	4.85714		5	4	23		2	21	3							12	5	14	16	22	37	20	21	13	57	19	26	4
Female	1334	4	50		3	4	5	7	0	0	5	3	4	4	5	4	4	4.14286		3	3	2.5		2	20	2							13	14	29	21	21	38	42	40	36	48	17	29	3
Male	1335	4	75		9	0	0	9	1	0	5	4	5	5	5	3	4	4.42857		4	3	2.5		2	21	4							33	9	13	10	25	41	25	23	8	64	28	26
Female	1336	4			8	7	0	15	1	0	4	3	3	4	5	4	4	3.85714		4	4	13		1	18	1							26	13	19	21	23	37	52	48	39	49	19	25	1
Male	1337	4	50		6	4	2	10	0	0	4	3	4	4	4	3	4	3.71429		5	5	26		1	19	1							42	9	34	27	22	38	52	39	32	57	16	27	1
	1338	4
Male	1339	4	65		11	0	2	11	0	0	5	1	1	1	4	5	4	3		5	1	23		4	21	3							37	12	26	25	25	41	27	44	26	60	21	29	2
Male	1340	4	90		12	1	2	13	1	1	5	5	5	5	5	5	5	5		5	4	13		1	22	4																61	25	28	4
Female	1341	4	45		7	0	0	7	0	0	3	2	2	4	4	3	2	2.85714		5	5	23		1	19	1							21	9	21	30	23	38	32	40	30
Female	1342	4	45		7	1	0	8	0	0	5	1	1	1	5	4	4	3		5	5	23		1	18	1							38	23	28	35	21	41	34	52	28	50	11	26
Male	1343	5	90		11		2	11	1	1	2	2	2	2	2	2	3	2.14286		5	5	2.5		2	23	5							20	16	31	39	22	34	30	50	32	53	27	30	4
Male	1344	5	70		6	1	0	7	0	0	3	2	5	3	4	4	3	3.42857		5	4	23		1	20	2							20	5	21	24	21	35	24	31	16	65	29	30
Female	1345	5	50		7		2	7	0	0	3	2	2	2	3	4	2	2.57143		5	5	8		1	20	2							36	13	34	30	21	34	31	35	33	53	21	23
Female	1346	5	65		9	2	2	11	0	0	4	1	1	1	1	4	2	2		5	5	8		3	21	3							38	15	38	18	8	33	48	44	44	39	22	26	3
Male	1347	5	80		8	2	2	10	1	0	4	2	2	5	5	4	3	3.57143		4	5	13		1	21	3							33	5	14	9	14	30	31	18	16	43	15	23
Female	1348	5	40		6	1	2	7	0	0	4	1	1	1	3	4	3	2.42857		5	5	18		1	19	1							25	22	29	29	18	37	51	48	47	45	11	27	2
Female	1349	5	52		6	1	5	7	0	0	5	3	3	2	5	2	5	3.57143		4	2	8		1	20	3																53	18	29
	1350	5	45			2	2	2
Female	1351	5	57.5		6.5	2.5	5	9	0	0	2	2	2	2	2	1	1	1.71429		5	5	8		2	20	3																			4
	1352	5	55		8	2		10
Male	1353	5	55		7	1	2	8	0	0	4	3	4	3	3	4	4	3.57143		2	3	8		3	21	3							16	7	31	16	21	34	18	25	13	52	19	24
Male	1354	5	90		12	0	2	12	0	0	2	2	2	4	4	3	4	3		5	4	13		2	20	2							22	12	36	16	13	30	31	32	20				1
	1355	6	75		7	3	5	10
Female	1356	7	45		6	0	0	6	0	0	1	1	1	1	4	2	2	1.71429		5	5	18		1	19	2							28	10	34	21	20	35	44	43	31				2
Male	1357	6	45		27	1	5	28	0	0	5	2	3	5	5	2	4	3.71429		5	4	8		1	20	2							37	24	35	37	16	41	59	41	40	59	20	30
Male	1358	6	80		12	0	2	12	0	0	3	1	3	5	4	2	2	2.85714		4	5	13		1	20	3							40	26	25	34	16	34	55	37	33	52	21	24
Male	1359	6	20		8	3	0	11	0	0	5	3	4	4	3	3	4	3.71429		5	5	8		1	20	1							28	10	31	42	28	42	56	50	23	65	29	28
Female	1360	6			7	0	0	7	0	0	4	1	2	3	4	1	3	2.57143		5	5	13		1	19	1							6	4	20	6	8	36	29	28	13	55	13	25	1
Male	1361	6	70		6	0	2	6	0	0	4	1	3	3	4	3	3	3		3	2	2.5		5	22	4							34	6	26	25	24	41	15	28	7				2
Male	1362	6	45		50	5	2	55	0	0	4	1	1	1	4	4	5	2.85714		4	4	26		1	19	2							40	20	41	31	10	32	63	56	49				1
Female	1363	6	48		8	1	2	9	0	0	5	1	1	2	5	4	5	3.28571		5	5	18		1	23	6							27	14	36	25	20	42	52	54	46	60	17	30	3
Male	1364	6	60		9	0	10	9	1	0	3	2	2	4	3	2	2	2.57143		4	5	26		2	22	6							29	17	27	22	22	37	54	44	36	58	24	26
	1365	6
Male	1366	6	100		13	0	0	13	0	0	5	3	3	2	4	3	4	3.42857		4	4	13		2	22	6							17	8	13	10	24	42	12	29	10	64	24	30	4
	1367	6
Female	1368	6					2		0	0	4	1	1	1	1	3	2	1.85714		3	1	8		1	21	3							9	4	18	6	8	9	9	12	11	41	15	20
Male	1369	6	60		7	7	0	14	0	0	3	2	1	4	4	3	3	2.85714		5	5	26		1	19	1							28	7	23	32	23	35	37	39	33	52	27	24
Female	1370	6	50		28	1	2	29	1	1	3	1	1	2		3	2			5	5	26		1	21	4																55	18	30	4
Male	1371	6	65		7	2	5	9	0	0	5	1	4	5	5	5	5	4.28571		3	3	8		1	23	4							39	18	36	15	20	41	43	43	33	53	15	30	2
Female	1372	6	40		6	2	2	8	0	0	2	1	1	2	2	2	2	1.71429		5	5	18		1	20	2							33	14	38	24	12	34	33	47	29	39	12	18
Female	1373	6	47		6	1	2	7	0	0	4	2	2	2	4	2	3	2.71429		5	5	26		2	21	3							24	11	18	18	17	32	29	28	19	50	19	24
Female	1374	6			6	3	2	9	0	0	1	1	1	1	1	1	1	1		5	5	18		1	20	2							10	4	15	6	9	18	11	13	8	58	18	24	2
Female	1375	6	55		7	6	2	13	0	0	2	1	1	1	2	2	1	1.42857		5	2	23		1	20	3																55	21	29	2
	1376	7	90		26	3	0	29
Female	1377	6	40		7	1	0	8	0	0	5	1	1	1	4	4	3	2.71429		5	5	13		1	19	1																51	16	29
Male	1378	6	65		10	3	2	13	0	0	4	2	2	4	5	3	3	3.28571		5	4	13		1	19	1							34	18	32	30	23	37	29	45	14	60	24	28	2
Male	1379	6	70		7	0	5	7	0	0	3	2	3	4	5	4	3	3.42857		4	4	13		2	22	4							31	18	31	34	22	35	48	45	34	54	24	25
Male	1380	6	70		8	2	0	10	0	0	5	4	4	4	4	5	5	4.42857		5	5	8		1	19	1
Male	1381	7	90		10	0	0	10	0	0	5	4	5	5	5	5	5	4.85714		5	5	8		1	21	4							26	10	26	37	22	42	9	42	37	65	25	29	2
Male	1382	7	80		7	0	2	7	0	0	4	3	3	5	5	2	3	3.57143		3	3	8		2	22	4							31	16	30	33	23	37	35	36	31	53	17	25	3
Female	1383	7	60		10	4	2	14	0	0	5	1	1	1	4	2	5	2.71429		4	5	26		1	22	4																48	23	19	2
Female	1384	7	50		5	0	10	5	1	1	5	5	5	5	5	5	1	4.42857		1	1	2.5		5	24 or older	5							11	17	36	35	9	19	48	28	25				4
Male	1385	7	65		6.5	2	2	8.5	0	0	2	1	1	4	3	2	2	2.14286		5	5	18		2	21	4							24	8	33	28	23	35	37	48	34	57	23	29	1
	1386	7	80		11	2		13
Female	1387	7	25			0.5	0	0.5	0	0	4	1	3	4	4	3	3	3.14286		5	5	8		2	18	1							36	20	37	35	24	40	46	49	38	55	22	27
Male	1388	7	80		10	2	5	12	0	0	4	2	2	4	4	2	4	3.14286		5	5	13		2	20	3							17	8	26	23	22	37	25	35	13	52	23	30	1
Female	1389	7	35		6	0	2	6	0	0	3	1	1	1	1	3	2	1.71429		5	5	23		1	21	4							23	11	34	16	9	33	43	37	25	42	14	21
Female	1390	7	45		7		2	7	0	0	3	1	1	1	3	4	4	2.42857		4	5	23		2	20	3							19	11	31	14	12	36	33	29	30	41	9	26
Male	1391	7	80		9	0	0	9	0	0	3	2	2	5	5	2	3	3.14286		5	5	13		1	20	2							27	9	24	32	22	41	33	46	32	59	22	30
Male	1392	7	80		10	0	5	10	0	0	3	1	1	1	4	4	3	2.42857		5	5	18		2	20	3							32	11	30	22	11	40	52	41	41	44	10	24	3
Female	1393	7	36		6	6	5	12	0	0	2	1	1	1	1	3	3	1.71429		5	5	13		1	21	4							25	18	32	30	26	39	46	47	32	59	18	26
Male	1394	8	60			1.5	2	1.5	0	0	3	3	4	4	4	4	1	3.28571		4	4	8		2	19	1																48	24	29	1
Female	1395	7	50		7	1	5	8	0	0	5	2	2	5	5	2	3	3.42857		4	3	2.5		1	21	4							32	14	35	35	26	42	40	53	36	63	23	30
Male	1396	7	100		9	0	0	9	0	0	3	2	4	5	3	2	3	3.14286		3	2	8		2	22	4							21	11	25	34	24	39	18	42	23	59	29	26	4
Male	1397	7	80		9	0	2	9	0	0	5	4	4	5	5	3	4	4.28571		5	5	13		1	20	2																			4
Male	1398	7	80		9	0	2	9	0	0	4	2	2	4	4	2	3	3		5	5	8		1	20	3							14	6	13	16	21	31	9	23	18	60	25	28	4
	1399	7
Male	1400	7	75		9	0	2	9	0	0	4	1	1	4	2	2	2	2.28571		4	5	8		1	21	4							38	17	22	14	25	42	30	36	19	62	24	30	2
	1401	7
Male	1402	7	50		50	6	2	56	0	0	4	2	2	5	3	4	3	3.28571		4	4	18		3	20	3							22	10	37	30	28	42	51	55	32	62	20	30
	1403	7
Male	1404	7	90		12	1	8	13	1	0	4	3	2	5	5	1	3	3.28571		3	2	8		1	21	2							37	14	30	30	22	39	43	43	31	52	18	26	2
Female	1405	7	72.5		8	1.5	0	9.5	1	1	5	5	5	4	5	1	3	4		4	3	2.5		2	20	3																62	20	29	4
Female	1406	7	65		10	3	0	13	0	0	4	1	1	2	2	3	1	2		5	5	26		1	23	6							38	14	38	27	21	41	35	49	36	59	20	26
	1407	7
Female	1408	8	50		6	1	2	7	0	0	3	1	1	1	1	1	2	1.42857		5	5	8		1	22	4							24	9	32	26	25	33	24	37	12	58	21	27	3
Female	1409	8	30		7	2	0	9	0	0	5	3	4	5	5	5	5	4.57143		5	5	8		2	21	3							34	28	13	32	28	42	52	56	48	65	30	30
Male	1410	8	80		6	3	2	9	1	0	4	4	5	5	5	3	4	4.28571		5	4	8		1	19	1																55	16	24	2
Male	1411	8	50		7	1	0	8	0	0	3	1	1	1	4	4	3	2.42857		4	3	18		1	19	1							29	16	26	27	24	37	47	42	28	51	21	23
	1412	8
Male	1413	8	52		7	3	2	10	0	0	5	1	1	3	5	5	4	3.42857		4	4	8		1	20	2							18	15	25	24	25	38	31	34	16	60	26	30	1
	1414	8
Male	1415	8	100		12	0	2	12	1	1	4	4	4	4	4	3	3	3.71429		4	3	8		3	21	4							21	15	29	17	15	23	18	26	15	51	21	24	4
	1416	8	40
Male	1417	8	45			2.5	2	2.5	0	0	3	4	4	5	5	3	2	3.71429		4	5	18		1	22	6							36	19	24	23	16	35	34	41	28	40	17	22
Male	1418	8	70			0	0		0	0	4	2	3	4	4	2	4	3.28571		2	2	2.5		1	19	1							12	8	10	26	26	36	31	37	24	62	24	28	3
Female	1419	8	45		7	1	5	8	1	0	2	1	1	3	4	5	2	2.57143		5	5	13		1	20	3							24	12	23	26	22	36	47	42	28	44	19	26	1
	1420	8
Male	1421	9	40		6	4	2	10	0	0	4	1	1	1	2	2	3	2		4		18		2	18	1																49	22	24	1
Female	1422	9	40		6	1	2	7	0	0	2	1	1	1	1	4	1	1.57143		5	5	18		1	21	4																49	25	24	1
Male	1423	9	60		7	0	0	7	0	0	4	1	2	2	3	2	4	2.57143		4	4	13		1	19	1							23	23	30	23	18	37	34	36	24	47	17	24	3
Male	1424	9	80		9	0	0	9	0	0	2	1	1	1	1	5	2	1.85714		4	4	23		1	22	4							17	23	8	21	16	21	18	16	11	39	26	23	4
Female	1425	9	40		7	2	2	9	0	0	4	1	1	2	3	5	4	2.85714		4	4	13		3	22	6							30	16	24	12	8	34	51	45	30	52	16	30
	1426	9
	1427	9
Female	1428	9	45		7	2	0	9	0	0	4	1	1	2	3	2	4	2.42857		5	5	23		1	20	2							30	16	34	29	27	41	38	43	30	65	21	30	1
Female	1429	9	52		8	3		11	1	0	5	4	3	4	4	4	4	4		4	5	18		4	21	4																64	23	29	4
Male	1430	9	88		7	0	2	7	1	0	5	4	5	5	5	5	5	4.85714		4	5	2.5		2	21	3							42	12	26	19	25	41	61	56	44	54	16	26	3
Female	1431	9	43		6	0	0	6	0	0	3	3	3	4	4	4	4	3.57143		4	4	13		1	19	1							30	11	34	23	20	38	34	34	32	53	15	26
Male	1432	9	75		9	0	2	9	0	0	5	3	3	4	4	2	5	3.71429		5	5	26		1	22	4							17	4	17	20	20	34	15	35	7	63	19	28	2
Male	1433	9	70		9	0	2	9	0	1	5	4	2		4	4	2	3			1	2.5		3	24 or older	6							34	18	30	33	24	40	34	48	42	51	28	24	3
Male	1434	9	65		7	4		11	0	0	4	2	2	2	3	3	3	2.71429		4	4	13		3	20	2																46	14	23	1
Male	1435	10	40		6	1.5	2	7.5	0	0	4	3	5	5	4	3	5	4.14286		4	3	2.5		1	20	3							31	11	25	26	12	38	47	37	39	51	14	24
Female	1436	10	40		7	3	5	10	0	0	3	1	1	1	5	5	4	2.85714		5	5	23		1	20	2																49	15	29
Male	1437	10	55		6	3	2	9	1	0	5	4	5	5	5	5	5	4.85714		5	2	8		1	19	2							26	13	33	34	20	39	24	46	37	60	21	29	3
Female	1438	10	50			0	0		0	0	5	1	1	3	3	2	3	2.57143		5	4	13		2	20	2							29	15	20	21	16	28	44	30	35	50	13	26	2
	1439	10
Male	1440	11	107.5		7	7	2	14	1	0	4	3	3	5	3	2	4	3.42857		4	4	13		2	23	5							26	13	26	25	21	34	38	35	22	54	26	25	4
	1441	11
Male	1442	11	80		7	2	0	9	1	0	5	5	5	5	5	3	4	4.57143		4	4	13		1	19	1							32	15	36	33	21	38	45	46	37	60	23	26
	1443	13	9		2	2	8	4
Female	1444	12	40		8	0	2	8	0	0	5	5	4	5	5	2	5	4.42857		4	4	8		1	18	1							28	14	27	29	23	42	33	45	37	64	19	30
Male	1445	12	100		10	0	2	10	1	0	2	2	5	2	3	4	1	2.71429		5	5	18		1	21	3							15	4	22	26	25	38	14	23	7	58	23	30
Male	1446	14	75		12	1	0	13	0	0	5	3	3	3	4	4	3	3.57143		5	5	18		2	20	2							30	18	12	8	17	30	36	8	14	47	15	24	1
Female	1447	14	50		9	2	2	11	1	0	4	2	2	3	4	2	5	3.14286		4	5	18		1	21	Third year							23	8	28	18	24	36	33	32	25	57	18	27	2
Female	1448	14	50		8	1	2	9	0	0	4	2	4	3	5	4	3	3.57143		5	2	13		1	21	3							20	12	21	25	21	34	15	31	22	55	26	30	3
Male	1449	14				2	0	2	1	1	5	5	5	5	5	5	1	4.42857		1	1	26		1	20	2
Male	1450	14	50		7	0	2	7	0	0	2	1	1	1	2	2	2	1.57143		4	4	18		2	22	4							24	14	28	24	17	35	34	40	35	46	18	29	2
Male	1451	14	90		12	3	0	15	0	0	2	2	2	4	4	3	3	2.85714		4	4	13		3	21	3							20	7	19	22	22	31	51	45	38	61	23	28	2
Male	1452	15	50		6	1	0	7	0	0	5	2	2	5	4	5	3	3.71429		3	4	2.5		2	19	1							34	16	29	35	27	36	19	43	25	49	22	26	1
Male	1453	15	85		10	1	2	11	0	0	4	4	5	5	5	5	5	4.71429		5	5	13		2	20	3							37	18	28	35	26	42	57	56	39	62	24	30	1
Female	1454	16	50		6	1	2	7	0	0	4	2	2	4	4	2	4	3.14286		5	5	18		2	22	4							21	7	23	7	9	25	25	31	17	52	15	28
Female	1455	17	60		10	4	0	14	1	0	3	3	3	4	4	4	3	3.42857		4	4	26		1	22	4							28	15	28	17	24	42	32	29	12	61	24	27
Female	1456	17	12		2	3	2	5	0	1	4	2	3	3	3	3	5	3.28571		4	2	8		2	19	1							20	10	28	27	20	30	17	34	20	54	25	24
Male	1457	18	50		7	0	0	7	0	0	3	2	3	4	4	4	4	3.42857		4	5	13		1	18	1							23	7	37	17	20	37	45	36	29	54	16	24
	1458	19
